# Supplementary material for: LINC00629, a KLF10-responsive lncRNA, promotes the anticancer effects of apigenin by decreasing Mcl1 stability in oral squamous cell carcinoma
Source: publisher site journal article supplement (doi:10.18632/aging.204396), 2022-11-28
Supplement: Supplementary file [file aging-v14i22-204396-supplementary-material-SD2.pdf]

## SUPPLEMENTARY TABLE

**Supplementary Table 1. The primers used in the article.**

| <b>Gene</b>     | <b>Forward primers 5'&gt; 3'</b> | <b>Reverse primers 5'&gt; 3'</b> |
|-----------------|----------------------------------|----------------------------------|
| LINC00629       | AACCTGTTTATGCACCTCC              | AGTGTCCATATAACATGGCAG            |
| LINC00857       | TCCGTTAAGCACCAGAAGTC             | AGCAATATGGAAGGGAATGGAG           |
| LINC00630       | TGCAGTGAACATGGGAGTAC             | AATCTGGCAAAGAGGGACTG             |
| LINC01273       | AGTCTCTGTTGCGGTGTTT              | TGTTTTCCAGGTCCATAGGTG            |
| LINC00342       | TGCTGAGTAACTGTGATTCCC            | CTTGGCTTCTCCCTCTAGTTG            |
| SNHG8           | GTCTACTCTGTGCTCTTGTG             | ACTTCGCCCATTACCACTTG             |
| PTV1            | CAAGTATTTTCTGAGCCTGATGG          | ACAGCCTCCCTTAAAACCAC             |
| LINC00511       | CTCCACTTAGGCTTCACACTG            | GCAACCTAGACCAATCAAACC            |
| OCT4            | GTGGAGGAAGCTGACAACAA             | GCCGGTTACAGAACCACACT             |
| Nanog           | ACCTATGCCTGTGATTTGTGG            | AGTGGGTTGTTTGCCTTTGG             |
| CD133           | GTGGATGCAGAACTTGACAAC            | ACCCTTTTGATACCTGCTACG            |
| Actin           | ATCAAGATCATTGCTCCTCCTGAG         | CTGCTTGCTGATCCACATCTG            |
| KLF10           | AAAGTTCCCATCTGAAGGCC             | TCACAACCTTTCCAGCTACAG            |
| KLF14           | CACCAAAGCCTATTACAAGTCG           | CAGTCGCAGGAGAAAGGG               |
| NKX3-1          | TCCCTGGTCTCCGTGTATAAC            | TGCTTTTCATAGAGACACCCTG           |
| FOXO6           | ATCACCAAAGCCATCGAGAG             | TGCTGTGCGCTTTATCCTTG             |
| MEIS1           | CACACCCTTACCCTTCTGAAG            | TTGACTTACTGCTCGGTTGG             |
| FOXA1           | AGGGCTGGATGGTTGTATTG             | TGAGTTCATGTTGCTGACCG             |
| LBX             | CGCCAGCAAGACGTTTAAG              | GCCCAAAGATGGTCATACCG             |
| LINC00629 Exon1 | TGCCGGGACGGCGCAAGG               | CCTGTCCCCGGGGCCTCTC              |
| LINC00629 Exon2 | AAACCTGTTTATGCACCC               | CTGAAGGGCAATGCAT                 |
| LINC00629 Exon3 | CTGCCATGTTATGAGGAC               | GCAAACATTACATGTTC                |
