# Supplementary material for: LINC00629, a KLF10-responsive lncRNA, promotes the anticancer effects of apigenin by decreasing Mcl1 stability in oral squamous cell carcinoma
Source: Aging (Albany NY). 2022 Nov 28;14(22):9149–66. doi: 10.18632/aging.204396 (PMC9740369; doi:10.18632/aging.204396)
Supplement: Supplementary Table 2 [file aging-14-204396-s003.xlsx]

## Sheet: Sheet1
Supplementary Table 2. The altered lncRNAs identified by RNA sequencing.
#ID	Symbol	L01_FPKM	L02_FPKM	PValue	log2FC	regulated
MSTRG.58623.6	MSTRG.58623.6	9013.1	0	9.44e-29	-21.182	down
MSTRG.58645.3	MSTRG.58645.3	92.7829	0.000554	5.09e-22	-14.7601	down
MSTRG.79627.5	MSTRG.79627.5	15.1702	0	1.57e-15	-14.1487	down
MSTRG.128458.2	MSTRG.128458.2	44.0461	0	1.23e-13	-13.1377	down
MSTRG.210297.1	MSTRG.210297.1	13.8235	0	2.39e-13	-12.9825	down
MSTRG.128458.6	MSTRG.128458.6	34.3739	0	1.72e-12	-12.5221	down
ENST00000422847	LINC00857-001	2.52704	0	1.05e-11	-12.0988	down
MSTRG.168948.3	MSTRG.168948.3	1.56853	0	1.27e-11	-12.0525	down
MSTRG.120579.30	MSTRG.120579.30	5.2053	0	1.67e-11	-11.9891	down
MSTRG.208852.1	MSTRG.208852.1	13.795	0	1.98e-11	-11.9498	down
MSTRG.128458.1	MSTRG.128458.1	19.4898	0	3.99e-11	-11.7835	down
MSTRG.120579.15	MSTRG.120579.15	2.20571	0	2.04e-10	-11.3992	down
ENST00000517927	MIR3142HG-001	1.37932	0	2.91e-10	-11.3149	down
MSTRG.128458.9	MSTRG.128458.9	14.9497	0	3.47e-10	-11.273	down
ENST00000466734	DUBR-002	0.952715	0	9.46e-10	-11.0328	down
MSTRG.116604.7	MSTRG.116604.7	0.752508	0	2.31e-09	-10.8164	down
ENST00000463183	LINC00960-001	1.46263	0	5.46e-09	-10.6164	down
MSTRG.114258.1	MSTRG.114258.1	1.35005	0	6.58e-09	-10.5686	down
MSTRG.120579.7	MSTRG.120579.7	2.29337	0	1.01e-08	-10.4682	down
MSTRG.120579.6	MSTRG.120579.6	2.21496	0	2.22e-08	-10.2693	down
ENST00000360656	CH17-340M24.3-001	2.41763	0	3.17e-08	-10.1814	down
MSTRG.128458.3	MSTRG.128458.3	6.09071	0	3.44e-08	-10.1631	down
ENST00000627065	GLIDR-003	0.835947	0	7.56e-08	-9.96673	down
ENST00000480284	MNX1-AS1-001	1.1848	0	7.93e-08	-9.95617	down
ENST00000622792	CTD-2024F21.1-001	1.09896	0	7.93e-08	-9.95617	down
MSTRG.25127.11	MSTRG.25127.11	0.448939	0	1.36e-07	-9.82304	down
ENST00000440496	LINC00630-001	0.533777	0	1.36e-07	-9.82304	down
MSTRG.114924.10	MSTRG.114924.10	0.462912	0	1.59e-07	-9.78775	down
ENST00000438107	RP11-706O15.3-002	0.489987	0	1.97e-07	-9.73931	down
ENST00000592135	LINC00910-001	0.418864	0	2.32e-07	-9.68918	down
MSTRG.20283.1	MSTRG.20283.1	0.374295	0	2.6e-07	-9.66345	down
ENST00000398043	APTR-003	1.87891	0	2.75e-07	-9.65041	down
ENST00000419813	KLHL7-AS1-001	0.384012	0	2.92e-07	-9.63725	down
MSTRG.128458.5	MSTRG.128458.5	4.72357	0	3.09e-07	-9.62397	down
ENST00000456917	MIR155HG-001	0.613367	0	3.09e-07	-9.62397	down
ENST00000588275	CTC-548K16.1-001	1.26028	0	3.28e-07	-9.61057	down
ENST00000377722	AC021218.2-001	0.370424	0	3.69e-07	-9.56959	down
MSTRG.170752.1	MSTRG.170752.1	0.433249	0	5.36e-07	-9.48398	down
MSTRG.44575.1	MSTRG.44575.1	0.462944	0	6.1e-07	-9.45427	down
MSTRG.23935.1	MSTRG.23935.1	0.471851	0	7.44e-07	-9.39296	down
MSTRG.35929.4	MSTRG.35929.4	0.100733	0	7.96e-07	-9.37722	down
MSTRG.39067.2	MSTRG.39067.2	0.434787	0	7.96e-07	-9.37722	down
ENST00000611026	RP11-717F1.2-201	0.361701	0	9.8e-07	-9.32893	down
ENST00000562842	CTD-2270L9.4-002	1.81566	0	9.8e-07	-9.32893	down
ENST00000585356	LINC00665-002	0.512831	0	9.8e-07	-9.32893	down
MSTRG.169479.2	MSTRG.169479.2	0.420927	0	1.13e-06	-9.29582	down
MSTRG.62344.2	MSTRG.62344.2	0.719785	0	1.13e-06	-9.29582	down
MSTRG.156136.1	MSTRG.156136.1	0.179164	0	1.21e-06	-9.27897	down
MSTRG.73150.1	MSTRG.73150.1	0.397818	0	1.21e-06	-9.27897	down
MSTRG.79165.1	MSTRG.79165.1	2.99817	0	1.31e-06	-9.24467	down
ENST00000604849	KANTR-002	0.631113	0	1.31e-06	-9.24467	down
MSTRG.211570.2	MSTRG.211570.2	0.34217	0	1.41e-06	-9.22722	down
ENST00000438002	RP11-108M9.3-001	0.294962	0	1.41e-06	-9.22722	down
ENST00000411453	LINC01273-001	1.07029	0	1.52e-06	-9.20954	down
MSTRG.96778.21	MSTRG.96778.21	0.605968	0	2.24e-06	-9.11778	down
ENST00000565747	CTD-2270L9.4-003	1.17745	0	2.43e-06	-9.09871	down
ENST00000436764	SNHG17-001	6.89809	0.006922	2.11e-11	-9.0944	down
ENST00000449713	AP001065.15-001	0.732255	0	2.63e-06	-9.07938	down
MSTRG.120579.27	MSTRG.120579.27	0.585886	0	3.11e-06	-9.01978	down
ENST00000594472	SOS1-IT1-002	0.541121	0	3.11e-06	-9.01978	down
ENST00000398957	RP11-717D12.1-001	0.444739	0	3.39e-06	-8.99936	down
ENST00000449434	LINC00665-004	0.968284	0	3.39e-06	-8.99936	down
ENST00000448494	LINC00342-002	0.268908	0	3.39e-06	-8.99936	down
MSTRG.15094.6	MSTRG.15094.6	0.652008	0	3.7e-06	-8.97864	down
MSTRG.184916.2	MSTRG.184916.2	0.163302	0	3.7e-06	-8.97864	down
ENST00000453426	PSMB8-AS1-001	0.494104	0	3.7e-06	-8.97864	down
ENST00000399868	RP11-563J2.2-001	0.194922	0	4.41e-06	-8.93629	down
MSTRG.199969.2	MSTRG.199969.2	0.905958	0	4.82e-06	-8.91464	down
ENST00000558277	RP11-624L4.1-006	0.758576	0	4.82e-06	-8.91464	down
MSTRG.873.1	MSTRG.873.1	0.926951	0	6.37e-06	-8.84767	down
MSTRG.197167.1	MSTRG.197167.1	0.270098	0	6.37e-06	-8.82464	down
MSTRG.66832.1	MSTRG.66832.1	0.316481	0	7.73e-06	-8.77744	down
ENST00000429480	LINC00337-001	0.415231	0	7.73e-06	-8.77744	down
MSTRG.113831.1	MSTRG.113831.1	0.438565	0	8.53e-06	-8.75324	down
MSTRG.124089.2	MSTRG.124089.2	0.488069	0	8.53e-06	-8.75324	down
ENST00000563434	RP11-4O1.2-002	0.116833	0	9.43e-06	-8.72864	down
MSTRG.186658.4	MSTRG.186658.4	0.467077	0	1.16e-05	-8.67814	down
MSTRG.156242.1	MSTRG.156242.1	0.659937	0	1.29e-05	-8.6522	down
MSTRG.22682.1	MSTRG.22682.1	0.30662	0	1.29e-05	-8.6522	down
MSTRG.139990.1	MSTRG.139990.1	0.5814	0	1.29e-05	-8.6522	down
MSTRG.58645.4	MSTRG.58645.4	157.559	0.399097	8.41e-14	-8.63483	down
MSTRG.176824.1	MSTRG.176824.1	0.391633	0	1.43e-05	-8.6258	down
ENST00000423663	LINC01320-001	0.442316	0	1.43e-05	-8.6258	down
MSTRG.71901.1	MSTRG.71901.1	0.146259	0	1.6e-05	-8.5989	down
ENST00000442673	LINC01134-003	0.156543	0	1.6e-05	-8.5989	down
ENST00000619488	CH507-24F1.2-201	0.216626	0	1.6e-05	-8.5989	down
MSTRG.88904.1	MSTRG.88904.1	0.358862	0	1.79e-05	-8.57149	down
MSTRG.28204.1	MSTRG.28204.1	0.230279	0	1.79e-05	-8.57149	down
MSTRG.166997.1	MSTRG.166997.1	0.227278	0	1.79e-05	-8.57149	down
ENST00000607967	RP11-47A8.5-001	0.347255	0	1.79e-05	-8.57149	down
ENST00000601389	LINC01515-006	0.513136	0	1.79e-05	-8.57149	down
ENST00000431385	MIR4435-2HG-016	0.559739	0	1.79e-05	-8.57149	down
MSTRG.92816.3	MSTRG.92816.3	0.484375	0	1.79e-05	-8.54355	down
MSTRG.69311.1	MSTRG.69311.1	0.269637	0	2e-05	-8.51506	down
ENST00000454709	RP11-96C23.9-001	0.657192	0	2e-05	-8.51506	down
MSTRG.65327.1	MSTRG.65327.1	0.773568	0	2.24e-05	-8.48599	down
ENST00000546968	RP11-44N21.1-002	0.456838	0	2.24e-05	-8.48599	down
MSTRG.127598.1	MSTRG.127598.1	0.307826	0	2.52e-05	-8.45633	down
MSTRG.81178.1	MSTRG.81178.1	0.508451	0	2.52e-05	-8.45633	down
MSTRG.12742.3	MSTRG.12742.3	0.308414	0	2.52e-05	-8.45633	down
MSTRG.90205.1	MSTRG.90205.1	0.265901	0	2.52e-05	-8.45633	down
MSTRG.97913.1	MSTRG.97913.1	1.81204	0	2.52e-05	-8.45633	down
ENST00000450238	LINC01011-003	0.488031	0	2.52e-05	-8.45633	down
ENST00000609473	RP13-131K19.7-001	0.896702	0	2.52e-05	-8.45633	down
ENST00000457033	AC073130.1-001	0.219929	0	2.52e-05	-8.45633	down
MSTRG.18887.1	MSTRG.18887.1	0.856307	0	2.84e-05	-8.42604	down
ENST00000437322	USP27X-AS1-001	0.195302	0	2.84e-05	-8.42604	down
ENST00000314957	CTD-2201E18.3-001	0.173339	0	3.21e-05	-8.39511	down
MSTRG.36360.1	MSTRG.36360.1	0.449849	0	3.63e-05	-8.36349	down
MSTRG.195804.1	MSTRG.195804.1	0.252198	0	3.63e-05	-8.36349	down
ENST00000617013	RP11-622C24.2-001	0.060732	0	3.63e-05	-8.36349	down
MSTRG.62303.1	MSTRG.62303.1	0.292468	0	4.12e-05	-8.33117	down
MSTRG.58230.1	MSTRG.58230.1	0.462022	0	4.12e-05	-8.33117	down
MSTRG.40846.1	MSTRG.40846.1	0.470658	0	4.12e-05	-8.33117	down
ENST00000478845	CTD-2033D15.2-001	0.539902	0	4.12e-05	-8.33117	down
MSTRG.125872.1	MSTRG.125872.1	0.31827	0	4.69e-05	-8.29811	down
MSTRG.184932.2	MSTRG.184932.2	0.488309	0	4.69e-05	-8.29811	down
MSTRG.34227.2	MSTRG.34227.2	0.616752	0	4.69e-05	-8.29811	down
MSTRG.209232.2	MSTRG.209232.2	0.389717	0	4.69e-05	-8.29811	down
ENST00000606522	RP11-421M1.8-001	0.354774	0	4.69e-05	-8.29811	down
ENST00000542112	SNHG1-007	0.490871	0	4.69e-05	-8.29811	down
MSTRG.88996.1	MSTRG.88996.1	0.477851	0	5.36e-05	-8.26427	down
ENST00000634994	RP11-242D8.1-004	0.189798	0	5.36e-05	-8.26427	down
ENST00000620190	LINC00869-003	0.299088	0	5.36e-05	-8.26427	down
ENST00000624818	RP4-695O20.1-001	0.183143	0	5.36e-05	-8.26427	down
ENST00000606064	RP11-722E23.2-001	0.655608	0	5.36e-05	-8.26427	down
MSTRG.105511.10	MSTRG.105511.10	0.279412	0	6.13e-05	-8.22962	down
MSTRG.87839.1	MSTRG.87839.1	0.210615	0	6.13e-05	-8.19412	down
MSTRG.104090.1	MSTRG.104090.1	0.230747	0	6.13e-05	-8.19412	down
MSTRG.69170.1	MSTRG.69170.1	0.58582	0	6.13e-05	-8.19412	down
ENST00000602979	RP11-419I17.2-001	0.538721	0	6.13e-05	-8.19412	down
ENST00000593078	RP11-712P20.2-001	0.213766	0	6.13e-05	-8.19412	down
MSTRG.25393.1	MSTRG.25393.1	0.233057	0	7.04e-05	-8.15772	down
ENST00000514769	RP11-138J23.1-001	0.607233	0	7.04e-05	-8.15772	down
ENST00000579629	AC145343.2-001	0.544594	0	7.04e-05	-8.15772	down
ENST00000563059	KB-1836B5.1-001	0.380234	0	7.04e-05	-8.15772	down
MSTRG.125555.1	MSTRG.125555.1	0.561427	0	8.11e-05	-8.12038	down
ENST00000412798	ZNRF3-IT1-001	0.506616	0	8.11e-05	-8.12038	down
ENST00000434264	RP11-206L10.9-017	0.40623	0	8.11e-05	-8.12038	down
MSTRG.28378.1	MSTRG.28378.1	0.477057	0	9.36e-05	-8.08204	down
MSTRG.103407.1	MSTRG.103407.1	0.488349	0	9.36e-05	-8.08204	down
MSTRG.95612.5	MSTRG.95612.5	0.270675	0	9.36e-05	-8.08204	down
ENST00000366109	RP11-498P14.5-001	0.576023	0	9.36e-05	-8.08204	down
ENST00000415215	JPX-003	0.703641	0	9.36e-05	-8.08204	down
ENST00000562082	RP11-119F7.5-001	0.146099	0	9.36e-05	-8.08204	down
MSTRG.200244.1	MSTRG.200244.1	0.422222	0	0.000108555	-8.04266	down
MSTRG.55397.1	MSTRG.55397.1	0.328956	0	0.000108555	-8.04266	down
ENST00000413768	DUXAP8-001	0.155507	0	0.000108555	-8.04266	down
MSTRG.37600.1	MSTRG.37600.1	0.396122	0	0.000126293	-8.00218	down
MSTRG.213502.2	MSTRG.213502.2	1.09097	0	0.000126293	-8.00218	down
MSTRG.81889.1	MSTRG.81889.1	0.335913	0	0.000126293	-8.00218	down
MSTRG.9001.1	MSTRG.9001.1	0.646939	0	0.000126293	-8.00218	down
MSTRG.124480.7	MSTRG.124480.7	0.357782	0	0.000126293	-8.00218	down
MSTRG.110036.4	MSTRG.110036.4	0.273607	0	0.000126293	-8.00218	down
MSTRG.36960.1	MSTRG.36960.1	0.8023	0	0.000147483	-7.96052	down
MSTRG.120113.1	MSTRG.120113.1	0.290767	0	0.000147483	-7.96052	down
ENST00000607611	RP11-52A20.2-001	0.161398	0	0.000147483	-7.96052	down
MSTRG.171179.1	MSTRG.171179.1	0.278153	0	0.000172911	-7.91763	down
MSTRG.84757.1	MSTRG.84757.1	0.286405	0	0.000172911	-7.91763	down
MSTRG.94494.1	MSTRG.94494.1	0.359403	0	0.000172911	-7.91763	down
MSTRG.122698.1	MSTRG.122698.1	0.211892	0	0.000172911	-7.91763	down
MSTRG.212588.1	MSTRG.212588.1	0.345669	0	0.000172911	-7.91763	down
MSTRG.186792.1	MSTRG.186792.1	0.31099	0	0.000203569	-7.87342	down
MSTRG.99616.1	MSTRG.99616.1	0.235008	0	0.000203569	-7.87342	down
MSTRG.132430.1	MSTRG.132430.1	0.452547	0	0.000203569	-7.87342	down
ENST00000415205	OGFRP1-002	0.599255	0	0.000203569	-7.87342	down
ENST00000359074	SNHG11-006	0.278933	0	0.000203569	-7.87342	down
ENST00000496975	AC084117.3-001	1.0498	0	0.000203569	-7.87342	down
MSTRG.124452.1	MSTRG.124452.1	0.157495	0	0.000240716	-7.82781	down
MSTRG.189657.1	MSTRG.189657.1	0.285786	0	0.000240716	-7.82781	down
MSTRG.35114.3	MSTRG.35114.3	0.241346	0	0.000240716	-7.82781	down
MSTRG.71796.1	MSTRG.71796.1	0.183089	0	0.000240716	-7.82781	down
MSTRG.198209.1	MSTRG.198209.1	0.283135	0	0.000240716	-7.82781	down
ENST00000576365	RP11-212I21.4-001	0.072609	0	0.000240716	-7.82781	down
ENST00000455395	FTX-004	0.42263	0	0.000240716	-7.82781	down
ENST00000581192	LINC00909-002	0.65423	0	0.000240716	-7.82781	down
MSTRG.20830.1	MSTRG.20830.1	0.272904	0	0.000285964	-7.78072	down
MSTRG.28255.1	MSTRG.28255.1	0.187294	0	0.000285964	-7.78072	down
MSTRG.174769.1	MSTRG.174769.1	0.239823	0	0.000285964	-7.78072	down
MSTRG.198586.2	MSTRG.198586.2	0.229996	0	0.000285964	-7.78072	down
MSTRG.144138.1	MSTRG.144138.1	0.292126	0	0.000285964	-7.78072	down
ENST00000613918	RP11-5G9.5-001	0.592956	0	0.000285964	-7.78072	down
ENST00000541615	SNHG1-020	0.36042	0	0.000285964	-7.78072	down
ENST00000449005	LINC01128-004	0.304824	0	0.000285964	-7.78072	down
MSTRG.184427.1	MSTRG.184427.1	0.378754	0	0.000285964	-7.73204	down
MSTRG.69317.1	MSTRG.69317.1	0.23617	0	0.000285964	-7.73204	down
MSTRG.11984.2	MSTRG.11984.2	0.615488	0	0.000285964	-7.73204	down
MSTRG.193699.1	MSTRG.193699.1	0.326203	0	0.000285964	-7.73204	down
ENST00000439156	RP11-776H12.1-001	0.143002	0	0.000285964	-7.73204	down
ENST00000592404	CTC-459F4.3-011	0.33575	0	0.000285964	-7.73204	down
ENST00000606966	AC006273.4-001	0.299782	0	0.000285964	-7.73204	down
ENST00000623347	CH507-145C22.4-001	0.291174	0	0.000285964	-7.73204	down
ENST00000557691	RP6-65G23.3-001	0.409412	0	0.000285964	-7.73204	down
MSTRG.95608.1	MSTRG.95608.1	0.714305	0	0.000341383	-7.68165	down
MSTRG.66825.1	MSTRG.66825.1	0.360193	0	0.000341383	-7.68165	down
MSTRG.14696.1	MSTRG.14696.1	0.205542	0	0.000341383	-7.68165	down
MSTRG.119973.3	MSTRG.119973.3	0.369909	0	0.000341383	-7.68165	down
MSTRG.97723.2	MSTRG.97723.2	0.320755	0	0.000341383	-7.68165	down
MSTRG.192126.1	MSTRG.192126.1	0.267204	0	0.000341383	-7.68165	down
ENST00000530083	AP006621.5-001	0.329616	0	0.000341383	-7.68165	down
ENST00000492465	RPARP-AS1-002	0.158269	0	0.000341383	-7.68165	down
ENST00000567102	RP11-395I6.3-001	0.219996	0	0.000341383	-7.68165	down
MSTRG.196252.1	MSTRG.196252.1	0.231261	0	0.00040966	-7.62945	down
MSTRG.169340.1	MSTRG.169340.1	0.212565	0	0.00040966	-7.62945	down
MSTRG.137674.1	MSTRG.137674.1	0.480747	0	0.00040966	-7.62945	down
MSTRG.105570.1	MSTRG.105570.1	0.501054	0	0.00040966	-7.62945	down
MSTRG.19930.2	MSTRG.19930.2	0.338631	0	0.00040966	-7.62945	down
ENST00000477984	LINC00336-001	0.116044	0	0.00040966	-7.62945	down
ENST00000602601	RP11-214K3.20-001	0.431721	0	0.00040966	-7.62945	down
ENST00000418041	RP5-887A10.1-002	0.437603	0	0.00040966	-7.62945	down
MSTRG.170745.23	MSTRG.170745.23	0.371613	0	0.0004943	-7.57528	down
MSTRG.83852.1	MSTRG.83852.1	0.844943	0	0.0004943	-7.57528	down
MSTRG.23901.1	MSTRG.23901.1	0.402388	0	0.0004943	-7.57528	down
MSTRG.124778.1	MSTRG.124778.1	0.201694	0	0.0004943	-7.57528	down
MSTRG.75640.1	MSTRG.75640.1	0.450147	0	0.0004943	-7.57528	down
MSTRG.11473.25	MSTRG.11473.25	0.279948	0	0.0004943	-7.57528	down
MSTRG.72906.1	MSTRG.72906.1	0.280118	0	0.0004943	-7.57528	down
MSTRG.90012.1	MSTRG.90012.1	0.378865	0	0.0004943	-7.57528	down
ENST00000480237	LINC00173-002	0.145392	0	0.0004943	-7.57528	down
MSTRG.120784.1	MSTRG.120784.1	0.560988	0	0.00059992	-7.519	down
MSTRG.126134.1	MSTRG.126134.1	0.298216	0	0.00059992	-7.519	down
MSTRG.182440.1	MSTRG.182440.1	0.269246	0	0.00059992	-7.519	down
MSTRG.184907.1	MSTRG.184907.1	0.242922	0	0.00059992	-7.519	down
MSTRG.171175.4	MSTRG.171175.4	0.156774	0	0.00059992	-7.519	down
MSTRG.131583.1	MSTRG.131583.1	0.512956	0	0.00059992	-7.519	down
ENST00000558757	RP11-815J21.1-001	0.295357	0	0.00059992	-7.519	down
MSTRG.25348.1	MSTRG.25348.1	0.395821	0	0.000732646	-7.46043	down
MSTRG.86243.1	MSTRG.86243.1	0.37404	0	0.000732646	-7.46043	down
MSTRG.143827.1	MSTRG.143827.1	0.21627	0	0.000732646	-7.46043	down
MSTRG.5040.2	MSTRG.5040.2	0.326945	0	0.000732646	-7.46043	down
MSTRG.113833.1	MSTRG.113833.1	0.185671	0	0.000732646	-7.46043	down
MSTRG.150815.1	MSTRG.150815.1	0.337996	0	0.000732646	-7.46043	down
MSTRG.25566.1	MSTRG.25566.1	0.391534	0	0.000732646	-7.46043	down
ENST00000561202	RP11-50C13.2-001	0.119642	0	0.000732646	-7.46043	down
ENST00000623190	CH507-338C24.1-003	0.142849	0	0.000732646	-7.46043	down
ENST00000609902	MIR4435-2HG-022	0.361157	0	0.000732646	-7.46043	down
ENST00000627197	EBLN3-006	0.375655	0	0.000732646	-7.46043	down
ENST00000613809	RP11-88E10.4-001	0.059129	0	0.000732646	-7.46043	down
ENST00000608952	RP4-539M6.21-001	0.644976	0	0.000732646	-7.46043	down
ENST00000455131	LINC00152-011	0.286924	0	0.000732646	-7.46043	down
ENST00000610421	RP11-36I17.2-001	0.37925	0	0.000732646	-7.46043	down
MSTRG.77046.1	MSTRG.77046.1	0.30008	0	0.000900684	-7.39939	down
MSTRG.182340.1	MSTRG.182340.1	0.323787	0	0.000900684	-7.39939	down
MSTRG.20580.1	MSTRG.20580.1	0.244374	0	0.000900684	-7.39939	down
MSTRG.207976.1	MSTRG.207976.1	0.333279	0	0.000900684	-7.39939	down
MSTRG.189991.12	MSTRG.189991.12	0.235201	0	0.000900684	-7.39939	down
MSTRG.176918.3	MSTRG.176918.3	0.268386	0	0.000900684	-7.39939	down
MSTRG.1503.1	MSTRG.1503.1	0.323749	0	0.000900684	-7.39939	down
ENST00000635799	AC093375.1-009	0.235918	0	0.000900684	-7.39939	down
ENST00000616947	RP4-669L17.10-015	0.342148	0	0.000900684	-7.39939	down
ENST00000436665	LINC01106-003	0.092549	0	0.000900684	-7.39939	down
ENST00000559841	CTD-2339L15.3-001	0.391141	0	0.000900684	-7.39939	down
ENST00000532541	LINC00958-006	0.183236	0	0.000900684	-7.39939	down
ENST00000433357	CYP4F26P-003	0.242664	0	0.000900684	-7.39939	down
ENST00000551421	RP11-620J15.3-002	0.455561	0	0.000900684	-7.39939	down
MSTRG.83047.1	MSTRG.83047.1	0.331417	0	0.00111513	-7.33564	down
MSTRG.38574.1	MSTRG.38574.1	0.295979	0	0.00111513	-7.33564	down
MSTRG.42739.2	MSTRG.42739.2	0.125215	0	0.00111513	-7.33564	down
MSTRG.189714.1	MSTRG.189714.1	0.372554	0	0.00111513	-7.33564	down
MSTRG.15693.1	MSTRG.15693.1	0.311779	0	0.00111513	-7.33564	down
MSTRG.63113.1	MSTRG.63113.1	0.196456	0	0.00111513	-7.33564	down
MSTRG.54347.1	MSTRG.54347.1	0.151662	0	0.00111513	-7.33564	down
MSTRG.9604.1	MSTRG.9604.1	0.210642	0	0.00111513	-7.33564	down
MSTRG.56725.1	MSTRG.56725.1	0.289143	0	0.00111513	-7.33564	down
MSTRG.61975.4	MSTRG.61975.4	0.128371	0	0.00111513	-7.33564	down
ENST00000609062	LINC00310-006	0.222651	0	0.00111513	-7.33564	down
ENST00000437461	RP11-121A14.3-001	0.536357	0	0.00111513	-7.33564	down
ENST00000591141	RP11-322E11.5-002	0.274759	0	0.00111513	-7.33564	down
ENST00000412918	ITPKB-IT1-003	0.258565	0	0.00111513	-7.33564	down
ENST00000635097	RP1-224A6.3-002	0.190332	0	0.00111513	-7.33564	down
ENST00000590092	CTC-559E9.1-007	0.192371	0	0.00111513	-7.33564	down
ENST00000428651	AC093375.1-002	0.123756	0	0.00111513	-7.33564	down
MSTRG.57516.1	MSTRG.57516.1	0.213781	0	0.00139116	-7.26896	down
MSTRG.125053.1	MSTRG.125053.1	0.743904	0	0.00139116	-7.26896	down
MSTRG.201870.1	MSTRG.201870.1	0.269229	0	0.00139116	-7.26896	down
MSTRG.137492.1	MSTRG.137492.1	0.18637	0	0.00139116	-7.26896	down
MSTRG.66750.1	MSTRG.66750.1	0.347331	0	0.00139116	-7.26896	down
MSTRG.61028.1	MSTRG.61028.1	0.367714	0	0.00139116	-7.26896	down
ENST00000425296	THRB-IT1-001	0.108792	0	0.00139116	-7.26896	down
ENST00000588223	CTC-559E9.1-005	0.335141	0	0.00139116	-7.26896	down
ENST00000487977	C1orf132-002	0.056909	0	0.00139116	-7.26896	down
ENST00000618303	RP5-965G21.4-001	0.078498	0	0.00139116	-7.26896	down
MSTRG.208040.2	MSTRG.208040.2	0.398208	0	0.0017497	-7.19903	down
MSTRG.21128.1	MSTRG.21128.1	0.393979	0	0.0017497	-7.19903	down
MSTRG.116.2	MSTRG.116.2	0.214904	0	0.0017497	-7.19903	down
MSTRG.85842.1	MSTRG.85842.1	0.215106	0	0.0017497	-7.19903	down
ENST00000606358	RP11-1277A3.3-001	0.332638	0	0.0017497	-7.19903	down
ENST00000483854	RP11-706O15.1-001	0.254701	0	0.0017497	-7.19903	down
ENST00000585826	RP11-206L10.9-006	0.450029	0	0.0017497	-7.19903	down
ENST00000606235	RP11-363E6.4-001	0.082574	0	0.0017497	-7.19903	down
ENST00000569920	LCMT1-AS1-002	0.371565	0	0.0017497	-7.19903	down
ENST00000606778	RP11-44N12.5-001	0.345389	0	0.0017497	-7.19903	down
ENST00000602618	RP11-415J8.7-001	0.375818	0	0.0017497	-7.19903	down
ENST00000631194	RP11-744A16.4-002	0.150832	0	0.0017497	-7.19903	down
ENST00000606573	FAM66B-002	0.069116	0	0.0017497	-7.19903	down
MSTRG.63206.1	MSTRG.63206.1	0.27015	0	0.00222005	-7.12555	down
MSTRG.87839.6	MSTRG.87839.6	0.218474	0	0.00222005	-7.12555	down
MSTRG.25134.1	MSTRG.25134.1	0.477736	0	0.00222005	-7.12555	down
MSTRG.97524.1	MSTRG.97524.1	0.264917	0	0.00222005	-7.12555	down
MSTRG.182487.1	MSTRG.182487.1	0.278828	0	0.00222005	-7.12555	down
MSTRG.17417.3	MSTRG.17417.3	0.456371	0	0.00222005	-7.12555	down
MSTRG.177464.1	MSTRG.177464.1	0.236932	0	0.00222005	-7.12555	down
MSTRG.134319.1	MSTRG.134319.1	0.296797	0	0.00222005	-7.12555	down
MSTRG.157645.3	MSTRG.157645.3	0.260726	0	0.00222005	-7.12555	down
ENST00000607786	RP11-307L14.1-001	0.320503	0	0.00222005	-7.12555	down
ENST00000427778	LINC00963-023	0.451954	0	0.00222005	-7.12555	down
ENST00000621354	RP11-771K4.3-001	0.406688	0	0.00222005	-7.12555	down
ENST00000617667	RP11-8P13.5-001	0.396246	0	0.00222005	-7.12555	down
ENST00000589244	RP11-332H18.3-002	0.244002	0	0.00222005	-7.12555	down
MSTRG.16557.1	MSTRG.16557.1	0.245155	0	0.00222005	-7.04812	down
MSTRG.113140.1	MSTRG.113140.1	0.277786	0	0.00222005	-7.04812	down
MSTRG.194923.1	MSTRG.194923.1	0.326809	0	0.00222005	-7.04812	down
MSTRG.213096.1	MSTRG.213096.1	0.29191	0	0.00222005	-7.04812	down
MSTRG.162516.1	MSTRG.162516.1	0.460422	0	0.00222005	-7.04812	down
MSTRG.10987.1	MSTRG.10987.1	0.530841	0	0.00222005	-7.04812	down
MSTRG.69199.1	MSTRG.69199.1	0.323879	0	0.00222005	-7.04812	down
MSTRG.166041.1	MSTRG.166041.1	0.178529	0	0.00222005	-7.04812	down
ENST00000564460	LA16c-306A4.2-001	0.033374	0	0.00222005	-7.04812	down
ENST00000452342	RP11-644K8.1-001	0.274411	0	0.00222005	-7.04812	down
ENST00000557322	CTD-2002H8.2-001	0.279866	0	0.00222005	-7.04812	down
ENST00000444871	RP11-89K21.1-003	0.270014	0	0.00222005	-7.04812	down
ENST00000635968	RP4-614C10.2-002	0.197481	0	0.00222005	-7.04812	down
ENST00000506836	CTC-236F12.4-002	0.246487	0	0.00222005	-7.04812	down
ENST00000626334	RP11-379B18.5-019	0.226042	0	0.00222005	-7.04812	down
ENST00000416099	RP11-552M11.4-002	0.217993	0	0.00222005	-7.04812	down
ENST00000604052	RP11-373D23.2-001	0.551428	0	0.00222005	-7.04812	down
ENST00000454068	GAS5-014	0.228924	0	0.00222005	-7.04812	down
ENST00000495287	LINC01391-001	0.043716	0	0.00222005	-7.04812	down
ENST00000529656	RSF1-IT2-001	0.280933	0	0.00222005	-7.04812	down
ENST00000498714	FOXP1-IT1-001	0.044056	0	0.00222005	-7.04812	down
MSTRG.151208.1	MSTRG.151208.1	0.910547	0.000286	1.12e-07	-7.0435	down
ENST00000421004	SCAMP1-AS1-001	2.97763	0.016322	3.33e-09	-7.00501	down
MSTRG.77078.3	MSTRG.77078.3	0.143444	0	0.00284366	-6.9663	down
MSTRG.18579.2	MSTRG.18579.2	0.106193	0	0.00284366	-6.9663	down
MSTRG.178225.1	MSTRG.178225.1	0.212106	0	0.00284366	-6.9663	down
MSTRG.114258.3	MSTRG.114258.3	0.360114	0	0.00284366	-6.9663	down
MSTRG.114258.4	MSTRG.114258.4	0.303445	0	0.00284366	-6.9663	down
MSTRG.21519.1	MSTRG.21519.1	0.265159	0	0.00284366	-6.9663	down
MSTRG.38762.1	MSTRG.38762.1	0.555725	0	0.00284366	-6.9663	down
MSTRG.20249.1	MSTRG.20249.1	0.220914	0	0.00284366	-6.9663	down
ENST00000616576	RP11-87C12.5-002	0.23063	0	0.00284366	-6.9663	down
ENST00000609352	RP11-379B18.5-009	0.162239	0	0.00284366	-6.9663	down
ENST00000581712	RP11-769O8.3-001	0.092743	0	0.00284366	-6.9663	down
ENST00000533920	MIR210HG-003	0.18264	0	0.00284366	-6.9663	down
ENST00000541578	SNHG1-021	0.248613	0	0.00284366	-6.9663	down
ENST00000554595	RP11-537P22.2-001	0.186065	0	0.00284366	-6.9663	down
ENST00000521021	CTC-756D1.2-001	0.240354	0	0.00284366	-6.9663	down
ENST00000460977	RP11-383G6.3-001	0.200954	0	0.00284366	-6.9663	down
ENST00000575173	RP11-156P1.3-009	0.142509	0	0.00284366	-6.9663	down
ENST00000432473	LINC01315-003	0.188971	0	0.00284366	-6.9663	down
ENST00000625484	RP11-379B18.5-020	0.181596	0	0.00284366	-6.9663	down
ENST00000452366	RP3-471M13.2-001	0.229964	0	0.00284366	-6.9663	down
ENST00000511893	AC007036.5-001	0.251082	0	0.00284366	-6.9663	down
ENST00000435966	LINC00630-003	0.270872	0	0.00284366	-6.9663	down
MSTRG.20888.20	MSTRG.20888.20	0.152258	0	0.00368003	-6.87956	down
MSTRG.89725.1	MSTRG.89725.1	0.19106	0	0.00368003	-6.87956	down
MSTRG.49738.1	MSTRG.49738.1	0.313423	0	0.00368003	-6.87956	down
MSTRG.21121.1	MSTRG.21121.1	0.244046	0	0.00368003	-6.87956	down
MSTRG.62571.1	MSTRG.62571.1	0.274345	0	0.00368003	-6.87956	down
MSTRG.183020.1	MSTRG.183020.1	0.379157	0	0.00368003	-6.87956	down
MSTRG.80134.1	MSTRG.80134.1	0.238521	0	0.00368003	-6.87956	down
MSTRG.164944.1	MSTRG.164944.1	0.234591	0	0.00368003	-6.87956	down
MSTRG.192184.1	MSTRG.192184.1	0.353534	0	0.00368003	-6.87956	down
MSTRG.28749.1	MSTRG.28749.1	0.342192	0	0.00368003	-6.87956	down
MSTRG.170916.1	MSTRG.170916.1	0.204992	0	0.00368003	-6.87956	down
ENST00000504082	AC004069.2-001	0.248496	0	0.00368003	-6.87956	down
ENST00000552061	RP3-405J10.3-001	0.030722	0	0.00368003	-6.87956	down
ENST00000601293	LINC01224-003	0.258202	0	0.00368003	-6.87956	down
ENST00000432272	RP13-297E16.4-002	0.370787	0	0.00368003	-6.87956	down
ENST00000634846	GS1-590J6.3-001	0.072277	0	0.00368003	-6.87956	down
ENST00000419296	LINC01123-003	0.058248	0	0.00368003	-6.87956	down
ENST00000442428	RP11-272P10.2-001	0.300097	0	0.00368003	-6.87956	down
ENST00000586954	LINC00662-006	0.063927	0	0.00368003	-6.87956	down
ENST00000380990	LINC00898-001	0.033665	0	0.00368003	-6.87956	down
ENST00000608926	RP1-90G24.11-001	0.314641	0	0.00368003	-6.87956	down
ENST00000531305	ALG9-IT1-001	0.20684	0	0.00368003	-6.87956	down
ENST00000604082	RP11-230C9.4-001	0.314718	0	0.00368003	-6.87956	down
ENST00000563557	RP11-432I5.4-001	0.136632	0	0.00368003	-6.87956	down
ENST00000564585	RP11-982M15.8-001	0.038102	0	0.00368003	-6.87956	down
MSTRG.57227.1	MSTRG.57227.1	0.484141	0	0.00481584	-6.78727	down
MSTRG.204475.2	MSTRG.204475.2	0.183483	0	0.00481584	-6.78727	down
MSTRG.63973.1	MSTRG.63973.1	0.254148	0	0.00481584	-6.78727	down
MSTRG.130601.1	MSTRG.130601.1	0.198698	0	0.00481584	-6.78727	down
MSTRG.90776.1	MSTRG.90776.1	0.387384	0	0.00481584	-6.78727	down
MSTRG.177322.1	MSTRG.177322.1	0.210667	0	0.00481584	-6.78727	down
MSTRG.115943.1	MSTRG.115943.1	0.238078	0	0.00481584	-6.78727	down
MSTRG.24103.1	MSTRG.24103.1	0.374834	0	0.00481584	-6.78727	down
MSTRG.183908.1	MSTRG.183908.1	0.400725	0	0.00481584	-6.78727	down
MSTRG.127483.1	MSTRG.127483.1	0.178974	0	0.00481584	-6.78727	down
MSTRG.210232.1	MSTRG.210232.1	0.173269	0	0.00481584	-6.78727	down
ENST00000587085	LINC01320-003	0.151094	0	0.00481584	-6.78727	down
ENST00000578216	RP11-334E6.12-001	0.202446	0	0.00481584	-6.78727	down
ENST00000559041	RP11-429B14.1-001	0.266911	0	0.00481584	-6.78727	down
ENST00000476130	RP13-631K18.3-001	0.147046	0	0.00481584	-6.78727	down
ENST00000419899	ACAP2-IT1-001	0.1922	0	0.00481584	-6.78727	down
ENST00000635449	PRNCR1-001	0.010005	0	0.00481584	-6.78727	down
ENST00000598988	CTC-435M10.10-001	0.245033	0	0.00481584	-6.78727	down
ENST00000617746	CH507-24F1.2-002	0.152892	0	0.00481584	-6.78727	down
ENST00000578408	RP11-466A19.8-001	0.140171	0	0.00481584	-6.78727	down
ENST00000616527	MALAT1-012	0.223434	0	0.00481584	-6.78727	down
ENST00000522963	PVT1-008	0.239076	0	0.00481584	-6.78727	down
ENST00000608741	RP11-107N15.1-001	0.168792	0	0.00481584	-6.78727	down
ENST00000555990	RP11-594C13.2-001	0.369527	0	0.00481584	-6.78727	down
ENST00000566325	RP11-27M24.2-001	0.311552	0	0.00481584	-6.78727	down
ENST00000366713	IBA57-AS1-001	0.289946	0	0.00481584	-6.78727	down
ENST00000445604	RP11-262H14.3-001	0.084066	0	0.00481584	-6.78727	down
ENST00000559299	RP11-276M12.1-001	0.248178	0	0.00481584	-6.78727	down
ENST00000418954	AF127936.7-003	0.188916	0	0.00481584	-6.78727	down
MSTRG.79627.6	MSTRG.79627.6	91.2664	0.8949	7.16e-10	-6.67391	down
ENST00000623050	RP11-717F1.2-005	1.32295	0.008017	8.72e-08	-6.51299	down
ENST00000455565	CRHR1-IT1-005	0.767198	0.006702	1.23e-07	-6.43058	down
ENST00000428207	MAPKAPK5-AS1-001	0.452869	0.002501	1.37e-06	-6.41386	down
MSTRG.50837.3	MSTRG.50837.3	0.381652	0.001641	1.61e-06	-6.37577	down
ENST00000526453	RP11-110I1.12-001	0.657622	0.002575	3.26e-06	-6.198	down
MSTRG.79627.2	MSTRG.79627.2	53.162	0.754483	3.82e-09	-6.14084	down
MSTRG.212108.2	MSTRG.212108.2	0.397585	0.000488	5.86e-06	-6.04461	down
ENST00000340510	LINC00265-001	0.502766	0.004656	5.81e-07	-6.04383	down
MSTRG.181470.12	MSTRG.181470.12	1.38415	0.018973	4.94e-07	-5.80052	down
ENST00000584339	RP11-649A18.5-001	1.65057	0.008198	1.65e-05	-5.75918	down
ENST00000442383	OSER1-AS1-001	0.438328	0.000384	1.79e-05	-5.73932	down
ENST00000562983	RP11-399O19.9-001	0.990984	0.012177	2.21e-06	-5.70935	down
ENST00000602277	RP6-99M1.3-001	1.17843	0.004376	2.3e-05	-5.67804	down
ENST00000601911	CTC-246B18.8-001	0.712816	0.000721	2.3e-05	-5.67804	down
MSTRG.83312.1	MSTRG.83312.1	1.60455	0.018105	2.5e-05	-5.65702	down
MSTRG.13224.2	MSTRG.13224.2	0.230799	0.00035	2.5e-05	-5.65702	down
MSTRG.10870.2	MSTRG.10870.2	0.477732	0.008478	3.62e-07	-5.62147	down
MSTRG.178366.1	MSTRG.178366.1	0.605434	0.008154	1.05e-06	-5.6074	down
MSTRG.82927.1	MSTRG.82927.1	1.14909	0.023757	1.28e-06	-5.41748	down
MSTRG.44662.1	MSTRG.44662.1	4.67564	0.103013	2.3e-06	-5.41651	down
MSTRG.63078.1	MSTRG.63078.1	6.56297	0.160868	6e-07	-5.34877	down
MSTRG.140470.1	MSTRG.140470.1	0.496225	0.011899	9.49e-06	-5.3302	down
ENST00000539116	RP11-221N13.3-002	0.832787	6.6e-05	8.57e-05	-5.3252	down
MSTRG.105228.1	MSTRG.105228.1	0.743157	0.011311	1.07e-05	-5.30195	down
ENST00000455557	AC108676.1-001	2.64543	0.066887	2.78e-07	-5.29721	down
ENST00000443596	MAPKAPK5-AS1-004	1.84025	0.047882	4.55e-06	-5.24416	down
ENST00000609303	RP11-339B21.11-001	2.27759	0.049465	5.01e-06	-5.21346	down
ENST00000613584	RP11-196G11.5-002	4.15855	0.09829	5.96e-06	-5.17382	down
ENST00000559321	CTD-2147F2.1-002	0.965164	0.001865	0.000147935	-5.15573	down
ENST00000623655	ERICD-001	2.43049	0.068253	1.12e-06	-5.07458	down
ENST00000623374	CH507-338C24.1-001	0.101649	0.00153	2.63e-05	-5.07035	down
ENST00000635177	RP11-596C23.6-001	0.688252	0.011922	3.02e-05	-5.0192	down
MSTRG.62348.1	MSTRG.62348.1	0.26647	0.005376	1.06e-05	-5.01512	down
ENST00000454935	OLMALINC-001	2.91164	0.089355	7.87e-07	-4.99542	down
ENST00000562848	AC012531.25-001	0.271783	0.008315	3.48e-05	-4.98407	down
MSTRG.170734.1	MSTRG.170734.1	0.864023	0.025533	1.38e-06	-4.96849	down
ENST00000605513	RP11-10C24.1-001	1.97126	0.041947	1.37e-05	-4.94245	down
ENST00000612462	AP001372.2-201	0.413021	0.012462	0.000347793	-4.92902	down
ENST00000635124	RP11-11M20.4-001	0.848672	0.023317	1.63e-05	-4.92058	down
ENST00000530595	AP000662.4-001	0.367179	0.008014	1.6e-05	-4.90469	down
ENST00000610008	RP11-259N19.1-001	1.72564	0.052945	5.19e-06	-4.87437	down
MSTRG.201552.1	MSTRG.201552.1	0.404094	0.012492	0.000521585	-4.78144	down
ENST00000610217	CTA-268H5.12-001	1.04586	0.023217	0.000521585	-4.78144	down
ENST00000587933	RP11-845C23.2-001	0.297931	0.004941	0.000521585	-4.78144	down
MSTRG.1657.3	MSTRG.1657.3	0.557299	0.016089	2.64e-05	-4.77118	down
ENST00000620274	RP11-454E5.4-001	1.36146	0.049794	2.94e-05	-4.75915	down
ENST00000562834	RP3-523K23.2-001	0.783078	0.026699	1.75e-05	-4.75178	down
ENST00000570130	RP11-480A16.1-001	1.18959	0.041583	3.72e-06	-4.74488	down
ENST00000602615	RP11-248J18.3-001	0.657544	0.019833	0.000600631	-4.74206	down
ENST00000588369	CTD-2293H3.1-001	0.499488	0.018266	8.85e-05	-4.73215	down
ENST00000501211	RP11-282K24.3-001	0.271275	0.008294	2.18e-05	-4.69903	down
ENST00000332012	LINC00482-001	0.290465	0.009588	0.000114341	-4.66719	down
ENST00000603949	SMC2-AS1-001	0.457721	0.000665	0.000804374	-4.65992	down
ENST00000437916	RP11-89K21.1-001	0.104044	0.00048	0.000935753	-4.61703	down
MSTRG.21299.1	MSTRG.21299.1	0.699491	0.0281	5.12e-05	-4.61323	down
MSTRG.96818.1	MSTRG.96818.1	0.331835	0.012871	0.00109265	-4.57282	down
MSTRG.71742.1	MSTRG.71742.1	0.484856	0.00263	0.00109265	-4.57282	down
MSTRG.126817.1	MSTRG.126817.1	0.465011	0.013637	0.00109265	-4.57282	down
ENST00000561521	LINC00662-001	0.514426	0.01806	4.47e-05	-4.50784	down
ENST00000610408	AC159540.1-001	0.094219	3e-06	0.00150764	-4.48012	down
ENST00000621449	RP11-391H12.8-001	0.529015	0.014788	0.00150764	-4.48012	down
MSTRG.120772.1	MSTRG.120772.1	1.06055	0.046289	0.000217408	-4.47814	down
ENST00000604982	RP11-10C24.3-001	1.17664	0.045317	3.45e-05	-4.46793	down
ENST00000620414	RP11-9E17.1-001	2.94462	0.132223	5.57e-06	-4.46506	down
ENST00000446626	RP11-211N8.2-001	0.11566	0.004437	0.00150764	-4.43144	down
ENST00000541870	RP11-274J7.2-001	0.499732	0.012735	0.00150764	-4.43144	down
ENST00000534336	MALAT1-001	150.182	7.09757	3.77e-06	-4.42187	down
ENST00000622671	RP11-707G18.1-001	0.435674	0.009896	0.00178229	-4.38105	down
ENST00000565433	RP11-800A3.4-001	1.99183	0.099693	9.13e-06	-4.33452	down
ENST00000623670	LINC01465-201	0.878048	0.040133	0.000135681	-4.33329	down
ENST00000444816	SNHG11-002	0.388216	0.015967	0.00211657	-4.32884	down
ENST00000313807	EIF3J-AS1-001	0.311337	0.012136	0.000155342	-4.31222	down
MSTRG.20303.1	MSTRG.20303.1	0.323456	0.004089	0.00252567	-4.27468	down
ENST00000582881	RP11-68I3.11-001	0.809259	0.042505	0.000196561	-4.23756	down
MSTRG.117295.1	MSTRG.117295.1	0.387689	0.015588	0.000496089	-4.23086	down
ENST00000441167	XXbac-B476C20.13-001	0.165711	0.007414	0.000620821	-4.16964	down
ENST00000619370	RP5-1056H1.2-001	0.111599	0.003163	0.00365261	-4.15983	down
ENST00000620124	RP4-620E11.8-001	0.308439	0.008192	0.00442948	-4.09879	down
MSTRG.170745.14	MSTRG.170745.14	0.221785	0.012896	0.000138299	-4.08802	down
ENST00000568248	AC083843.1-001	0.120644	0.006996	0.000369019	-4.05829	down
MSTRG.206367.1	MSTRG.206367.1	0.493974	0.026029	0.000997265	-4.0388	down
ENST00000566898	FAM157C-013	0.671511	0.023033	0.000997265	-4.0388	down
MSTRG.200648.1	MSTRG.200648.1	0.173137	0.001988	0.0054041	-4.03504	down
ENST00000561973	RP6-201G10.2-001	0.134475	0.003383	0.0054041	-4.03504	down
ENST00000609475	CTA-390C10.10-001	0.763481	0.044974	5.25e-05	-4.0153	down
ENST00000414584	LINC00152-006	1.39992	0.078208	0.000191981	-4.00565	down
ENST00000586061	AC006273.5-001	0.872765	0.050247	0.000451574	-4.00527	down
ENST00000602900	RP11-159N11.4-001	0.582149	0.019679	0.00112921	-4.00415	down
ENST00000490920	RP11-706O15.1-004	1.95765	0.113327	0.000113758	-3.9967	down
MSTRG.199531.1	MSTRG.199531.1	24.002	1.4845	3.16e-05	-3.99462	down
ENST00000436880	MIR181A1HG-003	0.234575	0.009687	0.000426839	-3.99294	down
ENST00000563205	RP11-363E7.4-001	0.272985	0.011378	0.000467231	-3.96875	down
ENST00000565519	RP11-384L8.1-001	0.188919	0.011744	0.00112921	-3.96865	down
ENST00000606384	RP11-182L21.5-001	0.118224	0.006822	0.00663559	-3.96835	down
ENST00000435947	SNHG5-003	0.261509	0.004764	0.00663559	-3.96835	down
MSTRG.26190.1	MSTRG.26190.1	0.459964	0.02899	6.91e-05	-3.96389	down
MSTRG.122877.8	MSTRG.122877.8	0.831071	0.052135	7.67e-05	-3.93846	down
MSTRG.83315.1	MSTRG.83315.1	0.260909	0.009053	0.0012818	-3.93225	down
MSTRG.65862.1	MSTRG.65862.1	0.241701	0.014199	0.0012818	-3.93225	down
MSTRG.10985.1	MSTRG.10985.1	0.685902	0.039235	0.00820351	-3.89843	down
ENST00000607698	RP3-465N24.6-001	0.357519	0	0.00820351	-3.89843	down
ENST00000527564	FLJ20021-001	0.641507	0.028301	0.000617763	-3.89364	down
ENST00000612818	RP11-423G4.10-001	0.506701	0.019368	0.00166464	-3.85657	down
MSTRG.107053.1	MSTRG.107053.1	0.451607	0.029406	0.000742826	-3.85354	down
MSTRG.1657.7	MSTRG.1657.7	0.847159	0.056521	0.000160663	-3.84725	down
ENST00000614098	RP11-127I20.8-001	1.16602	0.078761	0.000212148	-3.83151	down
MSTRG.207795.1	MSTRG.207795.1	0.924161	0.058542	0.000351643	-3.8253	down
ENST00000591338	LINC00662-007	0.747877	0.051279	0.0019049	-3.81719	down
ENST00000616815	AP001505.10-001	11.1802	0.805651	6.58e-05	-3.80644	down
MSTRG.157181.7	MSTRG.157181.7	0.490924	0.027191	0.000931068	-3.79226	down
MSTRG.95030.6	MSTRG.95030.6	0.411364	0.020777	0.00218621	-3.77671	down
ENST00000417786	RP11-1086F11.1-001	0.159954	0.010695	0.00218621	-3.77671	down
MSTRG.209936.1	MSTRG.209936.1	0.404065	0.023249	0.000914836	-3.75906	down
ENST00000614292	LINC01138-004	0.193056	0.012096	0.0128214	-3.74752	down
ENST00000600527	LINC00969-031	0.358659	0.018544	0.00251672	-3.73505	down
ENST00000502001	MIR4458HG-001	3.89896	0.291435	0.000109201	-3.71214	down
ENST00000614749	RP5-1057I20.6-001	2.24093	0.154106	0.000338479	-3.70236	down
ENST00000439943	OSER1-AS1-002	2.19907	0.164018	0.000117455	-3.70187	down
MSTRG.207901.3	MSTRG.207901.3	0.235821	0.00669	0.0128214	-3.6657	down
ENST00000615581	RP11-66H6.4-001	0.316327	0.023338	0.0128214	-3.6657	down
ENST00000634836	RP11-776H12.1-002	0.0475	0.000485	0.0128214	-3.6657	down
ENST00000606640	CTB-181H17.1-001	0.321431	0.024297	0.00150065	-3.66128	down
ENST00000439875	FAM225B-002	1.00069	0.080155	0.000105399	-3.65741	down
MSTRG.98626.1	MSTRG.98626.1	0.262779	0.019148	0.00139033	-3.64155	down
ENST00000606743	XXbac-BPG181B23.7-001	0.467066	0.037047	0.00163075	-3.63825	down
MSTRG.1657.4	MSTRG.1657.4	1.06363	0.084419	0.000174091	-3.63518	down
ENST00000371162	MIR4435-2HG-021	1.06372	0.084458	0.000228419	-3.61861	down
MSTRG.81920.2	MSTRG.81920.2	0.258711	0.016346	0.00155059	-3.61061	down
ENST00000445088	RP1-63G5.7-001	0.210288	0.014368	0.00155059	-3.61061	down
ENST00000609424	RP11-674N23.4-001	0.428532	0.02809	0.00391564	-3.60234	down
ENST00000609407	RP11-351D16.3-001	0.357077	0.028493	0.00177408	-3.59105	down
ENST00000562262	CTC-457E21.1-001	0.119953	0.006664	0.00173261	-3.579	down
MSTRG.64020.1	MSTRG.64020.1	0.288187	0.001496	0.0162256	-3.57896	down
MSTRG.178093.2	MSTRG.178093.2	0.228902	0.009953	0.0162256	-3.57896	down
ENST00000444042	CYP4A22-AS1-001	0.155797	0.003075	0.0162256	-3.57896	down
ENST00000492922	LINC00960-002	0.374284	0.02935	0.000872758	-3.57085	down
ENST00000449307	GS1-124K5.11-001	0.166343	0.013969	0.000465256	-3.55701	down
MSTRG.71652.1	MSTRG.71652.1	0.266866	0.020176	0.00456939	-3.55525	down
MSTRG.96276.1	MSTRG.96276.1	0.606325	0.036012	0.00456939	-3.55525	down
ENST00000609898	RP11-285G1.14-001	0.493386	0.028669	0.00456939	-3.55525	down
ENST00000533220	AP001258.4-002	0.505433	0.039726	0.00456939	-3.55525	down
ENST00000609701	RP11-888D10.4-001	0.392025	0.022291	0.0019398	-3.54668	down
ENST00000566949	RP5-1042I8.7-001	0.288796	0.016452	0.0019398	-3.54668	down
MSTRG.183237.1	MSTRG.183237.1	0.524236	0.044449	0.0021068	-3.54226	down
ENST00000399091	AC007952.5-002	0.88147	0.069986	0.000588046	-3.53544	down
ENST00000603385	RP11-258C19.7-001	0.919793	0.079855	0.000411532	-3.53276	down
ENST00000450589	GAS5-001	2.63271	0.21584	0.000424367	-3.5249	down
ENST00000439362	MIR4435-2HG-004	2.4988	0.215448	0.000201298	-3.52001	down
MSTRG.66764.12	MSTRG.66764.12	0.277546	0.024327	0.0025138	-3.49175	down
MSTRG.172497.1	MSTRG.172497.1	0.217655	0.019109	0.0207172	-3.48666	down
ENST00000508878	LINC01184-004	0.131538	0.005563	0.0207172	-3.48666	down
ENST00000452181	RP1-90G24.6-001	0.224031	0.000356	0.0207172	-3.48666	down
ENST00000602988	RP11-214K3.21-001	0.240556	0.004313	0.0207172	-3.48666	down
ENST00000573167	BAIAP2-AS1-002	3.71935	0.334615	0.000161263	-3.48219	down
MSTRG.34796.1	MSTRG.34796.1	0.276089	0.016355	0.00244656	-3.47978	down
ENST00000439488	LINC01134-001	0.195603	0.014702	0.00244656	-3.47978	down
ENST00000473756	LINC00973-001	1.92311	0.173188	0.000416091	-3.47673	down
ENST00000538077	LINC00346-001	0.117742	0.010706	0.0011935	-3.46914	down
MSTRG.12642.1	MSTRG.12642.1	0.316827	0.028793	0.002751	-3.46582	down
ENST00000594299	CTB-102L5.7-001	0.454711	0.036829	0.000978199	-3.46253	down
MSTRG.176061.1	MSTRG.176061.1	0.278413	0.024732	0.00535262	-3.45618	down
ENST00000622268	RP11-426C22.8-001	0.456443	0.036926	0.00535262	-3.45618	down
MSTRG.84770.1	MSTRG.84770.1	0.584791	0.05402	0.00301445	-3.43941	down
MSTRG.83566.1	MSTRG.83566.1	0.773375	0.070118	0.000409266	-3.43227	down
ENST00000602954	RP11-248J18.2-001	1.43367	0.130532	0.000874528	-3.4306	down
ENST00000607250	CTD-2035E11.5-001	0.340746	0.025838	0.00311281	-3.40962	down
MSTRG.164203.1	MSTRG.164203.1	0.314301	0.028923	0.00629519	-3.40398	down
MSTRG.169241.1	MSTRG.169241.1	0.192249	0.011761	0.00629519	-3.40398	down
ENST00000420866	LINC01305-001	0.077604	0.007159	0.00629519	-3.40398	down
ENST00000530479	RP11-261P9.4-001	0.422162	0.029507	0.00629519	-3.40398	down
ENST00000434051	FAM225A-002	1.81047	0.173197	0.000235858	-3.39638	down
MSTRG.49719.1	MSTRG.49719.1	1.24009	0.115332	0.00363393	-3.38511	down
ENST00000454635	LINC00963-006	0.516132	0.048371	0.00363393	-3.38511	down
ENST00000486571	RP11-706O15.1-008	0.768868	0.072399	0.00165868	-3.37853	down
MSTRG.214054.2	MSTRG.214054.2	0.941452	0.089779	0.000650551	-3.37082	down
MSTRG.1865.1	MSTRG.1865.1	0.355754	0.033013	0.00177523	-3.3597	down
MSTRG.91902.1	MSTRG.91902.1	0.315506	0.029638	0.00399816	-3.35717	down
ENST00000609194	RP5-943J3.2-001	0.334569	0.032062	0.00743482	-3.34981	down
MSTRG.179124.1	MSTRG.179124.1	0.319435	0.030198	0.00190135	-3.34063	down
ENST00000602510	AP000654.4-001	0.376964	0.036316	0.00399816	-3.32868	down
ENST00000443467	MIR4435-2HG-015	2.69165	0.261553	0.000496603	-3.32844	down
ENST00000607307	RP4-758J18.13-001	1.66684	0.162947	0.000542118	-3.3204	down
ENST00000400362	BX322557.10-002	2.04306	0.202452	0.00046163	-3.31829	down
ENST00000612598	RP11-12G12.7-001	2.40019	0.234325	0.000544572	-3.3047	down
ENST00000558188	CTD-2054N24.2-003	0.376734	0.028273	0.00881945	-3.29353	down
ENST00000559779	RP11-430B1.2-002	0.243899	0.018146	0.00881945	-3.29353	down
ENST00000624368	RP11-717F1.2-004	0.195754	0.019605	0.00881945	-3.29353	down
ENST00000617004	LL21NC02-21A1.1-001	1.34577	0.120418	0.0017712	-3.28527	down
MSTRG.77529.1	MSTRG.77529.1	0.381769	0.038636	0.000806647	-3.28382	down
MSTRG.67581.1	MSTRG.67581.1	0.34198	0.029521	0.00486085	-3.26995	down
ENST00000603827	MIR4435-2HG-019	0.272075	0.02255	0.00486085	-3.26995	down
ENST00000624682	CTB-193M12.5-001	19.0728	1.99834	0.000344386	-3.26965	down
ENST00000629870	EBLN3-003	0.339794	0.030713	0.00454775	-3.25817	down
ENST00000583253	RP11-715F3.2-001	0.307474	0.027707	0.00454775	-3.25817	down
MSTRG.93142.2	MSTRG.93142.2	0.723279	0.069461	0.00114404	-3.25497	down
MSTRG.94667.2	MSTRG.94667.2	6.6484	0.702974	0.000382927	-3.25315	down
ENST00000592873	FAM95B1-002	0.089406	0.007942	0.00537177	-3.23966	down
MSTRG.145378.1	MSTRG.145378.1	0.383005	0.030973	0.0105104	-3.23496	down
ENST00000597755	AC003104.1-001	0.141052	0.014895	0.0105104	-3.23496	down
ENST00000537068	SNHG1-025	0.341082	0.022163	0.0105104	-3.23496	down
ENST00000621778	RP11-138H8.8-001	0.370704	0.030799	0.0105104	-3.23496	down
ENST00000514146	TRIM52-AS1-002	3.20375	0.334334	0.000687249	-3.2262	down
MSTRG.72183.1	MSTRG.72183.1	0.912011	0.089502	0.00107543	-3.22572	down
ENST00000552334	PWAR6-001	0.246285	0.024207	0.00107543	-3.22572	down
ENST00000513358	RP11-253E3.3-001	10.3198	1.11776	0.000389446	-3.22265	down
MSTRG.122876.1	MSTRG.122876.1	10.2308	1.10916	0.000416497	-3.22109	down
MSTRG.13224.1	MSTRG.13224.1	0.117679	0.012307	0.00518687	-3.21768	down
ENST00000602262	AD000684.2-001	0.694566	0.071615	0.00243639	-3.17853	down
ENST00000533506	LINC01588-011	0.386878	0.035137	0.00433177	-3.17777	down
MSTRG.115762.1	MSTRG.115762.1	0.316142	0.026395	0.00659149	-3.17711	down
MSTRG.123290.3	MSTRG.123290.3	0.232336	0.017111	0.00593201	-3.17603	down
MSTRG.155267.1	MSTRG.155267.1	0.440611	0.045102	0.00593201	-3.17603	down
MSTRG.142107.1	MSTRG.142107.1	0.261078	0.028737	0.0125866	-3.17392	down
MSTRG.17436.1	MSTRG.17436.1	0.428704	0.045458	0.0125866	-3.17392	down
ENST00000608677	RP4-539M6.20-001	0.500634	0.030108	0.0125866	-3.17392	down
ENST00000597683	CTD-2017D11.1-002	1.20497	0.134371	0.000911122	-3.15797	down
ENST00000606242	AC006273.5-002	0.844783	0.081437	0.00338648	-3.15656	down
MSTRG.87861.1	MSTRG.87861.1	0.30915	0.03083	0.00731957	-3.14479	down
MSTRG.18170.4	MSTRG.18170.4	0.54471	0.057722	0.00731957	-3.14479	down
MSTRG.85526.1	MSTRG.85526.1	0.354083	0.039571	0.00731957	-3.14479	down
MSTRG.190771.2	MSTRG.190771.2	0.431393	0.04961	0.00195832	-3.13508	down
MSTRG.40663.1	MSTRG.40663.1	0.337653	0.038753	0.00365363	-3.13458	down
MSTRG.170916.2	MSTRG.170916.2	0.384645	0.036743	0.00365363	-3.13458	down
MSTRG.101717.11	MSTRG.101717.11	0.252342	0.021844	0.00680349	-3.13313	down
ENST00000570080	CTD-2270L9.4-001	1.57371	0.181222	0.00141033	-3.11281	down
MSTRG.103126.1	MSTRG.103126.1	0.576798	0.060164	0.0039454	-3.11226	down
MSTRG.68751.1	MSTRG.68751.1	0.610199	0.07143	0.00814195	-3.11173	down
MSTRG.61550.1	MSTRG.61550.1	0.31937	0.033328	0.0151503	-3.11018	down
ENST00000613598	CTB-96E2.10-001	0.623186	0.036772	0.0151503	-3.11018	down
MSTRG.145439.3	MSTRG.145439.3	1.43482	0.167721	0.000823183	-3.10958	down
MSTRG.155985.2	MSTRG.155985.2	0.275166	0.025619	0.00782613	-3.08893	down
MSTRG.125871.1	MSTRG.125871.1	3.50497	0.402383	0.00116902	-3.08543	down
MSTRG.69591.1	MSTRG.69591.1	0.374939	0.042565	0.00907268	-3.07789	down
MSTRG.39067.3	MSTRG.39067.3	0.421372	0.050402	0.0020368	-3.07133	down
MSTRG.124561.1	MSTRG.124561.1	0.281375	0.032591	0.0183347	-3.04349	down
MSTRG.207930.2	MSTRG.207930.2	0.241332	0.029398	0.00903024	-3.04332	down
ENST00000602718	RP1-257I20.14-001	0.685648	0.071164	0.00903024	-3.04332	down
MSTRG.149883.1	MSTRG.149883.1	0.355183	0.032263	0.0101281	-3.04324	down
MSTRG.146991.1	MSTRG.146991.1	0.575207	0.066012	0.0101281	-3.04324	down
MSTRG.30944.1	MSTRG.30944.1	0.314629	0.032303	0.00461358	-3.04315	down
ENST00000615939	CTD-3131K8.2-005	0.732996	0.076213	0.00461358	-3.04315	down
MSTRG.62344.1	MSTRG.62344.1	1.12709	0.136802	0.00190143	-3.0311	down
ENST00000607496	RP11-565F19.2-001	0.414773	0.047089	0.00220961	-3.01687	down
MSTRG.180910.1	MSTRG.180910.1	0.629759	0.077713	0.00679059	-3.01469	down
MSTRG.95667.1	MSTRG.95667.1	0.483674	0.049863	0.0113275	-3.00773	down
ENST00000561507	RP11-1024P17.1-001	0.186897	0.023338	0.0113275	-3.00773	down
ENST00000409054	LINC00152-005	2.1839	0.267615	0.00136847	-3.00528	down
ENST00000621974	RP11-323F24.3-001	0.449093	0.055064	0.0104531	-2.99623	down
ENST00000419736	MIR4435-2HG-006	0.688336	0.083	0.00541581	-2.99517	down
ENST00000564650	RP11-529E10.6-001	1.83573	0.233012	0.00181883	-2.98617	down
ENST00000609218	CTD-3216D2.5-001	1.05409	0.1285	0.00451565	-2.98096	down
MSTRG.38444.1	MSTRG.38444.1	0.293493	0.024971	0.0223148	-2.97356	down
MSTRG.67161.1	MSTRG.67161.1	0.230561	0.023229	0.0223148	-2.97356	down
MSTRG.114761.1	MSTRG.114761.1	0.323448	0.03894	0.0223148	-2.97356	down
ENST00000583643	RP11-720N19.2-001	0.41498	0.051995	0.0223148	-2.97356	down
ENST00000623759	CITF22-49E9.3-001	0.198144	0.025493	0.0223148	-2.97356	down
ENST00000455995	FAM95B1-001	0.042535	0.005049	0.0223148	-2.97356	down
ENST00000508827	RP11-47I22.2-001	0.035633	0.004323	0.0223148	-2.97356	down
ENST00000432411	AP001619.2-001	0.399873	0.036012	0.0223148	-2.97356	down
ENST00000611566	RP11-474P2.5-001	0.480611	0.050426	0.0223148	-2.97356	down
ENST00000503051	USP46-AS1-001	0.336487	0.042667	0.0113275	-2.97133	down
ENST00000586949	RP11-879F14.2-001	5.14356	0.666276	0.00133017	-2.96339	down
MSTRG.448.1	MSTRG.448.1	0.332631	0.028554	0.0121407	-2.94754	down
ENST00000609669	RP11-359K18.4-001	0.519925	0.053056	0.0121407	-2.94754	down
ENST00000451884	MIR4435-2HG-014	3.82189	0.476375	0.00197735	-2.94141	down
MSTRG.120768.1	MSTRG.120768.1	0.625452	0.07891	0.0126934	-2.93399	down
ENST00000562942	FAM95C-001	0.403612	0.052828	0.0126934	-2.93399	down
MSTRG.169368.1	MSTRG.169368.1	1.62953	0.215884	0.00694101	-2.92006	down
MSTRG.128108.12	MSTRG.128108.12	0.432754	0.052807	0.0047346	-2.91294	down
MSTRG.91908.1	MSTRG.91908.1	0.421171	0.05699	0.0273221	-2.90008	down
MSTRG.123904.1	MSTRG.123904.1	0.277909	0.031621	0.00996302	-2.89474	down
ENST00000623686	C1orf229-001	0.221021	0.029672	0.00755563	-2.89413	down
ENST00000598322	CTD-3099C6.9-001	7.38375	1.01012	0.00129303	-2.88482	down
MSTRG.79627.4	MSTRG.79627.4	2.96802	0.402404	0.00164771	-2.87964	down
ENST00000604070	RP3-368A4.6-001	0.574881	0.078793	0.00215201	-2.87939	down
ENST00000609242	RP11-108L7.15-001	0.99907	0.129774	0.00313348	-2.87928	down
MSTRG.34101.1	MSTRG.34101.1	0.352282	0.048067	0.00383867	-2.87696	down
ENST00000458392	FAM215B-001	0.372202	0.050298	0.00383867	-2.87696	down
ENST00000600223	CTD-2291D10.4-002	1.30629	0.16401	0.00435765	-2.87541	down
ENST00000614046	RP11-147L13.15-001	1.85369	0.253635	0.00176659	-2.87038	down
MSTRG.93932.1	MSTRG.93932.1	0.354696	0.045327	0.00823383	-2.86772	down
MSTRG.16627.1	MSTRG.16627.1	0.345562	0.047856	0.00823383	-2.86772	down
MSTRG.162802.1	MSTRG.162802.1	0.221585	0.026839	0.0110046	-2.86313	down
MSTRG.24586.1	MSTRG.24586.1	0.474895	0.05367	0.0110046	-2.86313	down
MSTRG.176176.1	MSTRG.176176.1	0.465254	0.051036	0.0160355	-2.85628	down
MSTRG.4659.14	MSTRG.4659.14	0.416592	0.051	0.00705773	-2.84798	down
ENST00000441587	ALMS1-IT1-001	0.713759	0.100261	0.00276109	-2.8408	down
MSTRG.9291.1	MSTRG.9291.1	0.837901	0.117894	0.00186576	-2.83926	down
ENST00000630558	SPRY4-IT1-001	6.60307	0.93332	0.00184424	-2.83321	down
MSTRG.213854.1	MSTRG.213854.1	0.301754	0.042586	0.00579952	-2.83292	down
ENST00000442526	RP11-517P14.2-001	1.75155	0.245406	0.00321587	-2.82504	down
MSTRG.34366.1	MSTRG.34366.1	0.246179	0.033875	0.0336648	-2.82265	down
ENST00000567261	RP11-297D21.2-001	0.344648	0.046755	0.0336648	-2.82265	down
ENST00000541888	RP1-102E24.8-001	0.088327	0.012359	0.0336648	-2.82265	down
ENST00000621669	RP11-214K3.24-001	0.057449	0.007799	0.0336648	-2.82265	down
ENST00000617211	RP11-358B23.7-001	0.385318	0.053186	0.01808	-2.81579	down
MSTRG.181333.1	MSTRG.181333.1	0.771269	0.110318	0.00981205	-2.81341	down
MSTRG.35779.1	MSTRG.35779.1	0.391975	0.055091	0.00981205	-2.81341	down
ENST00000424345	LINC01410-001	0.162527	0.022899	0.00981205	-2.81341	down
MSTRG.57352.1	MSTRG.57352.1	1.60426	0.229812	0.00209416	-2.81324	down
MSTRG.56394.1	MSTRG.56394.1	2.71409	0.38989	0.002481	-2.81245	down
ENST00000426161	FLVCR1-AS1-002	5.00891	0.716384	0.00205719	-2.80317	down
ENST00000366424	AC144450.2-001	0.330948	0.042867	0.00762637	-2.80078	down
ENST00000584382	RP11-142O6.1-001	0.275327	0.036475	0.00509712	-2.79463	down
ENST00000614119	RP11-617F23.2-001	0.217965	0.021313	0.0165518	-2.79079	down
ENST00000622688	RP11-817I4.1-001	1.52131	0.214845	0.00285396	-2.78755	down
MSTRG.259.5	MSTRG.259.5	1.18823	0.170197	0.00292019	-2.78119	down
MSTRG.85551.2	MSTRG.85551.2	0.245951	0.033446	0.0149673	-2.76391	down
MSTRG.63677.1	MSTRG.63677.1	0.419781	0.062476	0.0107303	-2.75698	down
MSTRG.171560.1	MSTRG.171560.1	0.23354	0.035265	0.0336648	-2.74083	down
MSTRG.68151.1	MSTRG.68151.1	0.258971	0.039155	0.0336648	-2.74083	down
ENST00000619653	CH17-189H20.1-002	0.287396	0.025979	0.0336648	-2.74083	down
ENST00000611242	RP4-585I14.3-001	0.361299	0.053233	0.0336648	-2.74083	down
ENST00000445884	RP11-84A14.4-001	0.338563	0.050813	0.0336648	-2.74083	down
MSTRG.58894.1	MSTRG.58894.1	0.308031	0.043782	0.00486313	-2.73929	down
MSTRG.43807.1	MSTRG.43807.1	0.859879	0.129355	0.00492697	-2.73569	down
MSTRG.184932.1	MSTRG.184932.1	0.607058	0.091863	0.00465972	-2.73478	down
ENST00000560029	CRNDE-010	0.336181	0.036705	0.019435	-2.7345	down
ENST00000453953	RP13-297E16.5-001	0.535106	0.078144	0.0231368	-2.73124	down
ENST00000542821	RP11-989F5.3-001	0.923241	0.111906	0.0231368	-2.73124	down
ENST00000528133	RP11-727A23.4-001	0.725017	0.10075	0.00722523	-2.72566	down
MSTRG.27066.1	MSTRG.27066.1	0.613326	0.090756	0.00511617	-2.72452	down
ENST00000579554	RP11-649A18.4-001	3.33251	0.501966	0.00349726	-2.71139	down
MSTRG.80038.1	MSTRG.80038.1	0.407835	0.063336	0.00645432	-2.70731	down
MSTRG.186989.1	MSTRG.186989.1	0.5331	0.078622	0.00523547	-2.70114	down
ENST00000624822	LINC01560-201	1.56453	0.2429	0.00377922	-2.69577	down
ENST00000631190	LINC00294-001	6.33538	0.987432	0.00246034	-2.69512	down
MSTRG.96077.1	MSTRG.96077.1	0.311592	0.047742	0.018524	-2.69375	down
ENST00000427333	LINC01273-002	1.56179	0.236714	0.00619277	-2.69209	down
ENST00000381108	RP11-706O15.3-001	1.90414	0.299184	0.00300868	-2.68469	down
MSTRG.125283.2	MSTRG.125283.2	0.183761	0.025361	0.0229108	-2.67594	down
ENST00000634783	RP11-764D10.2-001	0.325751	0.034734	0.0229108	-2.67594	down
MSTRG.144733.1	MSTRG.144733.1	0.338467	0.053457	0.0102953	-2.6582	down
MSTRG.190945.1	MSTRG.190945.1	0.315961	0.046998	0.018524	-2.65735	down
ENST00000565861	RP11-325K4.3-001	0.581385	0.074598	0.018524	-2.65735	down
MSTRG.65950.1	MSTRG.65950.1	0.347984	0.048323	0.0417569	-2.65409	down
ENST00000613153	RP11-54G14.1-001	0.313469	0.038003	0.0417569	-2.65409	down
ENST00000560378	RP11-30K9.4-001	0.266315	0.04208	0.0417569	-2.65409	down
ENST00000439494	MIR4435-2HG-010	0.193199	0.023204	0.0417569	-2.65409	down
ENST00000553312	RP11-280K24.4-001	0.024275	0.003725	0.0417569	-2.65409	down
MSTRG.122486.1	MSTRG.122486.1	0.345766	0.051279	0.00578185	-2.65396	down
ENST00000624853	RP11-540O11.8-001	0.261498	0.036178	0.0123878	-2.64914	down
MSTRG.182256.1	MSTRG.182256.1	0.251798	0.041212	0.0298844	-2.64143	down
ENST00000560049	EIF3J-AS1-002	0.429986	0.06555	0.0298844	-2.64143	down
MSTRG.63608.21	MSTRG.63608.21	1.73245	0.280159	0.00422651	-2.62368	down
ENST00000356684	FLVCR1-AS1-001	0.18884	0.030553	0.0134789	-2.62224	down
ENST00000616300	RP11-210K20.5-001	0.507547	0.082583	0.0206611	-2.62001	down
ENST00000421767	LINC00174-001	0.20125	0.031356	0.00747754	-2.61822	down
MSTRG.123138.2	MSTRG.123138.2	0.113552	0.017803	0.00699583	-2.61661	down
ENST00000555578	LINC00638-001	0.082833	0.011906	0.0271201	-2.61489	down
MSTRG.24840.1	MSTRG.24840.1	0.203987	0.03352	0.0340885	-2.59434	down
ENST00000602927	RP11-646I6.5-001	0.505318	0.072606	0.0340885	-2.59434	down
ENST00000545709	RP11-305O6.3-001	0.559025	0.092418	0.00495233	-2.59309	down
ENST00000598112	CTC-429P9.3-001	1.48909	0.248571	0.0051267	-2.5914	down
MSTRG.189875.1	MSTRG.189875.1	0.301283	0.044098	0.023086	-2.58168	down
MSTRG.116775.2	MSTRG.116775.2	3.97976	0.670188	0.00493437	-2.57939	down
MSTRG.76017.7	MSTRG.76017.7	0.347624	0.056193	0.0074182	-2.56481	down
ENST00000359941	TP53TG1-001	1.44762	0.242825	0.00655862	-2.56404	down
MSTRG.61312.1	MSTRG.61312.1	0.743234	0.115549	0.00996914	-2.55558	down
ENST00000583598	RP1-253P7.1-001	0.420069	0.054965	0.0322415	-2.55115	down
ENST00000624919	RP4-671O14.6-001	0.221439	0.038245	0.00493196	-2.54652	down
ENST00000513626	LUCAT1-002	0.98816	0.171168	0.00512066	-2.54508	down
ENST00000561956	RP11-252K23.2-001	1.02735	0.17585	0.0208084	-2.54003	down
MSTRG.132602.2	MSTRG.132602.2	0.188148	0.03216	0.0160102	-2.5384	down
MSTRG.150799.3	MSTRG.150799.3	0.366867	0.061447	0.0124961	-2.53621	down
ENST00000621883	RP11-37B2.1-006	0.236597	0.041085	0.00988984	-2.53345	down
MSTRG.57337.1	MSTRG.57337.1	0.406832	0.066787	0.00852817	-2.53282	down
ENST00000610813	RP11-196G11.5-001	3.13774	0.548801	0.00668128	-2.53113	down
MSTRG.80271.1	MSTRG.80271.1	0.546452	0.09326	0.013426	-2.51354	down
ENST00000501520	RP11-57A19.2-001	0.17941	0.027035	0.0174782	-2.50934	down
ENST00000566639	RP11-303E16.2-002	8.85911	1.56212	0.00484071	-2.50859	down
MSTRG.97037.4	MSTRG.97037.4	0.372901	0.064915	0.0230006	-2.50619	down
MSTRG.87010.4	MSTRG.87010.4	0.227152	0.038701	0.0230006	-2.50619	down
ENST00000560865	CTD-2647L4.4-001	1.59225	0.277737	0.0108851	-2.50405	down
MSTRG.11549.1	MSTRG.11549.1	0.306504	0.051348	0.00971704	-2.49999	down
MSTRG.103929.1	MSTRG.103929.1	1.25953	0.207823	0.00971704	-2.49999	down
ENST00000603748	RP11-181E10.3-001	0.170483	0.024842	0.0389831	-2.49527	down
MSTRG.27000.1	MSTRG.27000.1	1.22631	0.218984	0.00624526	-2.48831	down
ENST00000602607	RP3-426I6.5-001	1.03339	0.147026	0.0385026	-2.48446	down
ENST00000591866	AC004156.3-001	0.054918	0.009992	0.0385026	-2.48446	down
ENST00000420918	AC016747.3-001	2.819	0.507982	0.00534234	-2.47846	down
ENST00000553176	RP11-977G19.5-001	16.7842	3.04468	0.00530379	-2.47763	down
MSTRG.5026.1	MSTRG.5026.1	0.339193	0.057157	0.0254617	-2.47154	down
ENST00000618667	RP11-876N24.7-001	0.581206	0.098658	0.0254617	-2.47154	down
ENST00000426528	LL0XNC01-237H1.2-001	0.962082	0.167803	0.00990981	-2.45063	down
MSTRG.157181.2	MSTRG.157181.2	0.837347	0.154512	0.00594837	-2.44925	down
MSTRG.120577.4	MSTRG.120577.4	0.810836	0.142688	0.0104329	-2.44596	down
ENST00000625632	LINC00969-053	0.267184	0.039309	0.0446974	-2.44306	down
ENST00000595203	RP3-461P17.10-002	0.076493	0.014195	0.0446974	-2.44306	down
MSTRG.9291.2	MSTRG.9291.2	1.72733	0.314772	0.00938946	-2.43688	down
ENST00000501702	LINC01184-009	0.340902	0.063415	0.0108771	-2.43315	down
MSTRG.51087.1	MSTRG.51087.1	0.772774	0.145214	0.0133626	-2.41954	down
ENST00000569778	RP11-249C24.10-001	1.1957	0.207327	0.0167306	-2.41912	down
MSTRG.210566.1	MSTRG.210566.1	0.424614	0.06761	0.0366724	-2.41726	down
MSTRG.164129.1	MSTRG.164129.1	0.674515	0.127704	0.0100964	-2.41488	down
ENST00000419680	LINC00152-008	0.26865	0.038262	0.0461955	-2.41454	down
ENST00000591484	CTD-2587H24.10-002	1.17356	0.217798	0.0135322	-2.40528	down
ENST00000565390	RP1-228H13.5-001	2.54941	0.488327	0.00682949	-2.40251	down
ENST00000568179	RP11-521L9.2-001	0.543637	0.100724	0.0282292	-2.39964	down
ENST00000618739	RP11-231E4.5-001	0.720058	0.134856	0.0282292	-2.39964	down
ENST00000456273	INE1-001	2.02506	0.380751	0.00941509	-2.39376	down
ENST00000635687	MIR34A-005	0.165008	0.030033	0.0137301	-2.39192	down
ENST00000570210	RP11-325K4.2-001	1.6479	0.304926	0.0112749	-2.38123	down
MSTRG.210568.1	MSTRG.210568.1	1.41975	0.268755	0.0128859	-2.38074	down
ENST00000562691	RP11-174G6.5-001	0.95199	0.185337	0.00738555	-2.38001	down
MSTRG.115382.1	MSTRG.115382.1	0.485402	0.094112	0.0145704	-2.37309	down
ENST00000583067	RP11-209D14.4-001	0.77265	0.134594	0.0413763	-2.37305	down
MSTRG.199562.1	MSTRG.199562.1	2.01411	0.386852	0.0090051	-2.37093	down
MSTRG.5266.1	MSTRG.5266.1	1.08113	0.210794	0.0101783	-2.36634	down
MSTRG.133131.1	MSTRG.133131.1	0.27901	0.054625	0.0182443	-2.36333	down
ENST00000425771	GAS5-020	2.3534	0.422962	0.0182443	-2.36333	down
ENST00000522875	PVT1-019	0.614415	0.114232	0.0182443	-2.36333	down
ENST00000584727	RP11-713C5.1-001	0.308742	0.06081	0.0154703	-2.35402	down
ENST00000623117	GTSE1-AS1-001	0.449003	0.08502	0.0154703	-2.35402	down
ENST00000332965	OGFRP1-001	0.770868	0.14966	0.0140484	-2.35381	down
MSTRG.84285.1	MSTRG.84285.1	0.220574	0.043648	0.0227986	-2.34862	down
MSTRG.2962.1	MSTRG.2962.1	0.364494	0.06615	0.0210039	-2.34401	down
MSTRG.199970.1	MSTRG.199970.1	1.74795	0.344423	0.0103422	-2.34191	down
ENST00000607140	RP11-254F7.4-001	1.67598	0.303715	0.0195794	-2.34029	down
ENST00000556072	RP11-488C13.5-001	1.1594	0.23143	0.0108806	-2.33623	down
MSTRG.85583.2	MSTRG.85583.2	0.484255	0.094472	0.0179686	-2.33066	down
MSTRG.62891.1	MSTRG.62891.1	0.242268	0.043471	0.0467816	-2.32745	down
ENST00000608317	PAXIP1-AS1-001	1.56572	0.314768	0.00967239	-2.32264	down
ENST00000602886	RP11-540B6.6-001	0.69865	0.141615	0.0132217	-2.32049	down
MSTRG.131933.1	MSTRG.131933.1	0.603778	0.120372	0.0248186	-2.31956	down
ENST00000613639	CTD-2095E4.5-001	0.57199	0.103989	0.0226975	-2.31808	down
MSTRG.106286.1	MSTRG.106286.1	0.476252	0.096445	0.0195794	-2.31689	down
MSTRG.58187.1	MSTRG.58187.1	0.41861	0.084104	0.0110939	-2.3089	down
ENST00000561746	RP11-819C21.1-001	0.261906	0.052276	0.0141401	-2.29953	down
ENST00000610202	RP11-299H21.1-001	0.30671	0.063097	0.0199555	-2.29677	down
MSTRG.3902.1	MSTRG.3902.1	0.271397	0.056147	0.0210279	-2.29309	down
MSTRG.116104.2	MSTRG.116104.2	0.709557	0.146302	0.00987344	-2.29063	down
ENST00000423737	RP11-191L9.4-001	0.238871	0.045171	0.0270462	-2.28989	down
MSTRG.206492.1	MSTRG.206492.1	0.397901	0.071052	0.0334134	-2.28761	down
ENST00000571975	RP11-96D1.10-001	0.357207	0.07141	0.014695	-2.28747	down
MSTRG.85023.1	MSTRG.85023.1	0.359347	0.075703	0.0388404	-2.28458	down
ENST00000620075	RP11-161M6.6-001	1.43418	0.283151	0.0167543	-2.2842	down
MSTRG.147354.4	MSTRG.147354.4	0.456842	0.088468	0.0176554	-2.27748	down
MSTRG.169029.1	MSTRG.169029.1	0.328021	0.062697	0.0210416	-2.27228	down
MSTRG.100888.1	MSTRG.100888.1	0.39035	0.079528	0.0265767	-2.26477	down
MSTRG.120667.2	MSTRG.120667.2	1.86639	0.391726	0.0128065	-2.26333	down
ENST00000511497	RP11-420A23.1-001	0.528466	0.108963	0.0158816	-2.26305	down
ENST00000566986	RP13-516M14.1-001	0.797812	0.16564	0.0176488	-2.25822	down
MSTRG.81741.1	MSTRG.81741.1	1.83864	0.385641	0.012576	-2.25388	down
MSTRG.143043.1	MSTRG.143043.1	0.629088	0.128957	0.0368442	-2.25296	down
ENST00000619744	RP11-843B15.4-001	1.78561	0.363436	0.0176488	-2.24443	down
ENST00000591936	AC006116.19-001	0.563047	0.119721	0.0433428	-2.2441	down
MSTRG.186792.2	MSTRG.186792.2	0.331149	0.063202	0.0287978	-2.23736	down
MSTRG.92988.1	MSTRG.92988.1	0.772913	0.158826	0.0210481	-2.23395	down
ENST00000600473	AC008982.2-001	1.25651	0.256775	0.0210481	-2.23395	down
ENST00000412427	RP11-380J14.1-001	0.089137	0.019078	0.0322247	-2.22867	down
MSTRG.75278.1	MSTRG.75278.1	0.839455	0.177906	0.0171795	-2.22561	down
MSTRG.114258.2	MSTRG.114258.2	0.608819	0.130203	0.0141725	-2.22449	down
MSTRG.9288.1	MSTRG.9288.1	0.275314	0.051346	0.0406832	-2.21746	down
MSTRG.124736.2	MSTRG.124736.2	0.897103	0.184199	0.0312338	-2.20942	down
MSTRG.58645.5	MSTRG.58645.5	482.217	105.943	0.0111994	-2.20506	down
MSTRG.87839.12	MSTRG.87839.12	0.189539	0.037023	0.0484502	-2.20244	down
MSTRG.60943.1	MSTRG.60943.1	0.262516	0.050861	0.0484502	-2.20244	down
ENST00000433110	RP11-4C20.4-001	0.82946	0.166812	0.0484502	-2.20244	down
MSTRG.116104.1	MSTRG.116104.1	2.05703	0.448352	0.0152294	-2.20088	down
ENST00000612833	RP11-106D4.2-001	0.746351	0.163735	0.0137539	-2.19819	down
ENST00000601752	CTC-244M17.1-001	0.669033	0.137497	0.0352338	-2.19706	down
ENST00000430643	RP11-767N6.7-001	1.01576	0.210962	0.0239022	-2.1916	down
MSTRG.166042.1	MSTRG.166042.1	0.369071	0.081128	0.0261268	-2.19003	down
ENST00000444184	LINC00963-002	2.07809	0.459597	0.0136593	-2.1889	down
ENST00000608012	RP11-1275H24.3-001	1.06137	0.236631	0.0201582	-2.17415	down
ENST00000618736	CTA-276F8.1-001	0.33064	0.073812	0.0243442	-2.17257	down
ENST00000456429	MAPKAPK5-AS1-002	0.404629	0.089089	0.0243442	-2.17257	down
MSTRG.22964.1	MSTRG.22964.1	0.199915	0.044491	0.0254941	-2.16995	down
MSTRG.205141.2	MSTRG.205141.2	0.376075	0.084778	0.0168921	-2.1683	down
MSTRG.27000.4	MSTRG.27000.4	2.98896	0.672241	0.0133776	-2.1683	down
MSTRG.131092.1	MSTRG.131092.1	0.46781	0.103867	0.0194118	-2.1682	down
ENST00000412643	RP6-109B7.4-001	0.455664	0.096495	0.0385682	-2.16474	down
MSTRG.84045.2	MSTRG.84045.2	1.20079	0.268169	0.0160857	-2.16376	down
ENST00000627071	GHET1-001	0.309875	0.070303	0.0272086	-2.14797	down
ENST00000620689	RP11-333J10.3-001	0.479491	0.094469	0.0449855	-2.14372	down
ENST00000501122	NEAT1-001	5.91724	1.35653	0.0135178	-2.14356	down
MSTRG.137863.2	MSTRG.137863.2	1.20277	0.274764	0.0224285	-2.14207	down
MSTRG.46423.1	MSTRG.46423.1	0.356862	0.081395	0.0252129	-2.14023	down
MSTRG.156202.1	MSTRG.156202.1	0.171611	0.038487	0.0268874	-2.13946	down
MSTRG.100728.1	MSTRG.100728.1	0.305957	0.065947	0.0422677	-2.13167	down
ENST00000416650	APTR-004	1.19209	0.267912	0.0287048	-2.12773	down
ENST00000413670	MIR137HG-004	7.93228	1.84197	0.0147811	-2.12166	down
MSTRG.171175.3	MSTRG.171175.3	0.187271	0.043819	0.0498142	-2.10538	down
MSTRG.39929.1	MSTRG.39929.1	0.293221	0.063893	0.0382879	-2.08715	down
ENST00000609094	RP11-61L19.3-001	0.62118	0.14151	0.0382879	-2.08715	down
ENST00000614874	RP11-180M15.7-001	1.62007	0.380502	0.0272096	-2.08129	down
ENST00000602461	MIR222HG-002	1.21617	0.288397	0.0224043	-2.07905	down
MSTRG.4088.1	MSTRG.4088.1	0.626207	0.149872	0.0235198	-2.07795	down
ENST00000515264	ZNF346-IT1-001	0.812986	0.186115	0.0303467	-2.07716	down
MSTRG.45827.1	MSTRG.45827.1	1.72867	0.416389	0.0200566	-2.07471	down
ENST00000607956	RP11-33O4.1-001	1.81645	0.429176	0.0288284	-2.0678	down
MSTRG.75237.1	MSTRG.75237.1	1.34821	0.318371	0.0266486	-2.0643	down
ENST00000609130	RP11-1275H24.2-001	0.793115	0.182541	0.0367901	-2.05776	down
MSTRG.130215.1	MSTRG.130215.1	0.644798	0.146645	0.036627	-2.05463	down
ENST00000524412	RP11-390K5.6-001	1.26913	0.30592	0.032942	-2.05318	down
ENST00000504349	RP11-155L15.1-001	0.66844	0.159294	0.0301972	-2.05206	down
ENST00000621809	RP11-417L19.6-001	3.34366	0.795633	0.0277542	-2.05077	down
MSTRG.40974.1	MSTRG.40974.1	0.41347	0.102028	0.0316408	-2.03614	down
MSTRG.25366.12	MSTRG.25366.12	0.753205	0.182519	0.0243956	-2.0324	down
ENST00000560400	RP11-156E6.1-001	3.98111	0.987629	0.0195633	-2.02907	down
MSTRG.40839.1	MSTRG.40839.1	0.555023	0.138222	0.0290168	-2.02711	down
ENST00000602697	RP11-497H16.9-001	3.31783	0.81807	0.024145	-2.02423	down
ENST00000423222	LINC00467-001	1.95294	0.486972	0.0208576	-2.02127	down
MSTRG.125054.1	MSTRG.125054.1	0.545343	0.130792	0.0325161	-2.02126	down
MSTRG.165786.3	MSTRG.165786.3	0.37981	0.094359	0.035607	-2.0187	down
ENST00000592381	RP11-1094M14.11-001	2.02984	0.502126	0.0234383	-2.01623	down
ENST00000585030	SNHG15-004	1.90961	0.470478	0.024759	-2.01156	down
MSTRG.174968.1	MSTRG.174968.1	0.308658	0.077193	0.0380311	-2.00856	down
MSTRG.195705.1	MSTRG.195705.1	0.31386	0.079247	0.0380311	-2.00856	down
ENST00000614983	RP11-295D4.4-001	1.10252	0.276632	0.0380311	-2.00856	down
ENST00000602507	MIR222HG-001	1.76712	0.442193	0.0229774	-2.00787	down
ENST00000590657	LINC00665-007	0.512171	0.126632	0.0277013	-2.00131	down
ENST00000432120	RP11-119K6.6-001	6.69088	1.70669	0.0239774	-1.98224	down
ENST00000562313	RP11-226L15.5-001	0.589998	0.148323	0.0337372	-1.97922	down
MSTRG.190412.1	MSTRG.190412.1	0.445277	0.11407	0.048606	-1.97199	down
MSTRG.118703.1	MSTRG.118703.1	0.316716	0.077488	0.048606	-1.97199	down
MSTRG.82157.1	MSTRG.82157.1	0.564987	0.146901	0.0428262	-1.96142	down
MSTRG.35114.1	MSTRG.35114.1	0.436334	0.108824	0.043682	-1.95892	down
MSTRG.120576.10	MSTRG.120576.10	7088.01	1866.17	0.0240561	-1.94399	down
ENST00000424612	AC017074.2-001	2.12205	0.538315	0.0344268	-1.94281	down
ENST00000610122	RP11-1275H24.1-001	1.00013	0.264199	0.030213	-1.93168	down
ENST00000424415	RP11-706O15.5-001	0.834072	0.220431	0.0332752	-1.9171	down
ENST00000602609	RP5-894A10.6-001	1.83982	0.493481	0.0323723	-1.91516	down
MSTRG.46795.1	MSTRG.46795.1	0.257158	0.069427	0.0412725	-1.91246	down
ENST00000610778	LL22NC03-2H8.5-001	0.215114	0.055877	0.0458717	-1.91196	down
ENST00000594318	CTD-2291D10.4-001	2.63037	0.693435	0.0346215	-1.90924	down
ENST00000612269	CTD-2553L13.10-001	1.53007	0.405889	0.0415891	-1.90096	down
MSTRG.5382.1	MSTRG.5382.1	0.816135	0.22116	0.0394403	-1.90006	down
ENST00000561847	RP11-715J22.6-001	0.20484	0.054965	0.0392206	-1.89812	down
ENST00000371086	DLEU2L-001	0.148675	0.040879	0.0477109	-1.89411	down
ENST00000610128	RP11-67L2.2-001	0.470533	0.127181	0.0335579	-1.89162	down
MSTRG.136979.1	MSTRG.136979.1	0.384276	0.101648	0.0455201	-1.86894	down
ENST00000620519	RP11-582E3.6-001	1.79724	0.49569	0.0343195	-1.86814	down
ENST00000400946	LINC01139-001	0.964376	0.26354	0.0403042	-1.85713	down
ENST00000566747	RP11-21L23.2-001	0.1891	0.05321	0.0476431	-1.85267	down
ENST00000412143	PSORS1C3-001	2.79654	0.789247	0.0393047	-1.84163	down
ENST00000435586	RP11-475I24.3-001	0.381992	0.104386	0.0484396	-1.84068	down
ENST00000570140	RP11-283I3.6-001	1.01771	0.287241	0.0364174	-1.83374	down
ENST00000503152	CTD-2201E18.3-003	1.54659	0.429163	0.0499011	-1.83165	down
ENST00000603308	LL22NC03-N64E9.1-001	1.26752	0.358722	0.042454	-1.82651	down
ENST00000568686	RP4-555D20.2-001	0.277806	0.079173	0.0443382	-1.824	down
MSTRG.169302.1	MSTRG.169302.1	0.436366	0.124574	0.048834	-1.82347	down
ENST00000606723	U91328.19-001	0.707564	0.203342	0.0410192	-1.80251	down
ENST00000545631	MIR600HG-202	0.975624	0.283253	0.0387785	-1.79878	down
ENST00000420509	AC007383.3-001	1.62219	0.473653	0.0463899	-1.79424	down
MSTRG.39375.1	MSTRG.39375.1	0.409006	0.120211	0.0464824	-1.79023	down
ENST00000414157	RP11-462L8.1-002	1.09361	0.318482	0.048632	-1.78758	down
ENST00000602760	RP11-141B14.1-001	1.49439	0.438059	0.0429358	-1.78277	down
ENST00000570440	RP11-876N24.5-001	2.03174	0.589004	0.0431606	-1.78179	down
ENST00000602652	RP11-2B6.2-001	2.94137	0.877741	0.0440261	-1.76094	down
ENST00000411553	HCG11-001	1.03964	0.307627	0.0446638	-1.7606	down
ENST00000564352	RP11-57H14.4-001	0.963794	0.292826	0.0452997	-1.73938	down
MSTRG.81911.3	MSTRG.81911.3	2.49226	8.31923	0.0466977	1.72098	up
ENST00000619319	RP4-563E14.1-001	2.39646	8.14301	0.0440788	1.74273	up
MSTRG.87361.1	MSTRG.87361.1	0.260296	0.908757	0.0487992	1.76555	up
ENST00000499732	NEAT1-002	0.657392	2.29152	0.0409165	1.78362	up
MSTRG.197077.13	MSTRG.197077.13	0.638541	2.24619	0.0426977	1.79073	up
MSTRG.144275.1	MSTRG.144275.1	0.132469	0.478391	0.0490826	1.80642	up
MSTRG.120579.9	MSTRG.120579.9	0.845262	3.04446	0.0368218	1.82431	up
ENST00000573866	RP11-160E2.6-001	32.1918	116.625	0.0324416	1.83825	up
MSTRG.194671.1	MSTRG.194671.1	0.152723	0.55972	0.039163	1.85314	up
MSTRG.32737.3	MSTRG.32737.3	0.135166	0.508924	0.0488722	1.85743	up
ENST00000593015	RP11-178C3.2-002	0.339792	1.25991	0.0422422	1.85842	up
MSTRG.114412.1	MSTRG.114412.1	0.18039	0.684355	0.0428527	1.85915	up
MSTRG.181147.1	MSTRG.181147.1	0.152499	0.579204	0.0392206	1.90149	up
MSTRG.109600.2	MSTRG.109600.2	0.1426	0.546469	0.0383073	1.9064	up
MSTRG.202185.2	MSTRG.202185.2	0.076429	0.29913	0.04364	1.90835	up
MSTRG.104023.2	MSTRG.104023.2	0.216945	0.848698	0.043682	1.917	up
MSTRG.116104.3	MSTRG.116104.3	0.21974	0.847239	0.0362707	1.92376	up
MSTRG.159910.5	MSTRG.159910.5	0.10485	0.41556	0.0428262	1.92704	up
MSTRG.41049.1	MSTRG.41049.1	0.124826	0.491783	0.0349202	1.9395	up
MSTRG.180811.2	MSTRG.180811.2	0.265867	1.03385	0.0349202	1.9395	up
MSTRG.119389.2	MSTRG.119389.2	0.162731	0.632165	0.040745	1.9473	up
MSTRG.22496.1	MSTRG.22496.1	0.252553	0.992434	0.0406049	1.94972	up
MSTRG.81911.2	MSTRG.81911.2	6.47157	25.4743	0.0236965	1.9577	up
MSTRG.64926.1	MSTRG.64926.1	0.379674	1.51784	0.0324425	1.96293	up
ENST00000563103	CTD-2651B20.6-001	0.584383	2.33885	0.038514	1.97205	up
MSTRG.206428.1	MSTRG.206428.1	0.257672	1.03091	0.0376048	1.97748	up
ENST00000613361	RP5-965G21.3-001	0.097962	0.391958	0.0307709	1.98186	up
MSTRG.34288.2	MSTRG.34288.2	0.259394	1.05352	0.0257527	1.98721	up
ENST00000609742	RP11-479G22.8-001	0.380125	1.54159	0.0235466	2.00071	up
MSTRG.123368.1	MSTRG.123368.1	0.14119	0.581673	0.0475712	2.01551	up
MSTRG.132414.2	MSTRG.132414.2	0.12903	0.5295	0.0475712	2.01551	up
MSTRG.177167.1	MSTRG.177167.1	0.107289	0.448461	0.043682	2.0156	up
MSTRG.9290.9	MSTRG.9290.9	0.062005	0.261325	0.043682	2.0156	up
MSTRG.97939.1	MSTRG.97939.1	0.798919	3.33217	0.0327338	2.02147	up
MSTRG.94671.2	MSTRG.94671.2	0.199698	0.851853	0.027455	2.02635	up
MSTRG.156189.1	MSTRG.156189.1	0.07192	0.310028	0.0498142	2.04667	up
ENST00000428895	RP11-475I24.3-002	0.050599	0.231498	0.0498142	2.04667	up
MSTRG.71925.2	MSTRG.71925.2	0.218972	0.932151	0.0239244	2.04676	up
ENST00000621084	RP4-564F22.7-001	1.54901	6.51736	0.0201077	2.04947	up
ENST00000467530	RP4-621F18.2-002	0.570547	2.40561	0.0190871	2.05047	up
MSTRG.151424.13	MSTRG.151424.13	0.597578	2.51108	0.0186811	2.05193	up
MSTRG.158714.1	MSTRG.158714.1	0.097109	0.418367	0.0253946	2.05767	up
MSTRG.176946.1	MSTRG.176946.1	0.083137	0.367588	0.0297315	2.06531	up
MSTRG.77325.1	MSTRG.77325.1	0.067146	0.308196	0.0484502	2.06761	up
ENST00000467666	RP4-621F18.2-003	0.351126	1.52192	0.0292603	2.06931	up
MSTRG.203042.1	MSTRG.203042.1	0.119687	0.508569	0.0463774	2.07132	up
MSTRG.188073.1	MSTRG.188073.1	0.135334	0.616172	0.028513	2.07691	up
ENST00000564380	RP11-834C11.11-001	0.07539	0.326227	0.0291881	2.07795	up
MSTRG.11139.2	MSTRG.11139.2	1.02999	4.44527	0.0174179	2.0852	up
MSTRG.24422.1	MSTRG.24422.1	0.129484	0.581132	0.0280341	2.08951	up
MSTRG.180846.1	MSTRG.180846.1	0.127706	0.557834	0.040082	2.09124	up
MSTRG.131439.4	MSTRG.131439.4	0.195693	0.874223	0.0225565	2.09556	up
MSTRG.65493.17	MSTRG.65493.17	0.169265	0.740276	0.0208448	2.09662	up
ENST00000634503	RP11-242D8.1-003	0.130231	0.571698	0.0228327	2.09954	up
MSTRG.97049.1	MSTRG.97049.1	0.210159	0.940798	0.0216731	2.10848	up
MSTRG.171825.3	MSTRG.171825.3	0.638921	2.86254	0.0218236	2.11184	up
ENST00000381786	C2orf48-001	0.354304	1.55316	0.0174236	2.11184	up
MSTRG.145673.1	MSTRG.145673.1	0.11805	0.531892	0.0406832	2.13655	up
MSTRG.172152.1	MSTRG.172152.1	0.132205	0.622344	0.0243442	2.13923	up
MSTRG.49565.1	MSTRG.49565.1	0.118528	0.562742	0.0354224	2.14074	up
ENST00000420776	RP11-442N24__B.1-001	0.29778	1.36423	0.0230664	2.14615	up
ENST00000606089	CTB-113I20.2-001	0.218627	0.977254	0.0352338	2.15124	up
MSTRG.64150.1	MSTRG.64150.1	0.097882	0.471417	0.0318577	2.15174	up
MSTRG.199189.1	MSTRG.199189.1	0.073569	0.339219	0.0186768	2.15759	up
MSTRG.61362.2	MSTRG.61362.2	0.161198	0.756312	0.0310489	2.16112	up
MSTRG.195500.1	MSTRG.195500.1	0.076314	0.346381	0.0388404	2.16676	up
MSTRG.205146.1	MSTRG.205146.1	0.133988	0.670976	0.049219	2.17449	up
MSTRG.204146.1	MSTRG.204146.1	0.137433	0.65609	0.0223429	2.17625	up
MSTRG.58623.1	MSTRG.58623.1	2295.71	10539.8	0.0120727	2.18014	up
ENST00000608412	RP11-138A9.2-001	0.028439	0.13234	0.0322247	2.1896	up
MSTRG.79627.3	MSTRG.79627.3	43.4136	200.851	0.0117029	2.191	up
MSTRG.123496.1	MSTRG.123496.1	0.175679	0.851829	0.0446974	2.19204	up
MSTRG.46099.1	MSTRG.46099.1	0.075476	0.344279	0.0446974	2.19204	up
MSTRG.79625.1	MSTRG.79625.1	29.9618	138.954	0.01158	2.19468	up
MSTRG.97815.1	MSTRG.97815.1	0.114373	0.548398	0.0210481	2.19469	up
MSTRG.24187.1	MSTRG.24187.1	0.155679	0.76874	0.0366724	2.20454	up
MSTRG.5684.1	MSTRG.5684.1	0.105064	0.510832	0.0193615	2.21111	up
MSTRG.11046.1	MSTRG.11046.1	0.098927	0.483139	0.0348643	2.21389	up
MSTRG.51466.1	MSTRG.51466.1	1.26302	5.97157	0.0117625	2.21882	up
MSTRG.88256.1	MSTRG.88256.1	0.061136	0.296555	0.0334134	2.22116	up
MSTRG.1636.3	MSTRG.1636.3	1.08969	5.15937	0.0110899	2.22351	up
MSTRG.95228.5	MSTRG.95228.5	0.064408	0.302863	0.0295058	2.22696	up
ENST00000610036	RP11-332H14.2-001	0.357992	1.70447	0.0113794	2.22927	up
MSTRG.88894.8	MSTRG.88894.8	0.067754	0.350333	0.0420281	2.24807	up
MSTRG.25611.1	MSTRG.25611.1	0.071453	0.406123	0.0420281	2.24807	up
MSTRG.10128.7	MSTRG.10128.7	0.058344	0.309371	0.0389831	2.25315	up
MSTRG.90645.1	MSTRG.90645.1	0.056644	0.332912	0.0389831	2.25315	up
MSTRG.189332.1	MSTRG.189332.1	0.095189	0.529944	0.0389831	2.25315	up
MSTRG.170221.1	MSTRG.170221.1	0.160146	0.817843	0.0270462	2.26339	up
MSTRG.196964.1	MSTRG.196964.1	0.103638	0.510102	0.0270462	2.26339	up
MSTRG.119383.1	MSTRG.119383.1	0.10278	0.52107	0.0270462	2.26339	up
ENST00000366221	RP5-832C2.5-001	0.328155	1.60164	0.0112145	2.26737	up
MSTRG.172152.3	MSTRG.172152.3	0.143562	0.732746	0.0174685	2.26855	up
MSTRG.173287.1	MSTRG.173287.1	0.081045	0.4288	0.0251212	2.30108	up
MSTRG.59887.1	MSTRG.59887.1	0.069881	0.364807	0.0282292	2.30377	up
MSTRG.47724.1	MSTRG.47724.1	0.046968	0.26405	0.0282292	2.30377	up
MSTRG.76701.1	MSTRG.76701.1	0.146049	0.7328	0.0148893	2.30423	up
MSTRG.123164.2	MSTRG.123164.2	0.194288	1.01453	0.0151202	2.30671	up
MSTRG.11841.1	MSTRG.11841.1	0.246849	1.38984	0.028984	2.30722	up
MSTRG.69411.1	MSTRG.69411.1	0.062859	0.317632	0.0340885	2.31177	up
MSTRG.201450.1	MSTRG.201450.1	0.091067	0.491902	0.0360131	2.31807	up
MSTRG.173085.2	MSTRG.173085.2	0.053983	0.337096	0.0360131	2.31807	up
ENST00000592245	AC007204.2-001	0.050928	0.302875	0.0360131	2.31807	up
MSTRG.125978.1	MSTRG.125978.1	0.189855	0.987966	0.0111693	2.34202	up
ENST00000499418	RNF139-AS1-001	0.073907	0.38105	0.0102155	2.3444	up
ENST00000567068	RP11-244O19.1-001	0.028736	0.148164	0.0195794	2.35323	up
MSTRG.191631.1	MSTRG.191631.1	0.088988	0.481287	0.0174685	2.36715	up
MSTRG.125431.1	MSTRG.125431.1	0.100168	0.54622	0.0129278	2.37196	up
MSTRG.116796.2	MSTRG.116796.2	0.614759	3.28325	0.00922779	2.37398	up
MSTRG.62511.1	MSTRG.62511.1	0.063779	0.385773	0.030963	2.38484	up
MSTRG.153216.1	MSTRG.153216.1	0.110079	0.59191	0.030963	2.38484	up
MSTRG.105190.1	MSTRG.105190.1	0.129163	0.697045	0.00901602	2.3863	up
ENST00000569883	RP11-111K18.2-001	0.06502	0.352363	0.0192983	2.40052	up
ENST00000605571	RP11-572O17.1-001	0.651686	3.51702	0.00749301	2.40121	up
MSTRG.150321.2	MSTRG.150321.2	0.09555	0.544533	0.019103	2.41322	up
MSTRG.168943.1	MSTRG.168943.1	0.160719	0.870533	0.00690295	2.41537	up
MSTRG.2398.1	MSTRG.2398.1	0.078014	0.43968	0.0167306	2.41969	up
MSTRG.191655.1	MSTRG.191655.1	0.134553	0.843572	0.0231368	2.42232	up
MSTRG.98396.2	MSTRG.98396.2	0.076863	0.476823	0.0208084	2.42889	up
MSTRG.125279.1	MSTRG.125279.1	0.08906	0.536505	0.0208084	2.42889	up
ENST00000608605	RP11-804H8.6-001	0.04412	0.241809	0.0177819	2.43286	up
MSTRG.35.1	MSTRG.35.1	6.73846	37.0478	0.00585627	2.43898	up
MSTRG.95299.2	MSTRG.95299.2	0.264825	1.47815	0.0142318	2.44879	up
MSTRG.107818.1	MSTRG.107818.1	0.176412	0.996039	0.00981891	2.44883	up
MSTRG.101791.1	MSTRG.101791.1	0.201464	1.14651	0.0148245	2.46193	up
MSTRG.200065.1	MSTRG.200065.1	0.068806	0.418061	0.0148245	2.46193	up
ENST00000500215	RP11-7F17.5-001	0.028052	0.172445	0.0164008	2.46449	up
ENST00000570843	RP11-473M20.16-001	2.4574	13.8291	0.00528292	2.46769	up
MSTRG.7012.1	MSTRG.7012.1	0.096459	0.61096	0.0204297	2.47457	up
ENST00000561544	RP11-304L19.8-001	0.049326	0.361737	0.049219	2.48683	up
ENST00000503052	RP11-540O11.1-001	0.035106	0.228185	0.018524	2.49295	up
MSTRG.173085.3	MSTRG.173085.3	0.153966	0.94979	0.013992	2.49544	up
ENST00000530778	RNF139-AS1-003	0.811281	4.64937	0.00491776	2.49575	up
MSTRG.90433.1	MSTRG.90433.1	0.252418	1.46214	0.0122112	2.50441	up
ENST00000431679	GS1-259H13.2-001	0.096357	0.558111	0.0122112	2.50441	up
MSTRG.157995.1	MSTRG.157995.1	0.069032	0.421881	0.013426	2.50523	up
ENST00000455541	AC016700.2-001	0.21556	1.29535	0.013426	2.50523	up
MSTRG.156506.2	MSTRG.156506.2	0.056305	0.332667	0.0155408	2.50666	up
MSTRG.47728.1	MSTRG.47728.1	0.06287	0.374663	0.0155408	2.50666	up
MSTRG.83842.1	MSTRG.83842.1	0.086189	0.508247	0.00605073	2.50931	up
MSTRG.75863.2	MSTRG.75863.2	0.078378	0.569715	0.0231099	2.50975	up
MSTRG.183156.1	MSTRG.183156.1	0.039364	0.261246	0.0231099	2.50975	up
MSTRG.123171.1	MSTRG.123171.1	0.070874	0.430189	0.0231099	2.50975	up
ENST00000607296	CTD-2235C13.3-001	0.091263	0.54791	0.0231099	2.50975	up
ENST00000425554	RP11-399E6.1-001	0.061461	0.423717	0.0231099	2.50975	up
MSTRG.81733.1	MSTRG.81733.1	0.072662	0.423026	0.01808	2.525	up
ENST00000440088	APTR-001	0.12069	0.708299	0.00628285	2.52925	up
MSTRG.53706.7	MSTRG.53706.7	0.052689	0.312045	0.0124961	2.53265	up
ENST00000433510	RP11-357H14.17-001	0.224706	1.35553	0.00616633	2.54063	up
MSTRG.140740.2	MSTRG.140740.2	0.070511	0.437053	0.0141388	2.54402	up
MSTRG.116828.1	MSTRG.116828.1	0.144694	0.954269	0.0141388	2.54402	up
ENST00000580960	RP11-60A24.3-002	0.134044	0.848352	0.0141388	2.54402	up
MSTRG.177021.2	MSTRG.177021.2	0.058401	0.352138	0.00533235	2.54932	up
ENST00000415386	RP5-875O13.1-001	0.459718	2.76763	0.0045479	2.55806	up
MSTRG.191705.1	MSTRG.191705.1	0.089689	0.565333	0.0420281	2.56041	up
MSTRG.43366.1	MSTRG.43366.1	0.049167	0.365922	0.0420281	2.56041	up
MSTRG.29142.1	MSTRG.29142.1	0.055317	0.397683	0.0200574	2.56838	up
MSTRG.123279.1	MSTRG.123279.1	0.037938	0.275443	0.0200574	2.56838	up
ENST00000619442	PTGER4P2-CDK2AP2P2-001	0.013238	0.086628	0.0200574	2.56838	up
ENST00000561652	RP11-690D19.3-001	0.060194	0.364758	0.00552248	2.57037	up
MSTRG.118137.1	MSTRG.118137.1	0.057813	0.384973	0.0160355	2.57372	up
MSTRG.80064.1	MSTRG.80064.1	0.098709	0.657612	0.0128803	2.58045	up
MSTRG.102666.5	MSTRG.102666.5	0.064424	0.395608	0.0123878	2.5827	up
MSTRG.55735.2	MSTRG.55735.2	0.093047	0.616059	0.0123878	2.5827	up
MSTRG.151687.1	MSTRG.151687.1	0.098757	0.632874	0.0111014	2.5845	up
MSTRG.118918.1	MSTRG.118918.1	0.233722	1.43772	0.00996914	2.58721	up
ENST00000590622	LINC00665-006	0.138721	0.866847	0.00490674	2.60542	up
MSTRG.11689.5	MSTRG.11689.5	0.095768	0.601799	0.00926607	2.61025	up
MSTRG.77309.22	MSTRG.77309.22	0.168243	1.04316	0.00435214	2.61086	up
MSTRG.198069.1	MSTRG.198069.1	2.71108	17.022	0.00385295	2.61211	up
MSTRG.188382.1	MSTRG.188382.1	0.078478	0.495957	0.011397	2.61433	up
MSTRG.84088.2	MSTRG.84088.2	0.092948	0.612857	0.011397	2.61433	up
MSTRG.161514.1	MSTRG.161514.1	0.036751	0.258412	0.0117489	2.61597	up
MSTRG.91352.1	MSTRG.91352.1	0.060269	0.405526	0.0142523	2.62085	up
MSTRG.29189.1	MSTRG.29189.1	0.049938	0.352699	0.017459	2.62471	up
MSTRG.145397.1	MSTRG.145397.1	0.105554	0.776444	0.017459	2.62471	up
MSTRG.125860.3	MSTRG.125860.3	0.082083	0.539876	0.017459	2.62471	up
MSTRG.26404.1	MSTRG.26404.1	0.270097	1.74118	0.00547395	2.62848	up
MSTRG.156190.9	MSTRG.156190.9	0.028949	0.231631	0.0360131	2.63041	up
ENST00000612517	RP11-676J12.9-001	0.213268	1.39587	0.00877869	2.63443	up
MSTRG.105582.1	MSTRG.105582.1	0.058044	0.419172	0.0107303	2.65064	up
MSTRG.3816.1	MSTRG.3816.1	0.058868	0.388069	0.0107303	2.65064	up
MSTRG.95906.4	MSTRG.95906.4	0.576798	3.81554	0.00513622	2.65507	up
ENST00000564237	RP11-196G18.22-001	1.21096	7.74313	0.0027196	2.65738	up
MSTRG.156068.1	MSTRG.156068.1	0.090945	0.6045	0.0126934	2.66649	up
MSTRG.69774.2	MSTRG.69774.2	0.12277	0.80894	0.00887687	2.66838	up
ENST00000624071	LINC01006-201	0.326214	2.17856	0.0047328	2.67575	up
MSTRG.127438.2	MSTRG.127438.2	0.06674	0.470565	0.0133396	2.67893	up
MSTRG.159329.1	MSTRG.159329.1	0.037389	0.309668	0.0133396	2.67893	up
MSTRG.82220.1	MSTRG.82220.1	0.241152	1.81148	0.00981205	2.6845	up
ENST00000606034	RP11-54O7.17-001	0.205499	1.36965	0.00309528	2.69052	up
MSTRG.142183.1	MSTRG.142183.1	0.049943	0.38625	0.030963	2.69717	up
MSTRG.68742.1	MSTRG.68742.1	0.052329	0.416626	0.030963	2.69717	up
ENST00000414046	HCP5-001	0.012422	0.092246	0.030963	2.69717	up
MSTRG.189825.1	MSTRG.189825.1	0.064087	0.477506	0.0113275	2.71073	up
MSTRG.28967.1	MSTRG.28967.1	0.05245	0.421395	0.0113275	2.71073	up
MSTRG.1795.4	MSTRG.1795.4	0.112225	0.74752	0.0035492	2.71164	up
MSTRG.196460.1	MSTRG.196460.1	0.03824	0.310692	0.0385026	2.72656	up
MSTRG.109966.1	MSTRG.109966.1	0.035119	0.293697	0.0385026	2.72656	up
ENST00000557147	LINC01578-008	0.500399	3.35729	0.00334638	2.72732	up
MSTRG.123194.1	MSTRG.123194.1	0.063981	0.454733	0.00762637	2.73434	up
ENST00000414075	GAS5-028	0.645931	4.49774	0.00310435	2.75017	up
MSTRG.77336.5	MSTRG.77336.5	0.032922	0.265977	0.0101281	2.75366	up
MSTRG.151757.2	MSTRG.151757.2	0.080572	0.62334	0.0267078	2.76098	up
ENST00000381106	RP11-706O15.5-002	0.031269	0.230829	0.0267078	2.76098	up
ENST00000473595	RP11-3P17.4-001	0.012787	0.088992	0.0267078	2.76098	up
ENST00000582695	RP11-110I1.12-002	0.062743	0.449361	0.0267078	2.76098	up
MSTRG.159560.1	MSTRG.159560.1	0.313084	2.20506	0.00283883	2.78148	up
MSTRG.127938.18	MSTRG.127938.18	0.095246	0.669237	0.00594972	2.78152	up
MSTRG.12059.1	MSTRG.12059.1	0.041482	0.369399	0.0102998	2.78161	up
MSTRG.141835.1	MSTRG.141835.1	0.068288	0.539546	0.0102998	2.78161	up
MSTRG.205627.1	MSTRG.205627.1	0.096609	0.809871	0.0102998	2.78161	up
ENST00000569543	CTC-297N7.1-001	0.080918	0.586425	0.0102998	2.78161	up
MSTRG.77577.2	MSTRG.77577.2	0.066279	0.48933	0.00332985	2.79746	up
MSTRG.89780.7	MSTRG.89780.7	0.285185	2.06091	0.00260747	2.80477	up
MSTRG.82414.1	MSTRG.82414.1	0.016719	0.176154	0.0322415	2.8085	up
MSTRG.54135.1	MSTRG.54135.1	0.065905	0.493825	0.0322415	2.8085	up
MSTRG.16784.1	MSTRG.16784.1	0.032657	0.357643	0.0322415	2.8085	up
MSTRG.11710.1	MSTRG.11710.1	0.051233	0.437152	0.0231099	2.82209	up
ENST00000618199	RP11-227G15.11-001	0.073625	0.553746	0.0090842	2.83033	up
MSTRG.92141.1	MSTRG.92141.1	0.085976	0.633233	0.00814195	2.83586	up
MSTRG.164587.1	MSTRG.164587.1	0.123298	0.900129	0.00315219	2.83822	up
ENST00000453722	LINC00511-002	0.035341	0.267145	0.00679059	2.83982	up
MSTRG.92135.1	MSTRG.92135.1	0.092775	0.680508	0.00291375	2.85393	up
MSTRG.15058.1	MSTRG.15058.1	0.167757	1.24738	0.00270204	2.85683	up
MSTRG.13224.4	MSTRG.13224.4	0.381792	2.91573	0.00261951	2.86722	up
ENST00000622010	RP11-162A12.4-001	0.078222	0.703034	0.00659149	2.87526	up
MSTRG.29713.1	MSTRG.29713.1	0.0318	0.293463	0.00803097	2.87746	up
MSTRG.165382.3	MSTRG.165382.3	0.053562	0.424494	0.00803097	2.87746	up
ENST00000623794	bP-2189O9.3-001	0.035939	0.319303	0.0200574	2.88071	up
MSTRG.174040.1	MSTRG.174040.1	0.024815	0.28149	0.0271201	2.88603	up
MSTRG.167532.1	MSTRG.167532.1	0.347334	2.62944	0.00192266	2.90013	up
MSTRG.46396.1	MSTRG.46396.1	0.04461	0.358227	0.00565177	2.90676	up
ENST00000608984	RP11-74E22.6-001	0.20591	1.59677	0.00565177	2.90676	up
MSTRG.213886.1	MSTRG.213886.1	0.157643	1.21989	0.00232462	2.92647	up
MSTRG.172483.1	MSTRG.172483.1	0.050151	0.432524	0.017459	2.93705	up
MSTRG.128459.2	MSTRG.128459.2	0.080198	0.768867	0.0229108	2.9596	up
MSTRG.111758.1	MSTRG.111758.1	0.026516	0.314724	0.0229108	2.9596	up
ENST00000608028	RP11-383I23.2-001	0.005414	0.06623	0.0229108	2.9596	up
MSTRG.146612.1	MSTRG.146612.1	0.059996	0.504485	0.00472768	2.97073	up
MSTRG.258.4	MSTRG.258.4	0.18219	1.554	0.0032374	2.97385	up
MSTRG.197464.2	MSTRG.197464.2	0.071802	0.624042	0.00486085	2.98741	up
ENST00000602984	MIR137HG-003	0.036557	0.307964	0.0133396	2.99126	up
MSTRG.211570.3	MSTRG.211570.3	0.052583	0.462817	0.00305549	2.99372	up
MSTRG.80119.1	MSTRG.80119.1	0.111047	0.908227	0.00165715	2.99452	up
MSTRG.160922.1	MSTRG.160922.1	0.061798	0.525516	0.0027745	3.00157	up
MSTRG.46384.1	MSTRG.46384.1	0.064369	0.56821	0.00397364	3.00168	up
MSTRG.125860.1	MSTRG.125860.1	0.064199	0.547628	0.00397364	3.00168	up
MSTRG.89667.1	MSTRG.89667.1	0.0395	0.38643	0.0417569	3.00228	up
MSTRG.86681.1	MSTRG.86681.1	0.039154	0.416151	0.0417569	3.00228	up
MSTRG.86658.1	MSTRG.86658.1	0.062328	0.547217	0.0417569	3.00228	up
MSTRG.90708.1	MSTRG.90708.1	0.032767	0.491448	0.0417569	3.00228	up
ENST00000433116	RP11-637A17.2-003	0.029592	0.270981	0.0417569	3.00228	up
MSTRG.119973.2	MSTRG.119973.2	0.113292	0.943045	0.00134411	3.0065	up
MSTRG.22615.2	MSTRG.22615.2	0.144811	1.20378	0.000923953	3.0327	up
ENST00000618151	RP11-34F20.7-001	0.048886	0.426722	0.00167004	3.03297	up
MSTRG.2244.1	MSTRG.2244.1	0.338705	2.86286	0.000958655	3.04278	up
MSTRG.56640.1	MSTRG.56640.1	0.039109	0.336265	0.0117068	3.04352	up
MSTRG.124733.1	MSTRG.124733.1	0.05224	0.545153	0.00501501	3.05195	up
ENST00000442037	H19-015	0.958747	8.31462	0.000750198	3.08183	up
MSTRG.117956.2	MSTRG.117956.2	0.155354	1.38277	0.00218246	3.08915	up
MSTRG.203742.1	MSTRG.203742.1	0.104488	1.03973	0.00308794	3.09074	up
MSTRG.42540.1	MSTRG.42540.1	0.097643	0.85631	0.00363393	3.09146	up
MSTRG.115424.1	MSTRG.115424.1	0.045217	0.400789	0.0044811	3.09246	up
MSTRG.107483.1	MSTRG.107483.1	0.062404	0.613305	0.00518687	3.09394	up
ENST00000596379	CTD-2619J13.13-001	0.076352	0.698496	0.00518687	3.09394	up
MSTRG.202781.1	MSTRG.202781.1	0.019559	0.253703	0.0165518	3.09637	up
MSTRG.130017.1	MSTRG.130017.1	0.040576	0.397932	0.0165518	3.09637	up
MSTRG.97224.1	MSTRG.97224.1	0.024874	0.30388	0.0165518	3.09637	up
MSTRG.36035.25	MSTRG.36035.25	0.060141	0.736683	0.0336648	3.10105	up
MSTRG.144039.1	MSTRG.144039.1	0.019498	0.307297	0.0336648	3.10105	up
MSTRG.186788.1	MSTRG.186788.1	0.0636	0.547217	0.0336648	3.10105	up
MSTRG.165611.1	MSTRG.165611.1	0.054324	0.509601	0.0336648	3.10105	up
MSTRG.31677.1	MSTRG.31677.1	0.030785	0.508194	0.0336648	3.10105	up
MSTRG.75075.3	MSTRG.75075.3	0.112429	0.989579	0.0019184	3.1043	up
MSTRG.198381.1	MSTRG.198381.1	0.083615	0.774887	0.0020368	3.10577	up
MSTRG.81923.2	MSTRG.81923.2	0.252663	2.40416	0.0020368	3.10577	up
MSTRG.176447.2	MSTRG.176447.2	0.0885	0.828118	0.00206688	3.1075	up
MSTRG.128458.8	MSTRG.128458.8	44.2932	391.356	0.000533949	3.12439	up
MSTRG.123197.1	MSTRG.123197.1	0.049551	0.517441	0.00454775	3.14267	up
MSTRG.42000.3	MSTRG.42000.3	0.047187	0.467781	0.0019819	3.14904	up
ENST00000636531	RP4-614C10.2-001	0.022674	0.20573	0.0141499	3.16018	up
MSTRG.186362.1	MSTRG.186362.1	0.061032	0.595831	0.0273221	3.19349	up
MSTRG.147354.2	MSTRG.147354.2	0.021931	0.284183	0.0273221	3.19349	up
MSTRG.188815.4	MSTRG.188815.4	0.03815	0.43224	0.0273221	3.19349	up
ENST00000592070	LINC00629-002	0.012746	0.201684	0.0273221	3.19349	up
ENST00000437721	LINC00384-001	0.002655	0.038412	0.0121407	3.22128	up
ENST00000426282	NUP50-AS1-001	0.063347	0.62803	0.00083816	3.2307	up
MSTRG.97713.1	MSTRG.97713.1	0.090739	0.906794	0.000838802	3.23374	up
ENST00000512693	CTD-2587M2.1-001	0.019904	0.191088	0.00131517	3.23393	up
MSTRG.163736.2	MSTRG.163736.2	0.085642	1.0067	0.0035234	3.23544	up
MSTRG.153709.6	MSTRG.153709.6	0.061166	0.611553	0.0035234	3.23544	up
MSTRG.43036.1	MSTRG.43036.1	0.097723	0.984863	0.0035234	3.23544	up
ENST00000574741	RP11-156P1.3-001	0.03897	0.427018	0.0035234	3.23544	up
MSTRG.96952.2	MSTRG.96952.2	0.071292	0.717586	0.00156584	3.23927	up
MSTRG.3503.1	MSTRG.3503.1	0.12795	1.22709	0.000528732	3.2394	up
ENST00000611296	RP3-324O17.8-001	0.13563	1.35981	0.00262415	3.24401	up
MSTRG.145649.7	MSTRG.145649.7	0.273743	2.70444	0.000591777	3.24416	up
MSTRG.63528.1	MSTRG.63528.1	0.038566	0.38064	0.00236997	3.27954	up
ENST00000483588	LRRC75A-AS1-006	0.062548	0.664904	0.00236997	3.27954	up
MSTRG.189258.2	MSTRG.189258.2	0.074898	0.900124	0.00311281	3.27968	up
MSTRG.65058.1	MSTRG.65058.1	0.04106	0.624973	0.0104531	3.27991	up
MSTRG.120363.1	MSTRG.120363.1	0.033315	0.424513	0.0104531	3.27991	up
MSTRG.195660.1	MSTRG.195660.1	0.025169	0.441513	0.0183347	3.28035	up
MSTRG.127453.3	MSTRG.127453.3	0.015704	0.203633	0.0183347	3.28035	up
ENST00000620848	RP5-1116H23.4-001	0.059835	0.591548	0.0183347	3.28035	up
MSTRG.9304.1	MSTRG.9304.1	0.03498	0.360454	0.00214384	3.31421	up
MSTRG.211570.4	MSTRG.211570.4	0.015348	0.17754	0.00275653	3.3226	up
ENST00000546580	RP11-620J15.3-001	0.601839	6.16842	0.000372783	3.33013	up
MSTRG.156978.2	MSTRG.156978.2	0.048784	0.554787	0.00903024	3.33624	up
MSTRG.164540.1	MSTRG.164540.1	0.031143	0.430712	0.00903024	3.33624	up
MSTRG.20626.1	MSTRG.20626.1	0.355099	3.67036	0.000273097	3.34793	up
ENST00000629651	LINC00950-001	0.005365	0.069413	0.00194228	3.34807	up
MSTRG.166972.1	MSTRG.166972.1	1.08726	11.4418	0.000388906	3.35735	up
MSTRG.40674.1	MSTRG.40674.1	0.02535	0.334316	0.0151503	3.36229	up
MSTRG.126695.1	MSTRG.126695.1	0.020327	0.302586	0.0151503	3.36229	up
MSTRG.74264.1	MSTRG.74264.1	0.04193	0.748316	0.0151503	3.36229	up
MSTRG.256.16	MSTRG.256.16	0.046655	0.533153	0.00244656	3.36429	up
MSTRG.175334.1	MSTRG.175334.1	0.053421	0.569003	0.00244656	3.36429	up
MSTRG.62344.7	MSTRG.62344.7	0.144144	1.55584	0.00105111	3.38606	up
ENST00000447298	H19-014	0.129009	1.47721	0.00105111	3.38606	up
ENST00000452197	GAS5-013	0.457255	5.02158	0.000425097	3.38951	up
MSTRG.116963.1	MSTRG.116963.1	0.079002	0.890694	0.000693575	3.38962	up
MSTRG.86671.1	MSTRG.86671.1	0.041984	0.642441	0.00680349	3.39046	up
MSTRG.207736.1	MSTRG.207736.1	0.074005	0.945795	0.00680349	3.39046	up
ENST00000622854	KB-68A7.2-001	0.040641	0.46469	0.00680349	3.39046	up
MSTRG.186414.1	MSTRG.186414.1	0.038831	0.487249	0.0013824	3.3924	up
MSTRG.49722.1	MSTRG.49722.1	0.041287	0.48106	0.0021762	3.4048	up
MSTRG.206862.9	MSTRG.206862.9	0.040293	0.590933	0.0125866	3.43982	up
MSTRG.154319.1	MSTRG.154319.1	0.036725	0.559106	0.0125866	3.43982	up
MSTRG.189927.1	MSTRG.189927.1	0.041479	0.896195	0.0125866	3.43982	up
MSTRG.120137.1	MSTRG.120137.1	0.059371	0.666951	0.000272821	3.45852	up
MSTRG.81918.1	MSTRG.81918.1	0.70244	8.10387	0.00034006	3.46243	up
MSTRG.65493.16	MSTRG.65493.16	0.04192	0.5192	0.000647893	3.4783	up
MSTRG.66416.1	MSTRG.66416.1	0.03875	0.509099	0.00518687	3.49314	up
MSTRG.168598.1	MSTRG.168598.1	0.030257	0.39461	0.0105104	3.51339	up
MSTRG.16831.1	MSTRG.16831.1	0.031445	0.504689	0.0105104	3.51339	up
MSTRG.20768.1	MSTRG.20768.1	0.00925	0.139366	0.0105104	3.51339	up
MSTRG.208089.1	MSTRG.208089.1	0.02189	0.344495	0.0105104	3.51339	up
MSTRG.29960.2	MSTRG.29960.2	0.050551	0.751039	0.00139033	3.51993	up
MSTRG.81911.8	MSTRG.81911.8	26.5861	313.582	0.000116029	3.5406	up
MSTRG.64954.1	MSTRG.64954.1	0.023021	0.282322	0.00454775	3.54186	up
MSTRG.24724.2	MSTRG.24724.2	0.03243	0.423394	0.00124894	3.55635	up
MSTRG.18781.3	MSTRG.18781.3	0.034506	0.560392	0.00124894	3.55635	up
MSTRG.119082.2	MSTRG.119082.2	0.25144	3.15753	0.000247392	3.57921	up
ENST00000615349	RP11-29B2.6-001	0.032466	0.417121	0.00881945	3.58339	up
ENST00000543321	RP11-377D9.3-001	0.004141	0.097567	0.00881945	3.58339	up
MSTRG.13227.1	MSTRG.13227.1	1.2575	15.6793	0.000148183	3.5855	up
MSTRG.71201.2	MSTRG.71201.2	0.054151	0.796022	0.00399788	3.58899	up
MSTRG.33779.1	MSTRG.33779.1	0.094462	1.47026	0.00112392	3.59188	up
ENST00000613749	RP11-734K23.9-001	0.017735	0.24441	0.000641766	3.61823	up
ENST00000614284	LINC01521-201	0.083093	1.12379	0.000717575	3.64901	up
ENST00000565617	KB-1460A1.5-001	0.070033	0.904122	0.000171148	3.65048	up
MSTRG.109043.2	MSTRG.109043.2	0.169341	2.20085	0.000255383	3.6681	up
MSTRG.186612.1	MSTRG.186612.1	0.019363	0.285438	0.000328484	3.68882	up
MSTRG.183522.1	MSTRG.183522.1	0.022146	0.318982	0.00629519	3.71397	up
MSTRG.186501.1	MSTRG.186501.1	0.027226	0.418834	0.00629519	3.71397	up
MSTRG.112940.1	MSTRG.112940.1	0.04638	0.83921	0.00275653	3.7218	up
MSTRG.93962.12	MSTRG.93962.12	0.027706	0.388181	0.000749483	3.72582	up
ENST00000453135	RP1-69M21.2-001	0.028311	0.390681	0.000749483	3.72582	up
MSTRG.49262.1	MSTRG.49262.1	0.024291	0.386821	0.000339277	3.74947	up
ENST00000591137	CTC-296K1.4-001	0.748661	10.3601	7.28e-05	3.75063	up
MSTRG.120579.8	MSTRG.120579.8	0.478454	6.61989	6.66e-05	3.75767	up
ENST00000602819	SNHG8-004	0.338397	4.82151	0.000120052	3.76423	up
MSTRG.93810.1	MSTRG.93810.1	0.044581	0.821202	0.00535262	3.77507	up
MSTRG.47081.1	MSTRG.47081.1	0.015608	0.363856	0.00535262	3.77507	up
MSTRG.20360.1	MSTRG.20360.1	0.022796	0.639605	0.00535262	3.77507	up
MSTRG.62894.1	MSTRG.62894.1	0.017253	0.285404	0.00535262	3.77507	up
ENST00000416191	RP11-441O15.3-001	0.003692	0.085997	0.00535262	3.77507	up
ENST00000590523	LINC00662-002	0.112647	1.61987	7.99e-05	3.79065	up
MSTRG.33575.1	MSTRG.33575.1	0.032213	0.493429	0.000345488	3.79302	up
MSTRG.131583.2	MSTRG.131583.2	0.079764	1.16563	0.000409502	3.80342	up
MSTRG.13690.1	MSTRG.13690.1	0.000124	0.199745	0.0207172	3.80658	up
MSTRG.70998.1	MSTRG.70998.1	0.019797	0.377516	0.0207172	3.80658	up
MSTRG.42000.4	MSTRG.42000.4	0.005395	0.242115	0.0207172	3.80658	up
MSTRG.96763.1	MSTRG.96763.1	0.013938	0.463375	0.0207172	3.80658	up
MSTRG.200226.1	MSTRG.200226.1	0.018961	0.329742	0.0207172	3.80658	up
ENST00000555975	CTD-3035D6.2-001	0.021046	0.369919	0.0207172	3.80658	up
ENST00000569932	RP11-255C15.3-001	0.058077	0.831157	0.000195573	3.80915	up
ENST00000602813	RNU11-001	22.4849	320.141	4.37e-05	3.81198	up
MSTRG.44346.1	MSTRG.44346.1	0.028972	0.513721	0.000351919	3.85142	up
ENST00000616901	AC139100.4-001	0.186385	2.84267	0.000127642	3.85939	up
MSTRG.10128.3	MSTRG.10128.3	0.182655	2.73204	5.82e-05	3.87481	up
MSTRG.83802.1	MSTRG.83802.1	0.025888	0.39989	0.000426839	3.87747	up
ENST00000602598	RP11-770J1.7-001	0.033376	0.762487	0.00155059	3.88176	up
MSTRG.31975.5	MSTRG.31975.5	0.033501	0.553522	0.00391564	3.89003	up
MSTRG.116777.2	MSTRG.116777.2	0.028965	0.796183	0.00391564	3.89003	up
ENST00000626089	LINC00969-062	0.022	0.363655	0.00391564	3.89003	up
MSTRG.46413.1	MSTRG.46413.1	0.009435	0.292415	0.0162256	3.91261	up
ENST00000520913	PVT1-013	0.001832	0.250117	0.0162256	3.91261	up
MSTRG.145439.4	MSTRG.145439.4	0.017952	0.329463	0.000357582	3.93392	up
MSTRG.210187.1	MSTRG.210187.1	0.017467	0.427224	0.00290643	3.94425	up
MSTRG.71045.1	MSTRG.71045.1	0.039426	0.835202	0.00290643	3.94425	up
MSTRG.105225.1	MSTRG.105225.1	0.015815	0.282941	0.00290643	3.94425	up
ENST00000534499	RAB30-AS1-006	0.024909	0.488758	0.00290643	3.94425	up
MSTRG.80021.3	MSTRG.80021.3	0.040987	0.794188	0.00124894	3.95554	up
MSTRG.81915.1	MSTRG.81915.1	0.065659	1.08465	0.000327888	3.96135	up
MSTRG.156052.1	MSTRG.156052.1	0.021116	0.340565	0.000327888	3.96135	up
MSTRG.120579.17	MSTRG.120579.17	1.21552	19.6438	3.55e-05	3.96236	up
MSTRG.1567.10	MSTRG.1567.10	0.023735	0.388702	0.000212712	3.98654	up
MSTRG.62893.1	MSTRG.62893.1	0.042171	0.738055	0.000301013	3.98826	up
MSTRG.3418.2	MSTRG.3418.2	0.031131	0.526248	0.00112392	3.99107	up
MSTRG.139322.1	MSTRG.139322.1	0.014955	0.285454	0.00251672	3.9965	up
MSTRG.114258.6	MSTRG.114258.6	0.002685	0.37959	0.0128214	4.01138	up
MSTRG.170156.4	MSTRG.170156.4	0.009769	0.320937	0.0128214	4.01138	up
MSTRG.198586.9	MSTRG.198586.9	2.7e-05	0.33503	0.0128214	4.01138	up
MSTRG.155985.1	MSTRG.155985.1	0.013982	0.313032	0.0128214	4.01138	up
MSTRG.13224.3	MSTRG.13224.3	0.319842	5.51948	4.73e-05	4.01165	up
ENST00000601795	RP4-806M20.3-001	0.031131	0.528848	0.000276657	4.01467	up
MSTRG.130134.1	MSTRG.130134.1	0.114536	2.11334	0.000254555	4.04062	up
MSTRG.100073.4	MSTRG.100073.4	0.030285	0.651899	0.00218621	4.04693	up
ENST00000622921	LINC01128-014	0.020776	0.435427	0.00218621	4.04693	up
MSTRG.34475.1	MSTRG.34475.1	0.028397	0.520531	0.000914836	4.0596	up
ENST00000612444	RP11-358N2.2-001	0.053342	0.924687	0.000216204	4.0661	up
MSTRG.194519.1	MSTRG.194519.1	0.015886	0.421434	0.000827393	4.09268	up
MSTRG.85862.1	MSTRG.85862.1	0.024008	0.473823	0.0019049	4.09565	up
MSTRG.106519.1	MSTRG.106519.1	0.016181	0.530225	0.0019049	4.09565	up
MSTRG.18936.1	MSTRG.18936.1	0.00219	0.406504	0.010216	4.10381	up
MSTRG.13228.1	MSTRG.13228.1	0.00896	0.440469	0.010216	4.10381	up
MSTRG.199354.1	MSTRG.199354.1	0.016959	0.314416	0.00166464	4.14278	up
MSTRG.96333.1	MSTRG.96333.1	0.459744	8.61199	4.36e-05	4.16414	up
MSTRG.200102.2	MSTRG.200102.2	0.052004	0.952171	1.9e-05	4.16492	up
ENST00000562917	RP11-1C8.5-001	0.009773	0.183907	0.000117521	4.16809	up
MSTRG.96718.1	MSTRG.96718.1	0.014448	0.283955	0.00145876	4.18842	up
ENST00000562493	CTC-459F4.1-001	0.004234	0.095462	0.00145876	4.18842	up
MSTRG.177536.6	MSTRG.177536.6	0.017361	0.412235	0.00663559	4.19068	up
MSTRG.107365.1	MSTRG.107365.1	0.016657	0.34765	0.00663559	4.19068	up
ENST00000577806	LINC00909-004	0.12115	2.33813	3.75e-05	4.20083	up
MSTRG.97071.1	MSTRG.97071.1	0.087517	1.74384	6.33e-05	4.21331	up
MSTRG.168262.8	MSTRG.168262.8	0.241434	4.71742	1.93e-05	4.2309	up
MSTRG.101376.5	MSTRG.101376.5	0.024924	0.641789	0.0012818	4.23266	up
MSTRG.14279.1	MSTRG.14279.1	0.019454	0.578192	0.000467231	4.24758	up
MSTRG.32737.2	MSTRG.32737.2	0.019289	0.573629	0.000467231	4.24758	up
MSTRG.120524.1	MSTRG.120524.1	0.01392	0.289333	0.00112921	4.27558	up
MSTRG.125978.2	MSTRG.125978.2	0.010905	0.244047	0.00112921	4.27558	up
MSTRG.77050.1	MSTRG.77050.1	0.054882	1.20396	4.66e-05	4.30301	up
MSTRG.113129.1	MSTRG.113129.1	0.035102	1.02061	0.000390437	4.30517	up
MSTRG.162167.1	MSTRG.162167.1	0.024874	0.763669	0.000997265	4.31727	up
MSTRG.140053.1	MSTRG.140053.1	0.002636	0.411806	0.00442948	4.35014	up
MSTRG.82407.1	MSTRG.82407.1	0.081367	1.73382	1.97e-05	4.37147	up
ENST00000531523	SNHG9-001	1.43766	30.5909	7.34e-06	4.37176	up
MSTRG.175858.1	MSTRG.175858.1	0.034107	0.877539	5.15e-05	4.3793	up
MSTRG.209936.3	MSTRG.209936.3	0.026329	0.667998	7.15e-05	4.38239	up
MSTRG.81911.1	MSTRG.81911.1	3.19783	68.0013	4.67e-06	4.38795	up
MSTRG.15648.5	MSTRG.15648.5	0.037351	0.836645	0.000696625	4.39719	up
ENST00000328376	C3orf35-002	0.00503	0.221053	0.000696625	4.39719	up
MSTRG.127438.1	MSTRG.127438.1	0.021575	0.697752	0.000276657	4.41387	up
MSTRG.66808.1	MSTRG.66808.1	0.022756	0.513378	6.26e-05	4.42241	up
MSTRG.13274.1	MSTRG.13274.1	0.007845	0.217446	0.00365261	4.42372	up
MSTRG.1795.3	MSTRG.1795.3	0.033206	0.905266	5.86e-05	4.44201	up
MSTRG.164338.1	MSTRG.164338.1	0.015656	0.369678	0.000554409	4.47291	up
MSTRG.41569.1	MSTRG.41569.1	0.016461	0.384499	0.000554409	4.47291	up
MSTRG.152630.1	MSTRG.152630.1	0.009274	0.225014	0.000554409	4.47291	up
MSTRG.166737.2	MSTRG.166737.2	0.013446	0.507356	0.00302917	4.49372	up
MSTRG.116778.2	MSTRG.116778.2	0.023272	0.923834	0.000496089	4.50933	up
ENST00000445000	LINC01011-004	0.004853	0.158225	0.000496089	4.50933	up
MSTRG.135438.1	MSTRG.135438.1	0.019771	0.628284	4.26e-05	4.51784	up
ENST00000606907	RP11-791G15.2-001	0.126192	3.3808	2.08e-05	4.5576	up
MSTRG.81911.11	MSTRG.81911.11	0.553037	13.3263	3.5e-06	4.55769	up
ENST00000634547	RP11-157J13.1-001	0.014448	0.364874	0.000399481	4.57953	up
MSTRG.209329.1	MSTRG.209329.1	0.373221	9.36599	2.54e-06	4.61145	up
MSTRG.16450.1	MSTRG.16450.1	0.019538	0.50591	0.000359459	4.61339	up
MSTRG.59321.1	MSTRG.59321.1	0.015209	0.39743	0.000359459	4.61339	up
MSTRG.51454.1	MSTRG.51454.1	0.081068	2.07208	1.41e-05	4.61468	up
ENST00000589508	CTC-559E9.1-006	0.003489	0.592851	0.00211657	4.62429	up
MSTRG.204343.1	MSTRG.204343.1	0.019262	0.499556	1.44e-05	4.65138	up
MSTRG.12280.1	MSTRG.12280.1	0.038214	1.01299	0.000117022	4.65442	up
ENST00000493536	SNHG16-002	0.140867	3.71255	2.1e-06	4.68067	up
MSTRG.146083.1	MSTRG.146083.1	0.015619	0.415786	1.28e-05	4.68503	up
MSTRG.145439.5	MSTRG.145439.5	0.010251	0.481766	0.00178229	4.6854	up
ENST00000625204	FAM223A-001	0.012756	0.708883	0.000264573	4.71044	up
ENST00000605056	RP11-373D23.3-001	0.070177	1.91382	1.14e-05	4.71792	up
MSTRG.152939.1	MSTRG.152939.1	0.030407	0.838754	1.42e-05	4.72683	up
MSTRG.162936.2	MSTRG.162936.2	0.027585	1.30411	0.000197524	4.77169	up
MSTRG.12558.1	MSTRG.12558.1	0.025815	0.791686	0.000179717	4.80137	up
ENST00000414339	RP5-994D16.3-001	0.030266	0.923077	0.000163744	4.83045	up
MSTRG.77671.1	MSTRG.77671.1	0.022981	0.682611	1.3e-05	4.83195	up
ENST00000520348	SNHG6-005	0.556936	16.3474	1.11e-06	4.84101	up
MSTRG.91902.3	MSTRG.91902.3	0.010074	0.454727	0.000935753	4.85457	up
MSTRG.151688.1	MSTRG.151688.1	0.031689	1.03323	0.000935753	4.85457	up
MSTRG.193437.8	MSTRG.193437.8	0.00102	0.453013	0.000935753	4.85457	up
MSTRG.67161.2	MSTRG.67161.2	0.020317	0.79304	0.000935753	4.85457	up
MSTRG.146217.1	MSTRG.146217.1	0.018142	1.11099	0.000149393	4.85895	up
MSTRG.86710.13	MSTRG.86710.13	0.011637	0.408579	0.000149393	4.85895	up
MSTRG.30143.2	MSTRG.30143.2	0.019561	1.08928	0.00013648	4.88691	up
ENST00000513868	PVT1-004	0.071103	2.27908	2.33e-06	4.89681	up
ENST00000623789	RP3-412A9.17-001	9e-05	0.018406	0.000804374	4.90683	up
MSTRG.67317.1	MSTRG.67317.1	0.011199	0.418206	0.000124843	4.91433	up
MSTRG.115928.1	MSTRG.115928.1	0.015667	0.645177	0.000114341	4.94124	up
MSTRG.138441.1	MSTRG.138441.1	0.010798	0.347712	8.72e-06	4.94615	up
MSTRG.158711.3	MSTRG.158711.3	6.1e-05	0.37115	0.0006939	4.95725	up
ENST00000619415	RP11-334C17.6-001	0.033089	1.86938	0.0006939	4.95725	up
MSTRG.167199.1	MSTRG.167199.1	2.3969	77.2509	4.76e-07	4.98854	up
MSTRG.95906.9	MSTRG.95906.9	0.275425	9.3458	2.12e-06	4.99328	up
MSTRG.13223.2	MSTRG.13223.2	0.17538	6.11918	1.96e-06	5.01481	up
ENST00000616499	RP11-699C17.1-001	0.022773	1.49384	8.14e-05	5.01908	up
MSTRG.78440.5	MSTRG.78440.5	0.03577	1.22803	1.88e-06	5.02545	up
ENST00000518528	PVT1-009	0.009489	0.542931	0.000521585	5.05311	up
MSTRG.81911.4	MSTRG.81911.4	0.710076	24.4511	3.74e-07	5.08124	up
ENST00000617916	LLNLR-268E12.1-001	0.059075	2.2276	4.58e-06	5.10211	up
MSTRG.129727.1	MSTRG.129727.1	0.020009	0.782106	5.05e-05	5.1632	up
MSTRG.138445.1	MSTRG.138445.1	0.024587	0.914465	4.3e-07	5.17751	up
MSTRG.197086.2	MSTRG.197086.2	0.000593	0.253012	0.000347793	5.18591	up
ENST00000618230	RP11-158H5.8-001	0.0045	0.357546	4.34e-05	5.20821	up
MSTRG.26226.3	MSTRG.26226.3	0.010128	0.593184	1.44e-05	5.21621	up
MSTRG.2560.1	MSTRG.2560.1	0.011549	0.467785	4.03e-05	5.2302	up
MSTRG.77411.1	MSTRG.77411.1	0.020024	0.970662	1.88e-06	5.24096	up
MSTRG.90126.1	MSTRG.90126.1	0.001174	0.314323	0.000269148	5.26811	up
MSTRG.120580.2	MSTRG.120580.2	0.38317	15.3448	2.8e-07	5.28031	up
MSTRG.83312.2	MSTRG.83312.2	0.018999	0.96946	0.000210393	5.30751	up
MSTRG.40157.1	MSTRG.40157.1	0.021139	0.962896	2.81e-05	5.31495	up
MSTRG.123290.1	MSTRG.123290.1	0.020553	0.900477	2.45e-05	5.35552	up
ENST00000409569	MIR4435-2HG-001	0.134908	6.06117	5.73e-07	5.37916	up
MSTRG.95030.1	MSTRG.95030.1	0.010784	0.588458	0.000166	5.38324	up
MSTRG.43368.1	MSTRG.43368.1	0.011465	0.727813	0.000166	5.38324	up
MSTRG.71858.1	MSTRG.71858.1	0.009708	0.469287	2.14e-05	5.39499	up
MSTRG.97766.1	MSTRG.97766.1	0.069105	3.27846	4.18e-07	5.45468	up
ENST00000530270	RAB30-AS1-008	0.00125	0.415833	0.000118214	5.48986	up
MSTRG.95906.11	MSTRG.95906.11	0.236062	12.3552	2.92e-07	5.50977	up
MSTRG.114924.5	MSTRG.114924.5	0.000408	0.409937	9.52e-05	5.55679	up
ENST00000593346	FAM223B-201	0.012846	0.711205	7.72e-05	5.62076	up
MSTRG.6199.5	MSTRG.6199.5	0.015382	0.809678	2.77e-06	5.63082	up
MSTRG.207450.1	MSTRG.207450.1	0.011914	0.781127	7.98e-06	5.64462	up
MSTRG.141264.2	MSTRG.141264.2	0.017868	1.17638	2.1e-06	5.70757	up
MSTRG.96336.1	MSTRG.96336.1	7.81761	421.976	1.88e-08	5.73024	up
MSTRG.8996.3	MSTRG.8996.3	0.004549	0.634434	3.9e-05	5.79723	up
MSTRG.197243.1	MSTRG.197243.1	0.122085	7.11512	3.36e-08	5.81038	up
MSTRG.9290.3	MSTRG.9290.3	1.5e-05	0.310814	2.98e-05	5.87798	up
MSTRG.14917.1	MSTRG.14917.1	0.007717	0.496718	3.08e-06	5.89913	up
MSTRG.1795.2	MSTRG.1795.2	0.104612	7.28024	6.22e-08	5.92019	up
ENST00000577684	FLJ35934-001	0.009641	0.64759	2.42e-06	5.95302	up
MSTRG.197552.2	MSTRG.197552.2	0.008179	0.707694	1.21e-05	6.11854	up
ENST00000588784	CTC-459F4.3-002	0.002108	0.325492	7.74e-06	6.22527	up
ENST00000568384	RP11-375I20.6-001	0.018695	1.90596	2.6e-08	6.29355	up
ENST00000414002	SNHG5-002	0.084733	8.83513	2.24e-08	6.32789	up
MSTRG.96329.1	MSTRG.96329.1	0.143859	14.435	1.48e-08	6.35877	up
MSTRG.34867.4	MSTRG.34867.4	0.015886	2.66775	4.33e-07	6.38412	up
MSTRG.151208.3	MSTRG.151208.3	0.001393	0.539214	3.47e-06	6.43552	up
MSTRG.92135.2	MSTRG.92135.2	0.000108	0.502513	3.07e-06	6.47066	up
MSTRG.47371.2	MSTRG.47371.2	0.002681	2.02167	2.56e-06	6.52182	up
MSTRG.119091.1	MSTRG.119091.1	0.003952	0.646359	3.81e-08	6.69085	up
MSTRG.211230.2	MSTRG.211230.2	0.000421	3.03441	1.17e-06	6.71003	up
MSTRG.199531.2	MSTRG.199531.2	0.057381	6.83821	1.16e-07	6.7156	up
MSTRG.128458.7	MSTRG.128458.7	18.694	2036.5	2.43e-10	6.74696	up
MSTRG.8087.1	MSTRG.8087.1	0	0.197777	0.00481584	6.85913	up
MSTRG.157775.1	MSTRG.157775.1	0	0.308949	0.00481584	6.85913	up
MSTRG.42855.1	MSTRG.42855.1	0	0.312661	0.00481584	6.85913	up
MSTRG.127414.1	MSTRG.127414.1	0	0.369793	0.00481584	6.85913	up
MSTRG.174389.1	MSTRG.174389.1	0	0.298873	0.00481584	6.85913	up
MSTRG.194140.1	MSTRG.194140.1	0	0.404632	0.00481584	6.85913	up
MSTRG.200914.4	MSTRG.200914.4	0	0.308195	0.00481584	6.85913	up
MSTRG.47328.1	MSTRG.47328.1	0	0.367789	0.00481584	6.85913	up
MSTRG.155463.1	MSTRG.155463.1	0	0.454733	0.00481584	6.85913	up
MSTRG.53790.1	MSTRG.53790.1	0	0.240207	0.00481584	6.85913	up
MSTRG.13728.1	MSTRG.13728.1	0	0.249835	0.00481584	6.85913	up
MSTRG.164144.1	MSTRG.164144.1	0	0.575735	0.00481584	6.85913	up
MSTRG.195314.1	MSTRG.195314.1	0	0.337965	0.00481584	6.85913	up
MSTRG.211636.1	MSTRG.211636.1	0	0.530222	0.00481584	6.85913	up
MSTRG.197731.1	MSTRG.197731.1	0	0.386197	0.00481584	6.85913	up
MSTRG.106811.1	MSTRG.106811.1	0	0.407025	0.00481584	6.85913	up
MSTRG.97806.1	MSTRG.97806.1	0	0.224558	0.00481584	6.85913	up
MSTRG.138496.1	MSTRG.138496.1	0	0.343558	0.00481584	6.85913	up
MSTRG.169749.1	MSTRG.169749.1	0	0.34221	0.00481584	6.85913	up
MSTRG.86304.1	MSTRG.86304.1	0	0.568733	0.00481584	6.85913	up
MSTRG.204453.1	MSTRG.204453.1	0	0.247741	0.00481584	6.85913	up
MSTRG.14525.1	MSTRG.14525.1	0	0.226648	0.00481584	6.85913	up
MSTRG.132653.1	MSTRG.132653.1	0	0.454733	0.00481584	6.85913	up
MSTRG.211164.1	MSTRG.211164.1	0	0.318637	0.00481584	6.85913	up
MSTRG.202835.1	MSTRG.202835.1	0	0.428917	0.00481584	6.85913	up
MSTRG.198384.6	MSTRG.198384.6	0	0.399552	0.00481584	6.85913	up
MSTRG.138331.1	MSTRG.138331.1	0	0.564392	0.00481584	6.85913	up
MSTRG.127090.1	MSTRG.127090.1	0	0.683883	0.00481584	6.85913	up
MSTRG.161968.1	MSTRG.161968.1	0	0.283543	0.00481584	6.85913	up
MSTRG.18853.1	MSTRG.18853.1	0	0.329482	0.00481584	6.85913	up
MSTRG.81912.1	MSTRG.81912.1	0	0.367906	0.00481584	6.85913	up
MSTRG.46384.2	MSTRG.46384.2	0	0.122323	0.00481584	6.85913	up
MSTRG.27731.1	MSTRG.27731.1	0	0.555422	0.00481584	6.85913	up
MSTRG.105524.1	MSTRG.105524.1	0	0.294484	0.00481584	6.85913	up
MSTRG.103291.1	MSTRG.103291.1	0	0.604263	0.00481584	6.85913	up
MSTRG.188635.1	MSTRG.188635.1	0	0.28963	0.00481584	6.85913	up
MSTRG.169374.1	MSTRG.169374.1	0	0.525662	0.00481584	6.85913	up
MSTRG.121346.1	MSTRG.121346.1	0	0.276095	0.00481584	6.85913	up
MSTRG.182734.1	MSTRG.182734.1	0	0.530852	0.00481584	6.85913	up
MSTRG.150794.1	MSTRG.150794.1	0	0.435211	0.00481584	6.85913	up
MSTRG.32433.4	MSTRG.32433.4	0	0.20312	0.00481584	6.85913	up
MSTRG.65324.1	MSTRG.65324.1	0	0.456127	0.00481584	6.85913	up
MSTRG.213816.1	MSTRG.213816.1	0	0.400705	0.00481584	6.85913	up
MSTRG.196438.1	MSTRG.196438.1	0	0.50966	0.00481584	6.85913	up
MSTRG.24027.1	MSTRG.24027.1	0	0.646669	0.00481584	6.85913	up
MSTRG.211975.1	MSTRG.211975.1	0	0.270121	0.00481584	6.85913	up
MSTRG.123278.1	MSTRG.123278.1	0	0.326924	0.00481584	6.85913	up
MSTRG.89747.1	MSTRG.89747.1	0	0.61535	0.00481584	6.85913	up
MSTRG.14930.1	MSTRG.14930.1	0	0.457619	0.00481584	6.85913	up
MSTRG.141623.2	MSTRG.141623.2	0	0.250088	0.00481584	6.85913	up
MSTRG.109155.1	MSTRG.109155.1	0	0.422239	0.00481584	6.85913	up
MSTRG.126690.10	MSTRG.126690.10	0	0.149778	0.00481584	6.85913	up
MSTRG.53515.1	MSTRG.53515.1	0	0.454733	0.00481584	6.85913	up
MSTRG.85312.2	MSTRG.85312.2	0	0.153815	0.00481584	6.85913	up
MSTRG.97330.1	MSTRG.97330.1	0	0.507938	0.00481584	6.85913	up
MSTRG.116201.1	MSTRG.116201.1	0	0.408012	0.00481584	6.85913	up
MSTRG.12061.1	MSTRG.12061.1	0	0.396882	0.00481584	6.85913	up
MSTRG.114928.1	MSTRG.114928.1	0	0.557348	0.00481584	6.85913	up
MSTRG.208536.3	MSTRG.208536.3	0	0.283799	0.00481584	6.85913	up
ENST00000445174	LINC00607-001	0	0.036415	0.00481584	6.85913	up
ENST00000602805	RP11-457I16.2-002	0	0.230778	0.00481584	6.85913	up
ENST00000439798	AC097713.4-001	0	0.255443	0.00481584	6.85913	up
ENST00000417324	FAM138A-001	0	0.119706	0.00481584	6.85913	up
ENST00000613291	RP11-1143G9.5-001	0	0.02557	0.00481584	6.85913	up
ENST00000523413	RP11-107N7.1-001	0	0.185798	0.00481584	6.85913	up
ENST00000468232	RP11-469J4.3-001	0	0.212762	0.00481584	6.85913	up
ENST00000505518	CTD-2218G20.2-001	0	0.067882	0.00481584	6.85913	up
ENST00000606988	RP11-573G6.9-001	0	0.236594	0.00481584	6.85913	up
MSTRG.212384.2	MSTRG.212384.2	0.007782	1.08391	6.39e-07	6.86334	up
ENST00000530759	RP11-111M22.3-001	0.004854	2.07666	5.55e-07	6.90247	up
MSTRG.119756.1	MSTRG.119756.1	0	0.25444	0.00368003	6.96516	up
MSTRG.17790.1	MSTRG.17790.1	0	0.231189	0.00368003	6.96516	up
MSTRG.135047.1	MSTRG.135047.1	0	0.370468	0.00368003	6.96516	up
MSTRG.22635.1	MSTRG.22635.1	0	0.313966	0.00368003	6.96516	up
MSTRG.42133.1	MSTRG.42133.1	0	0.640333	0.00368003	6.96516	up
MSTRG.187602.1	MSTRG.187602.1	0	0.331084	0.00368003	6.96516	up
MSTRG.126892.1	MSTRG.126892.1	0	0.477146	0.00368003	6.96516	up
MSTRG.136574.1	MSTRG.136574.1	0	0.300105	0.00368003	6.96516	up
MSTRG.64765.1	MSTRG.64765.1	0	0.233717	0.00368003	6.96516	up
MSTRG.189853.1	MSTRG.189853.1	0	0.534101	0.00368003	6.96516	up
MSTRG.189537.1	MSTRG.189537.1	0	0.201066	0.00368003	6.96516	up
MSTRG.123302.2	MSTRG.123302.2	0	0.104087	0.00368003	6.96516	up
MSTRG.141200.1	MSTRG.141200.1	0	0.613741	0.00368003	6.96516	up
MSTRG.99200.1	MSTRG.99200.1	0	0.477146	0.00368003	6.96516	up
MSTRG.69810.1	MSTRG.69810.1	0	0.221989	0.00368003	6.96516	up
MSTRG.172563.1	MSTRG.172563.1	0	0.5309	0.00368003	6.96516	up
MSTRG.95910.1	MSTRG.95910.1	0	0.583288	0.00368003	6.96516	up
MSTRG.189824.1	MSTRG.189824.1	0	0.704008	0.00368003	6.96516	up
MSTRG.20427.1	MSTRG.20427.1	0	0.368224	0.00368003	6.96516	up
MSTRG.155505.1	MSTRG.155505.1	0	0.224237	0.00368003	6.96516	up
MSTRG.13441.1	MSTRG.13441.1	0	0.289833	0.00368003	6.96516	up
MSTRG.139919.1	MSTRG.139919.1	0	0.267369	0.00368003	6.96516	up
MSTRG.102864.1	MSTRG.102864.1	0	0.310312	0.00368003	6.96516	up
MSTRG.138677.1	MSTRG.138677.1	0	0.272957	0.00368003	6.96516	up
MSTRG.129756.1	MSTRG.129756.1	0	0.235154	0.00368003	6.96516	up
MSTRG.10084.1	MSTRG.10084.1	0	0.518214	0.00368003	6.96516	up
MSTRG.11212.9	MSTRG.11212.9	0	0.319103	0.00368003	6.96516	up
MSTRG.106782.2	MSTRG.106782.2	0	0.35313	0.00368003	6.96516	up
MSTRG.92358.1	MSTRG.92358.1	0	0.369986	0.00368003	6.96516	up
MSTRG.89558.1	MSTRG.89558.1	0	0.577505	0.00368003	6.96516	up
MSTRG.108768.1	MSTRG.108768.1	0	0.204303	0.00368003	6.96516	up
MSTRG.114152.1	MSTRG.114152.1	0	0.249608	0.00368003	6.96516	up
MSTRG.101295.1	MSTRG.101295.1	0	0.237282	0.00368003	6.96516	up
MSTRG.45854.1	MSTRG.45854.1	0	0.329345	0.00368003	6.96516	up
MSTRG.200056.1	MSTRG.200056.1	0	0.288043	0.00368003	6.96516	up
MSTRG.75385.1	MSTRG.75385.1	0	0.707484	0.00368003	6.96516	up
MSTRG.31557.1	MSTRG.31557.1	0	0.568347	0.00368003	6.96516	up
MSTRG.208644.1	MSTRG.208644.1	0	0.614103	0.00368003	6.96516	up
MSTRG.39774.1	MSTRG.39774.1	0	0.28927	0.00368003	6.96516	up
MSTRG.88260.1	MSTRG.88260.1	0	0.418071	0.00368003	6.96516	up
MSTRG.135956.1	MSTRG.135956.1	0	0.194862	0.00368003	6.96516	up
MSTRG.83873.1	MSTRG.83873.1	0	0.154344	0.00368003	6.96516	up
MSTRG.153709.2	MSTRG.153709.2	0	0.274212	0.00368003	6.96516	up
MSTRG.18077.1	MSTRG.18077.1	0	0.697475	0.00368003	6.96516	up
MSTRG.180026.1	MSTRG.180026.1	0	0.626016	0.00368003	6.96516	up
MSTRG.146675.1	MSTRG.146675.1	0	0.475101	0.00368003	6.96516	up
MSTRG.99856.1	MSTRG.99856.1	0	0.196982	0.00368003	6.96516	up
MSTRG.144544.1	MSTRG.144544.1	0	0.633417	0.00368003	6.96516	up
MSTRG.21844.1	MSTRG.21844.1	0	0.725499	0.00368003	6.96516	up
MSTRG.119325.1	MSTRG.119325.1	0	0.653581	0.00368003	6.96516	up
MSTRG.133119.3	MSTRG.133119.3	0	0.587408	0.00368003	6.96516	up
MSTRG.170745.16	MSTRG.170745.16	0	0.179042	0.00368003	6.96516	up
MSTRG.203231.1	MSTRG.203231.1	0	0.677212	0.00368003	6.96516	up
MSTRG.46894.1	MSTRG.46894.1	0	0.426588	0.00368003	6.96516	up
MSTRG.58670.1	MSTRG.58670.1	0	0.406918	0.00368003	6.96516	up
MSTRG.150121.1	MSTRG.150121.1	0	0.448513	0.00368003	6.96516	up
MSTRG.165460.1	MSTRG.165460.1	0	0.290524	0.00368003	6.96516	up
MSTRG.55878.1	MSTRG.55878.1	0	0.246681	0.00368003	6.96516	up
MSTRG.185677.1	MSTRG.185677.1	0	0.313938	0.00368003	6.96516	up
MSTRG.53630.1	MSTRG.53630.1	0	0.329657	0.00368003	6.96516	up
MSTRG.9172.1	MSTRG.9172.1	0	0.449236	0.00368003	6.96516	up
MSTRG.174887.1	MSTRG.174887.1	0	0.370027	0.00368003	6.96516	up
MSTRG.110128.1	MSTRG.110128.1	0	0.503238	0.00368003	6.96516	up
MSTRG.62701.1	MSTRG.62701.1	0	0.355883	0.00368003	6.96516	up
MSTRG.22399.2	MSTRG.22399.2	0	0.273273	0.00368003	6.96516	up
MSTRG.105192.1	MSTRG.105192.1	0	0.38643	0.00368003	6.96516	up
MSTRG.58909.1	MSTRG.58909.1	0	0.600081	0.00368003	6.96516	up
MSTRG.164078.1	MSTRG.164078.1	0	0.363616	0.00368003	6.96516	up
MSTRG.101430.1	MSTRG.101430.1	0	0.397218	0.00368003	6.96516	up
MSTRG.86710.12	MSTRG.86710.12	0	0.307785	0.00368003	6.96516	up
MSTRG.24634.1	MSTRG.24634.1	0	0.216271	0.00368003	6.96516	up
MSTRG.107512.1	MSTRG.107512.1	0	0.275029	0.00368003	6.96516	up
MSTRG.39912.1	MSTRG.39912.1	0	0.453654	0.00368003	6.96516	up
MSTRG.76110.1	MSTRG.76110.1	0	0.329129	0.00368003	6.96516	up
MSTRG.127129.1	MSTRG.127129.1	0	0.270942	0.00368003	6.96516	up
MSTRG.195409.2	MSTRG.195409.2	0	0.192643	0.00368003	6.96516	up
MSTRG.39770.1	MSTRG.39770.1	0	0.455411	0.00368003	6.96516	up
MSTRG.91204.1	MSTRG.91204.1	0	0.341535	0.00368003	6.96516	up
MSTRG.42782.3	MSTRG.42782.3	0	0.18328	0.00368003	6.96516	up
MSTRG.128853.1	MSTRG.128853.1	0	0.253787	0.00368003	6.96516	up
MSTRG.194136.1	MSTRG.194136.1	0	0.304551	0.00368003	6.96516	up
MSTRG.194996.1	MSTRG.194996.1	0	0.314265	0.00368003	6.96516	up
ENST00000557928	RP11-16E12.1-002	0	0.32385	0.00368003	6.96516	up
ENST00000457566	RFX3-AS1-002	0	0.314631	0.00368003	6.96516	up
ENST00000635545	LINC00856-010	0	0.264789	0.00368003	6.96516	up
ENST00000636153	LINC00862-004	0	0.125957	0.00368003	6.96516	up
ENST00000450890	RP11-462L8.1-001	0	0.143349	0.00368003	6.96516	up
ENST00000454869	RP11-307E17.8-001	0	0.070666	0.00368003	6.96516	up
ENST00000454307	XX-FW80269A6.1-001	0	0.31743	0.00368003	6.96516	up
ENST00000627179	LINC01338-001	0	0.231798	0.00368003	6.96516	up
ENST00000505861	CTD-2037L6.2-001	0	0.201233	0.00368003	6.96516	up
ENST00000609514	RP11-525A16.4-001	0	0.298434	0.00368003	6.96516	up
ENST00000634735	LINC00856-011	0	0.291501	0.00368003	6.96516	up
ENST00000605240	RP11-326C3.15-001	0	0.29901	0.00368003	6.96516	up
ENST00000628090	AC133644.2-002	0	0.159004	0.00368003	6.96516	up
MSTRG.96332.1	MSTRG.96332.1	0.343131	47.6863	4.28e-10	6.98347	up
MSTRG.116777.1	MSTRG.116777.1	0.002085	0.822145	3.86e-07	6.98985	up
MSTRG.81911.6	MSTRG.81911.6	0.307876	41.1516	1.88e-10	7.01956	up
MSTRG.49138.5	MSTRG.49138.5	0.000978	0.661298	2.98e-07	7.06075	up
MSTRG.87750.1	MSTRG.87750.1	0	0.274852	0.00284366	7.06392	up
MSTRG.163607.1	MSTRG.163607.1	0	0.556421	0.00284366	7.06392	up
MSTRG.65341.1	MSTRG.65341.1	0	0.376211	0.00284366	7.06392	up
MSTRG.30821.1	MSTRG.30821.1	0	0.43262	0.00284366	7.06392	up
MSTRG.119357.1	MSTRG.119357.1	0	0.376847	0.00284366	7.06392	up
MSTRG.18560.1	MSTRG.18560.1	0	0.490097	0.00284366	7.06392	up
MSTRG.156268.1	MSTRG.156268.1	0	0.413245	0.00284366	7.06392	up
MSTRG.96628.1	MSTRG.96628.1	0	0.20026	0.00284366	7.06392	up
MSTRG.213881.1	MSTRG.213881.1	0	0.73476	0.00284366	7.06392	up
MSTRG.61555.1	MSTRG.61555.1	0	0.538563	0.00284366	7.06392	up
MSTRG.105511.11	MSTRG.105511.11	0	0.468604	0.00284366	7.06392	up
MSTRG.176781.1	MSTRG.176781.1	0	0.568721	0.00284366	7.06392	up
MSTRG.88894.9	MSTRG.88894.9	0	0.364801	0.00284366	7.06392	up
MSTRG.145238.1	MSTRG.145238.1	0	0.433676	0.00284366	7.06392	up
MSTRG.68369.1	MSTRG.68369.1	0	0.243844	0.00284366	7.06392	up
MSTRG.85311.1	MSTRG.85311.1	0	0.454913	0.00284366	7.06392	up
MSTRG.200057.1	MSTRG.200057.1	0	0.386037	0.00284366	7.06392	up
MSTRG.169549.1	MSTRG.169549.1	0	0.440469	0.00284366	7.06392	up
MSTRG.73974.1	MSTRG.73974.1	0	0.295839	0.00284366	7.06392	up
MSTRG.128709.1	MSTRG.128709.1	0	0.248829	0.00284366	7.06392	up
MSTRG.118348.1	MSTRG.118348.1	0	0.690053	0.00284366	7.06392	up
MSTRG.75552.1	MSTRG.75552.1	0	0.581799	0.00284366	7.06392	up
MSTRG.16443.1	MSTRG.16443.1	0	0.37922	0.00284366	7.06392	up
MSTRG.7371.1	MSTRG.7371.1	0	0.262591	0.00284366	7.06392	up
MSTRG.186891.1	MSTRG.186891.1	0	0.36481	0.00284366	7.06392	up
MSTRG.113369.1	MSTRG.113369.1	0	0.301214	0.00284366	7.06392	up
MSTRG.126906.1	MSTRG.126906.1	0	0.29704	0.00284366	7.06392	up
MSTRG.200067.2	MSTRG.200067.2	0	0.370026	0.00284366	7.06392	up
MSTRG.8949.1	MSTRG.8949.1	0	0.313097	0.00284366	7.06392	up
MSTRG.168849.1	MSTRG.168849.1	0	0.383588	0.00284366	7.06392	up
MSTRG.205793.1	MSTRG.205793.1	0	0.302453	0.00284366	7.06392	up
MSTRG.45802.1	MSTRG.45802.1	0	0.232248	0.00284366	7.06392	up
MSTRG.60723.1	MSTRG.60723.1	0	0.47368	0.00284366	7.06392	up
MSTRG.179899.10	MSTRG.179899.10	0	0.210835	0.00284366	7.06392	up
MSTRG.69774.3	MSTRG.69774.3	0	0.289753	0.00284366	7.06392	up
MSTRG.81503.1	MSTRG.81503.1	0	0.275426	0.00284366	7.06392	up
MSTRG.108900.1	MSTRG.108900.1	0	0.524651	0.00284366	7.06392	up
MSTRG.126894.1	MSTRG.126894.1	0	0.644678	0.00284366	7.06392	up
MSTRG.28782.1	MSTRG.28782.1	0	0.309909	0.00284366	7.06392	up
MSTRG.195190.1	MSTRG.195190.1	0	0.28381	0.00284366	7.06392	up
MSTRG.171405.1	MSTRG.171405.1	0	0.429987	0.00284366	7.06392	up
MSTRG.176980.1	MSTRG.176980.1	0	0.569105	0.00284366	7.06392	up
MSTRG.91644.1	MSTRG.91644.1	0	0.270456	0.00284366	7.06392	up
MSTRG.197550.3	MSTRG.197550.3	0	0.281012	0.00284366	7.06392	up
MSTRG.195409.3	MSTRG.195409.3	0	0.156778	0.00284366	7.06392	up
MSTRG.123299.1	MSTRG.123299.1	0	0.443693	0.00284366	7.06392	up
MSTRG.141358.1	MSTRG.141358.1	0	0.491764	0.00284366	7.06392	up
ENST00000614400	RP11-74E22.8-001	0	0.053094	0.00284366	7.06392	up
ENST00000476909	LINC00856-003	0	0.209301	0.00284366	7.06392	up
ENST00000584125	RP11-227G15.9-001	0	0.284062	0.00284366	7.06392	up
ENST00000569389	AC009120.4-002	0	0.189884	0.00284366	7.06392	up
ENST00000616810	CTD-3194G12.1-001	0	0.435064	0.00284366	7.06392	up
ENST00000610335	RP11-428O18.6-002	0	0.2627	0.00284366	7.06392	up
ENST00000613170	LINC00926-004	0	0.110439	0.00284366	7.06392	up
ENST00000509999	AC008592.4-001	0	0.366464	0.00284366	7.06392	up
ENST00000490950	LINC01119-001	0	0.131818	0.00284366	7.06392	up
MSTRG.191518.2	MSTRG.191518.2	0	0.202501	0.00222005	7.15636	up
MSTRG.140218.1	MSTRG.140218.1	0	0.202104	0.00222005	7.15636	up
MSTRG.86879.1	MSTRG.86879.1	0	0.289503	0.00222005	7.15636	up
MSTRG.201782.1	MSTRG.201782.1	0	0.420258	0.00222005	7.15636	up
MSTRG.55819.1	MSTRG.55819.1	0	0.283339	0.00222005	7.15636	up
MSTRG.154537.1	MSTRG.154537.1	0	0.384247	0.00222005	7.15636	up
MSTRG.137269.1	MSTRG.137269.1	0	0.415794	0.00222005	7.15636	up
MSTRG.62532.1	MSTRG.62532.1	0	0.25714	0.00222005	7.15636	up
MSTRG.116875.1	MSTRG.116875.1	0	0.662322	0.00222005	7.15636	up
MSTRG.22616.1	MSTRG.22616.1	0	0.346979	0.00222005	7.15636	up
MSTRG.10388.1	MSTRG.10388.1	0	0.569538	0.00222005	7.15636	up
MSTRG.208329.1	MSTRG.208329.1	0	0.273642	0.00222005	7.15636	up
MSTRG.6964.1	MSTRG.6964.1	0	0.547902	0.00222005	7.15636	up
MSTRG.196110.1	MSTRG.196110.1	0	0.382523	0.00222005	7.15636	up
MSTRG.106782.1	MSTRG.106782.1	0	0.351368	0.00222005	7.15636	up
MSTRG.25630.1	MSTRG.25630.1	0	0.407782	0.00222005	7.15636	up
MSTRG.180096.1	MSTRG.180096.1	0	0.340727	0.00222005	7.15636	up
MSTRG.156432.1	MSTRG.156432.1	0	0.467318	0.00222005	7.15636	up
MSTRG.101716.1	MSTRG.101716.1	0	0.270879	0.00222005	7.15636	up
MSTRG.152225.2	MSTRG.152225.2	0	0.450645	0.00222005	7.15636	up
MSTRG.15861.1	MSTRG.15861.1	0	0.672052	0.00222005	7.15636	up
MSTRG.114917.1	MSTRG.114917.1	0	0.287924	0.00222005	7.15636	up
MSTRG.62344.11	MSTRG.62344.11	0	0.274058	0.00222005	7.15636	up
MSTRG.150116.1	MSTRG.150116.1	0	0.314738	0.00222005	7.15636	up
MSTRG.127588.1	MSTRG.127588.1	0	0.584721	0.00222005	7.15636	up
MSTRG.123476.1	MSTRG.123476.1	0	0.521911	0.00222005	7.15636	up
MSTRG.5253.1	MSTRG.5253.1	0	0.537618	0.00222005	7.15636	up
MSTRG.20768.3	MSTRG.20768.3	0	0.290952	0.00222005	7.15636	up
MSTRG.97810.1	MSTRG.97810.1	0	0.354044	0.00222005	7.15636	up
MSTRG.38935.11	MSTRG.38935.11	0	0.408869	0.00222005	7.15636	up
MSTRG.183205.1	MSTRG.183205.1	0	0.538681	0.00222005	7.15636	up
MSTRG.113610.2	MSTRG.113610.2	0	0.175728	0.00222005	7.15636	up
MSTRG.127059.1	MSTRG.127059.1	0	0.429769	0.00222005	7.15636	up
MSTRG.21536.1	MSTRG.21536.1	0	0.511527	0.00222005	7.15636	up
MSTRG.143188.1	MSTRG.143188.1	0	0.319084	0.00222005	7.15636	up
MSTRG.59554.1	MSTRG.59554.1	0	0.390535	0.00222005	7.15636	up
MSTRG.25977.1	MSTRG.25977.1	0	0.593644	0.00222005	7.15636	up
MSTRG.175743.1	MSTRG.175743.1	0	0.46945	0.00222005	7.15636	up
MSTRG.196341.1	MSTRG.196341.1	0	0.27754	0.00222005	7.15636	up
MSTRG.84536.1	MSTRG.84536.1	0	0.383321	0.00222005	7.15636	up
MSTRG.193417.1	MSTRG.193417.1	0	0.304705	0.00222005	7.15636	up
MSTRG.165591.1	MSTRG.165591.1	0	0.311927	0.00222005	7.15636	up
MSTRG.141169.1	MSTRG.141169.1	0	0.260479	0.00222005	7.15636	up
MSTRG.21561.1	MSTRG.21561.1	0	0.441664	0.00222005	7.15636	up
MSTRG.52636.1	MSTRG.52636.1	0	0.246111	0.00222005	7.15636	up
MSTRG.70208.1	MSTRG.70208.1	0	0.609055	0.00222005	7.15636	up
MSTRG.154308.1	MSTRG.154308.1	0	0.634261	0.00222005	7.15636	up
MSTRG.127070.1	MSTRG.127070.1	0	0.390893	0.00222005	7.15636	up
ENST00000623575	CH507-24F1.2-003	0	0.289694	0.00222005	7.15636	up
ENST00000565959	AP000265.1-001	0	0.09506	0.00222005	7.15636	up
ENST00000535487	RP11-474D1.2-001	0	0.102674	0.00222005	7.15636	up
ENST00000430897	AC099344.2-001	0	0.162374	0.00222005	7.15636	up
ENST00000400306	RP11-542B15.1-001	0	0.100326	0.00222005	7.15636	up
ENST00000556019	LINC01588-009	0	0.314534	0.00222005	7.15636	up
ENST00000594764	RGPD4-AS1-004	0	0.264413	0.00222005	7.15636	up
ENST00000629273	SOX2-OT-040	0	0.296669	0.00222005	7.15636	up
ENST00000501071	RP11-480D4.1-001	0	0.109531	0.00222005	7.15636	up
ENST00000417089	H19-005	0.003592	1.05812	1.69e-07	7.19288	up
MSTRG.120676.2	MSTRG.120676.2	0.001575	0.63702	1.56e-07	7.21378	up
MSTRG.210319.2	MSTRG.210319.2	0	0.558785	0.00139116	7.24323	up
MSTRG.8700.1	MSTRG.8700.1	0	0.26528	0.00139116	7.24323	up
MSTRG.23796.1	MSTRG.23796.1	0	0.310524	0.00139116	7.24323	up
MSTRG.81213.1	MSTRG.81213.1	0	0.844847	0.00139116	7.24323	up
MSTRG.115709.2	MSTRG.115709.2	0	0.592167	0.00139116	7.24323	up
MSTRG.52435.2	MSTRG.52435.2	0	0.199456	0.00139116	7.24323	up
MSTRG.29791.1	MSTRG.29791.1	0	0.2582	0.00139116	7.24323	up
MSTRG.29791.2	MSTRG.29791.2	0	0.373457	0.00139116	7.24323	up
MSTRG.148127.1	MSTRG.148127.1	0	0.323733	0.00139116	7.24323	up
MSTRG.110547.1	MSTRG.110547.1	0	0.667234	0.00139116	7.24323	up
MSTRG.183851.1	MSTRG.183851.1	0	0.234583	0.00139116	7.24323	up
MSTRG.38262.1	MSTRG.38262.1	0	0.772423	0.00139116	7.24323	up
MSTRG.154058.1	MSTRG.154058.1	0	0.534689	0.00139116	7.24323	up
MSTRG.136799.1	MSTRG.136799.1	0	0.287651	0.00139116	7.24323	up
MSTRG.144267.1	MSTRG.144267.1	0	0.402311	0.00139116	7.24323	up
MSTRG.91785.1	MSTRG.91785.1	0	0.383823	0.00139116	7.24323	up
MSTRG.144271.3	MSTRG.144271.3	0	0.367092	0.00139116	7.24323	up
MSTRG.107407.1	MSTRG.107407.1	0	0.258013	0.00139116	7.24323	up
MSTRG.30720.1	MSTRG.30720.1	0	0.302303	0.00139116	7.24323	up
MSTRG.171758.1	MSTRG.171758.1	0	0.275694	0.00139116	7.24323	up
MSTRG.180956.2	MSTRG.180956.2	0	0.428925	0.00139116	7.24323	up
MSTRG.58215.1	MSTRG.58215.1	0	0.283849	0.00139116	7.24323	up
MSTRG.199062.2	MSTRG.199062.2	0	0.302895	0.00139116	7.24323	up
MSTRG.186639.1	MSTRG.186639.1	0	0.234717	0.00139116	7.24323	up
MSTRG.121363.1	MSTRG.121363.1	0	0.44453	0.00139116	7.24323	up
MSTRG.151336.1	MSTRG.151336.1	0	0.414992	0.00139116	7.24323	up
MSTRG.144435.1	MSTRG.144435.1	0	0.541702	0.00139116	7.24323	up
MSTRG.78605.1	MSTRG.78605.1	0	0.376951	0.00139116	7.24323	up
MSTRG.42243.1	MSTRG.42243.1	0	0.366129	0.00139116	7.24323	up
MSTRG.199301.1	MSTRG.199301.1	0	0.384534	0.00139116	7.24323	up
MSTRG.11592.1	MSTRG.11592.1	0	0.460496	0.00139116	7.24323	up
MSTRG.210970.3	MSTRG.210970.3	0	0.25537	0.00139116	7.24323	up
MSTRG.82660.1	MSTRG.82660.1	0	0.43336	0.00139116	7.24323	up
MSTRG.72694.1	MSTRG.72694.1	0	0.52273	0.00139116	7.24323	up
MSTRG.110229.1	MSTRG.110229.1	0	0.454355	0.00139116	7.24323	up
MSTRG.53128.1	MSTRG.53128.1	0	0.42229	0.00139116	7.24323	up
MSTRG.56109.1	MSTRG.56109.1	0	0.279668	0.00139116	7.24323	up
MSTRG.67015.1	MSTRG.67015.1	0	0.32046	0.00139116	7.24323	up
MSTRG.152851.1	MSTRG.152851.1	0	0.4315	0.00139116	7.24323	up
MSTRG.209936.4	MSTRG.209936.4	0	0.241568	0.00139116	7.24323	up
MSTRG.163386.1	MSTRG.163386.1	0	0.406109	0.00139116	7.24323	up
MSTRG.100085.1	MSTRG.100085.1	0	0.286008	0.00139116	7.24323	up
MSTRG.43498.1	MSTRG.43498.1	0	0.23944	0.00139116	7.24323	up
MSTRG.55601.1	MSTRG.55601.1	0	0.32972	0.00139116	7.24323	up
MSTRG.13431.1	MSTRG.13431.1	0	0.372628	0.00139116	7.24323	up
MSTRG.188382.2	MSTRG.188382.2	0	0.303168	0.00139116	7.24323	up
MSTRG.116115.1	MSTRG.116115.1	0	0.725345	0.00139116	7.24323	up
MSTRG.105583.2	MSTRG.105583.2	0	0.250435	0.00139116	7.24323	up
MSTRG.2994.1	MSTRG.2994.1	0	0.236718	0.00139116	7.24323	up
MSTRG.137241.1	MSTRG.137241.1	0	0.639511	0.00139116	7.24323	up
MSTRG.200997.2	MSTRG.200997.2	0	0.328456	0.00139116	7.24323	up
ENST00000326734	FAM87B-001	0	0.096382	0.00139116	7.24323	up
ENST00000631502	CTA-286B10.8-001	0	0.222424	0.00139116	7.24323	up
ENST00000432741	CCDC18-AS1-014	0	0.338596	0.00139116	7.24323	up
ENST00000508763	RP11-834C11.5-001	0	0.253331	0.00139116	7.24323	up
ENST00000549004	RP11-181C3.1-002	0	0.594276	0.00139116	7.24323	up
ENST00000456265	RP5-1069C8.2-001	0	0.062607	0.00139116	7.24323	up
ENST00000504957	RP11-18H21.3-001	0	0.368112	0.00139116	7.24323	up
ENST00000618067	CTB-75G16.3-001	0	0.285445	0.00139116	7.24323	up
ENST00000543611	RP11-324E6.6-001	0	0.10485	0.00139116	7.24323	up
ENST00000560503	RP11-82L7.4-001	0	0.2495	0.00139116	7.24323	up
MSTRG.116912.1	MSTRG.116912.1	0	0.892333	0.00111513	7.32516	up
MSTRG.183673.1	MSTRG.183673.1	0	0.400109	0.00111513	7.32516	up
MSTRG.204898.1	MSTRG.204898.1	0	0.300278	0.00111513	7.32516	up
MSTRG.165140.1	MSTRG.165140.1	0	0.119329	0.00111513	7.32516	up
MSTRG.47177.1	MSTRG.47177.1	0	0.280999	0.00111513	7.32516	up
MSTRG.19741.1	MSTRG.19741.1	0	0.888703	0.00111513	7.32516	up
MSTRG.82069.2	MSTRG.82069.2	0	0.330028	0.00111513	7.32516	up
MSTRG.11807.1	MSTRG.11807.1	0	0.266623	0.00111513	7.32516	up
MSTRG.76337.1	MSTRG.76337.1	0	0.249694	0.00111513	7.32516	up
MSTRG.213818.1	MSTRG.213818.1	0	0.401269	0.00111513	7.32516	up
MSTRG.199200.1	MSTRG.199200.1	0	0.638453	0.00111513	7.32516	up
MSTRG.48892.1	MSTRG.48892.1	0	0.297422	0.00111513	7.32516	up
MSTRG.122455.1	MSTRG.122455.1	0	0.477319	0.00111513	7.32516	up
MSTRG.34673.1	MSTRG.34673.1	0	0.458755	0.00111513	7.32516	up
MSTRG.60123.1	MSTRG.60123.1	0	0.769521	0.00111513	7.32516	up
MSTRG.199720.2	MSTRG.199720.2	0	0.876693	0.00111513	7.32516	up
MSTRG.153709.3	MSTRG.153709.3	0	0.309838	0.00111513	7.32516	up
MSTRG.173091.1	MSTRG.173091.1	0	0.46244	0.00111513	7.32516	up
MSTRG.145460.3	MSTRG.145460.3	0	0.385883	0.00111513	7.32516	up
MSTRG.14328.1	MSTRG.14328.1	0	0.433046	0.00111513	7.32516	up
MSTRG.69350.1	MSTRG.69350.1	0	0.437712	0.00111513	7.32516	up
MSTRG.52853.1	MSTRG.52853.1	0	0.822246	0.00111513	7.32516	up
MSTRG.99706.1	MSTRG.99706.1	0	0.52188	0.00111513	7.32516	up
MSTRG.37510.1	MSTRG.37510.1	0	0.43829	0.00111513	7.32516	up
MSTRG.199758.1	MSTRG.199758.1	0	0.244464	0.00111513	7.32516	up
MSTRG.41467.1	MSTRG.41467.1	0	0.273913	0.00111513	7.32516	up
MSTRG.7746.1	MSTRG.7746.1	0	0.352316	0.00111513	7.32516	up
MSTRG.143075.1	MSTRG.143075.1	0	0.274094	0.00111513	7.32516	up
MSTRG.13081.1	MSTRG.13081.1	0	0.468064	0.00111513	7.32516	up
MSTRG.151751.1	MSTRG.151751.1	0	0.512009	0.00111513	7.32516	up
ENST00000565072	RP11-42I10.1-003	0	0.287617	0.00111513	7.32516	up
ENST00000564741	CTC-471C19.1-001	0	0.061109	0.00111513	7.32516	up
ENST00000429679	GS1-259H13.2-003	0	0.407972	0.00111513	7.32516	up
ENST00000608615	KB-208E9.1-001	0	0.186142	0.00111513	7.32516	up
ENST00000503580	LINC01060-006	0	0.481386	0.00111513	7.32516	up
ENST00000602823	RP3-331H24.5-001	0	0.273907	0.00111513	7.32516	up
ENST00000565823	CTB-36H16.2-001	0	0.089205	0.00111513	7.32516	up
ENST00000560238	RP11-69G7.1-001	0	0.300099	0.00111513	7.32516	up
ENST00000506633	SLC25A30-AS1-001	0	0.27535	0.00111513	7.32516	up
ENST00000501718	RP11-700H6.1-001	0	0.096042	0.00111513	7.32516	up
MSTRG.17005.2	MSTRG.17005.2	0	0.118804	0.000900684	7.40269	up
MSTRG.127113.1	MSTRG.127113.1	0	0.315564	0.000900684	7.40269	up
MSTRG.54588.1	MSTRG.54588.1	0	0.321251	0.000900684	7.40269	up
MSTRG.61494.2	MSTRG.61494.2	0	0.427335	0.000900684	7.40269	up
MSTRG.110586.1	MSTRG.110586.1	0	0.45245	0.000900684	7.40269	up
MSTRG.87274.1	MSTRG.87274.1	0	0.406238	0.000900684	7.40269	up
MSTRG.95915.1	MSTRG.95915.1	0	0.90324	0.000900684	7.40269	up
MSTRG.183394.1	MSTRG.183394.1	0	0.34221	0.000900684	7.40269	up
MSTRG.123972.1	MSTRG.123972.1	0	0.383723	0.000900684	7.40269	up
MSTRG.109339.6	MSTRG.109339.6	0	0.221814	0.000900684	7.40269	up
MSTRG.61419.1	MSTRG.61419.1	0	0.286662	0.000900684	7.40269	up
MSTRG.43524.1	MSTRG.43524.1	0	0.374789	0.000900684	7.40269	up
MSTRG.61654.1	MSTRG.61654.1	0	0.711263	0.000900684	7.40269	up
MSTRG.66361.2	MSTRG.66361.2	0	0.223547	0.000900684	7.40269	up
MSTRG.83193.1	MSTRG.83193.1	0	0.206398	0.000900684	7.40269	up
MSTRG.14281.2	MSTRG.14281.2	0	0.237093	0.000900684	7.40269	up
MSTRG.77669.1	MSTRG.77669.1	0	0.498654	0.000900684	7.40269	up
MSTRG.36948.1	MSTRG.36948.1	0	0.62404	0.000900684	7.40269	up
MSTRG.127269.1	MSTRG.127269.1	0	0.873015	0.000900684	7.40269	up
MSTRG.133682.2	MSTRG.133682.2	0	0.588732	0.000900684	7.40269	up
MSTRG.30887.1	MSTRG.30887.1	0	0.324826	0.000900684	7.40269	up
MSTRG.100882.1	MSTRG.100882.1	0	0.272622	0.000900684	7.40269	up
MSTRG.207734.1	MSTRG.207734.1	0	0.486037	0.000900684	7.40269	up
MSTRG.35114.2	MSTRG.35114.2	0	0.2592	0.000900684	7.40269	up
MSTRG.3716.1	MSTRG.3716.1	0	0.554565	0.000900684	7.40269	up
MSTRG.88341.1	MSTRG.88341.1	0	0.326667	0.000900684	7.40269	up
MSTRG.77476.1	MSTRG.77476.1	0	0.360608	0.000900684	7.40269	up
MSTRG.42693.1	MSTRG.42693.1	0	0.774616	0.000900684	7.40269	up
MSTRG.175224.1	MSTRG.175224.1	0	0.287867	0.000900684	7.40269	up
MSTRG.125833.1	MSTRG.125833.1	0	0.41583	0.000900684	7.40269	up
MSTRG.118519.1	MSTRG.118519.1	0	0.50543	0.000900684	7.40269	up
MSTRG.90766.1	MSTRG.90766.1	0	0.234869	0.000900684	7.40269	up
MSTRG.124272.1	MSTRG.124272.1	0	0.197531	0.000900684	7.40269	up
MSTRG.4943.1	MSTRG.4943.1	0	0.435019	0.000900684	7.40269	up
MSTRG.102677.1	MSTRG.102677.1	0	0.254163	0.000900684	7.40269	up
ENST00000556646	RP11-486O13.4-001	0	0.367515	0.000900684	7.40269	up
ENST00000304425	MIR31HG-001	0	0.273774	0.000900684	7.40269	up
ENST00000422357	AP001062.8-002	0	0.291715	0.000900684	7.40269	up
ENST00000635455	RP11-550H2.1-001	0	0.211673	0.000900684	7.40269	up
ENST00000553932	LINC00639-001	0	0.044755	0.000900684	7.40269	up
ENST00000424205	APCDD1L-AS1-005	0	0.352497	0.000900684	7.40269	up
MSTRG.165024.1	MSTRG.165024.1	0.04177	9.58981	5.84e-09	7.4318	up
MSTRG.11221.1	MSTRG.11221.1	0.191757	39.4899	1.18e-10	7.44941	up
MSTRG.95906.6	MSTRG.95906.6	0.037632	10.0252	4.98e-09	7.47388	up
MSTRG.114705.1	MSTRG.114705.1	0	0.172319	0.000732646	7.47626	up
MSTRG.90126.2	MSTRG.90126.2	0	0.22324	0.000732646	7.47626	up
MSTRG.50819.1	MSTRG.50819.1	0	0.611705	0.000732646	7.47626	up
MSTRG.87173.1	MSTRG.87173.1	0	0.359449	0.000732646	7.47626	up
MSTRG.56263.1	MSTRG.56263.1	0	0.308157	0.000732646	7.47626	up
MSTRG.20899.1	MSTRG.20899.1	0	0.397332	0.000732646	7.47626	up
MSTRG.144271.1	MSTRG.144271.1	0	0.437148	0.000732646	7.47626	up
MSTRG.2837.1	MSTRG.2837.1	0	0.626969	0.000732646	7.47626	up
MSTRG.66404.1	MSTRG.66404.1	0	0.537266	0.000732646	7.47626	up
MSTRG.129486.1	MSTRG.129486.1	0	0.221729	0.000732646	7.47626	up
MSTRG.120959.1	MSTRG.120959.1	0	0.372628	0.000732646	7.47626	up
MSTRG.170507.1	MSTRG.170507.1	0	0.410174	0.000732646	7.47626	up
MSTRG.188930.1	MSTRG.188930.1	0	0.542443	0.000732646	7.47626	up
MSTRG.40502.5	MSTRG.40502.5	0	0.325432	0.000732646	7.47626	up
MSTRG.2980.1	MSTRG.2980.1	0	0.397736	0.000732646	7.47626	up
MSTRG.129210.1	MSTRG.129210.1	0	0.546459	0.000732646	7.47626	up
MSTRG.25998.1	MSTRG.25998.1	0	0.499839	0.000732646	7.47626	up
MSTRG.133444.1	MSTRG.133444.1	0	0.485828	0.000732646	7.47626	up
MSTRG.105274.2	MSTRG.105274.2	0	0.663141	0.000732646	7.47626	up
MSTRG.194879.1	MSTRG.194879.1	0	0.695341	0.000732646	7.47626	up
MSTRG.51647.1	MSTRG.51647.1	0	0.926603	0.000732646	7.47626	up
MSTRG.170745.3	MSTRG.170745.3	0	0.425612	0.000732646	7.47626	up
MSTRG.51270.1	MSTRG.51270.1	0	0.350201	0.000732646	7.47626	up
MSTRG.153709.1	MSTRG.153709.1	0	0.337199	0.000732646	7.47626	up
MSTRG.21362.1	MSTRG.21362.1	0	0.457914	0.000732646	7.47626	up
MSTRG.14342.1	MSTRG.14342.1	0	0.499322	0.000732646	7.47626	up
MSTRG.65166.1	MSTRG.65166.1	0	0.38388	0.000732646	7.47626	up
MSTRG.22309.1	MSTRG.22309.1	0	0.931571	0.000732646	7.47626	up
MSTRG.93719.1	MSTRG.93719.1	0	0.32394	0.000732646	7.47626	up
MSTRG.121913.1	MSTRG.121913.1	0	0.43654	0.000732646	7.47626	up
MSTRG.205820.1	MSTRG.205820.1	0	0.613484	0.000732646	7.47626	up
MSTRG.198509.1	MSTRG.198509.1	0	0.292401	0.000732646	7.47626	up
MSTRG.130212.1	MSTRG.130212.1	0	0.599911	0.000732646	7.47626	up
MSTRG.115925.1	MSTRG.115925.1	0	0.309511	0.000732646	7.47626	up
MSTRG.37297.2	MSTRG.37297.2	0	0.523096	0.000732646	7.47626	up
MSTRG.9948.1	MSTRG.9948.1	0	0.470939	0.000732646	7.47626	up
MSTRG.19930.1	MSTRG.19930.1	0	0.281137	0.000732646	7.47626	up
MSTRG.2194.1	MSTRG.2194.1	0	0.376721	0.000732646	7.47626	up
MSTRG.37683.1	MSTRG.37683.1	0	0.448054	0.000732646	7.47626	up
MSTRG.103539.1	MSTRG.103539.1	0	0.503807	0.000732646	7.47626	up
MSTRG.42780.6	MSTRG.42780.6	0	0.330419	0.000732646	7.47626	up
MSTRG.156398.1	MSTRG.156398.1	0	0.313817	0.000732646	7.47626	up
MSTRG.177176.1	MSTRG.177176.1	0	0.504689	0.000732646	7.47626	up
MSTRG.75437.3	MSTRG.75437.3	0	0.390339	0.000732646	7.47626	up
MSTRG.133660.1	MSTRG.133660.1	0	0.378332	0.000732646	7.47626	up
ENST00000535163	RP11-428G5.5-001	0	0.257004	0.000732646	7.47626	up
ENST00000621058	LINC00623-001	0	0.286934	0.000732646	7.47626	up
ENST00000588341	RP11-1018N14.5-001	0	0.078534	0.000732646	7.47626	up
ENST00000562203	RP11-356C4.3-001	0	0.522396	0.000732646	7.47626	up
ENST00000413755	SNHG17-008	0	0.330919	0.000732646	7.47626	up
ENST00000588717	CTD-2162K18.3-001	0	0.101188	0.000732646	7.47626	up
ENST00000605007	RP11-274B21.9-001	0	0.176344	0.000732646	7.47626	up
ENST00000505978	RP11-1018N14.3-001	0	0.337503	0.000732646	7.47626	up
ENST00000587762	MIR24-2-001	5e-06	1.05193	5.29e-08	7.47834	up
MSTRG.46567.1	MSTRG.46567.1	0	0.239193	0.00059992	7.54627	up
MSTRG.193114.1	MSTRG.193114.1	0	0.36923	0.00059992	7.54627	up
MSTRG.93962.7	MSTRG.93962.7	0	0.296709	0.00059992	7.54627	up
MSTRG.8474.3	MSTRG.8474.3	0	0.358857	0.00059992	7.54627	up
MSTRG.20759.1	MSTRG.20759.1	0	0.43164	0.00059992	7.54627	up
MSTRG.130926.1	MSTRG.130926.1	0	0.761297	0.00059992	7.54627	up
MSTRG.51686.1	MSTRG.51686.1	0	0.308086	0.00059992	7.54627	up
MSTRG.61245.1	MSTRG.61245.1	0	0.472982	0.00059992	7.54627	up
MSTRG.119893.1	MSTRG.119893.1	0	0.476355	0.00059992	7.54627	up
[truncated: 619 more rows]
