# Supplementary material for: LINC00629, a KLF10-responsive lncRNA, promotes the anticancer effects of apigenin by decreasing Mcl1 stability in oral squamous cell carcinoma
Source: Aging (Albany NY). 2022 Nov 28;14(22):9149–66. doi: 10.18632/aging.204396 (PMC9740369; doi:10.18632/aging.204396)
Supplement: Supplementary Table 3 [file aging-14-204396-s004.xlsx]

## Sheet: Sheet1
Supplementary Table 3. The altered transcription factors identified by RNA sequencing analysis.
ENSG_ID	gene symbol	log2FC	regulated	Family
ENSG00000179922	ZNF784	-11.434	down	zf-C2H2
ENSG00000203883	SOX18	-10.6518	down	HMG
ENSG00000264668	RP13-582O9.6	-10.5032	down	zf-C2H2
ENSG00000167771	RCOR2	-9.86758	down	MYB
ENSG00000141448	GATA6	-8.96961	down	zf-GATA
ENSG00000165821	SALL2	-4.39396	down	zf-C2H2
ENSG00000125618	PAX8	-4.10344	down	PAX
ENSG00000177494	ZBED2	-4.07543	down	zf-BED
ENSG00000179627	ZBTB42	-3.77094	down	ZBTB
ENSG00000183770	FOXL2	-3.53599	down	Fork_head
ENSG00000143867	OSR1	-3.41616	down	zf-C2H2
ENSG00000138136	LBX1	-3.41209	down	Homeobox
ENSG00000170485	NPAS2	-3.31811	down	bHLH
ENSG00000169554	ZEB2	-3.30363	down	zf-C2H2
ENSG00000116017	ARID3A	-3.23187	down	ARID
ENSG00000196092	PAX5	-3.21507	down	PAX
ENSG00000125850	OVOL2	-3.17733	down	zf-C2H2
ENSG00000214652	ZNF727	-3.17398	down	zf-C2H2
ENSG00000167034	NKX3-1	-3.03599	down	Homeobox
ENSG00000275410	HNF1B	-3.03439	down	Homeobox
ENSG00000124766	SOX4	-2.93788	down	HMG
ENSG00000167528	ZNF641	-2.7369	down	zf-C2H2
ENSG00000135899	SP110	-2.6388	down	SAND
ENSG00000143995	MEIS1	-2.62983	down	Homeobox
ENSG00000106571	GLI3	-2.53895	down	zf-C2H2
ENSG00000100625	SIX4	-2.53445	down	Homeobox
ENSG00000006704	GTF2IRD1	-2.52661	down	GTF2I
ENSG00000152284	TCF7L1	-2.50832	down	HMG
ENSG00000129514	FOXA1	-2.48596	down	Fork_head
ENSG00000007372	PAX6	-2.48433	down	PAX
ENSG00000136367	ZFHX2	-2.44754	down	Homeobox
ENSG00000179111	HES7	-2.44422	down	bHLH
ENSG00000106006	HOXA6	-2.44389	down	Homeobox
ENSG00000198546	ZNF511	-2.39656	down	Others
ENSG00000144485	HES6	-2.34844	down	bHLH
ENSG00000168062	BATF2	-2.33094	down	TF_bZIP
ENSG00000176472	ZNF575	-2.29113	down	zf-C2H2
ENSG00000147124	ZNF41	-2.22331	down	zf-C2H2
ENSG00000235109	ZSCAN31	-2.18837	down	zf-C2H2
ENSG00000006468	ETV1	-2.18257	down	ETS
ENSG00000178917	ZNF852	-2.1679	down	zf-C2H2
ENSG00000131788	PIAS3	-2.15842	down	zf-MIZ
ENSG00000198945	L3MBTL3	-2.1356	down	Others
ENSG00000178665	ZNF713	-2.12921	down	zf-C2H2
ENSG00000095951	HIVEP1	-2.12453	down	zf-C2H2
ENSG00000204304	PBX2	-2.12409	down	Homeobox
ENSG00000007866	TEAD3	-2.11936	down	TEA
ENSG00000132024	CC2D1A	-2.11552	down	Others
ENSG00000115112	TFCP2L1	-2.04841	down	CP2
ENSG00000059378	PARP12	-2.02731	down	Others
ENSG00000118922	KLF12	-2.01668	down	zf-C2H2
ENSG00000137834	SMAD6	-2.01418	down	MH1
ENSG00000196150	ZNF250	2.01338	up	zf-C2H2
ENSG00000064489	BORCS8-MEF2B	2.01504	up	SRF
ENSG00000197044	ZNF441	2.01799	up	zf-C2H2
ENSG00000085644	ZNF213	2.02289	up	zf-C2H2
ENSG00000105708	ZNF14	2.02507	up	zf-C2H2
ENSG00000183309	ZNF623	2.03215	up	zf-C2H2
ENSG00000184939	ZFP90	2.03278	up	zf-C2H2
ENSG00000181449	SOX2	2.05256	up	HMG
ENSG00000188786	MTF1	2.05702	up	zf-C2H2
ENSG00000188283	ZNF383	2.05945	up	zf-C2H2
ENSG00000213799	ZNF845	2.06858	up	zf-C2H2
ENSG00000083817	ZNF416	2.07084	up	zf-C2H2
ENSG00000169155	ZBTB43	2.09645	up	ZBTB
ENSG00000144655	CSRNP1	2.10168	up	CSRNP_N
ENSG00000188868	ZNF563	2.10256	up	zf-C2H2
ENSG00000138380	CARF	2.10479	up	Others
ENSG00000122482	ZNF644	2.10695	up	zf-C2H2
ENSG00000065978	YBX1	2.10809	up	CSD
ENSG00000158691	ZSCAN12	2.12192	up	zf-C2H2
ENSG00000142409	ZNF787	2.14655	up	zf-C2H2
ENSG00000134107	BHLHE40	2.1513	up	bHLH
ENSG00000256683	ZNF350	2.16574	up	zf-C2H2
ENSG00000169714	CNBP	2.18808	up	Others
ENSG00000196357	ZNF565	2.18976	up	zf-C2H2
ENSG00000152433	ZNF547	2.21608	up	zf-C2H2
ENSG00000163795	ZNF513	2.23077	up	zf-C2H2
ENSG00000267041	ZNF850	2.28117	up	zf-C2H2
ENSG00000203326	ZNF525	2.28657	up	zf-C2H2
ENSG00000162086	ZNF75A	2.29979	up	zf-C2H2
ENSG00000204524	ZNF805	2.30991	up	zf-C2H2
ENSG00000197363	ZNF517	2.33049	up	zf-C2H2
ENSG00000166526	ZNF3	2.33534	up	zf-C2H2
ENSG00000189042	ZNF567	2.34991	up	zf-C2H2
ENSG00000120784	ZFP30	2.35387	up	zf-C2H2
ENSG00000197497	ZNF665	2.36376	up	zf-C2H2
ENSG00000162419	GMEB1	2.38276	up	SAND
ENSG00000129028	THAP10	2.38533	up	THAP
ENSG00000153234	NR4A2	2.38664	up	NGFIB-like
ENSG00000173451	THAP2	2.38729	up	THAP
ENSG00000197961	ZNF121	2.41876	up	zf-C2H2
ENSG00000116604	MEF2D	2.44925	up	SRF
ENSG00000166529	ZSCAN21	2.45083	up	zf-C2H2
ENSG00000140009	ESR2	2.48316	up	ESR-like
ENSG00000173875	ZNF791	2.4898	up	zf-C2H2
ENSG00000175691	ZNF77	2.53743	up	zf-C2H2
ENSG00000180479	ZNF571	2.54758	up	zf-C2H2
ENSG00000155090	KLF10	2.54988	up	zf-C2H2
ENSG00000170631	ZNF16	2.56077	up	zf-C2H2
ENSG00000102870	ZNF629	2.57063	up	zf-C2H2
ENSG00000221923	ZNF880	2.61523	up	zf-C2H2
ENSG00000221869	CEBPD	2.62544	up	TF_bZIP
ENSG00000125846	ZNF133	2.63637	up	zf-C2H2
ENSG00000204514	ZNF814	2.6406	up	zf-C2H2
ENSG00000251369	ZNF550	2.6542	up	zf-C2H2
ENSG00000184492	FOXD4L1	2.65711	up	Fork_head
ENSG00000117036	ETV3	2.66467	up	ETS
ENSG00000070444	MNT	2.68187	up	bHLH
ENSG00000170689	HOXB9	2.68833	up	Homeobox
ENSG00000130544	ZNF557	2.71615	up	zf-C2H2
ENSG00000171425	ZNF581	2.71619	up	zf-C2H2
ENSG00000198298	ZNF485	2.71722	up	zf-C2H2
ENSG00000177125	ZBTB34	2.74071	up	ZBTB
ENSG00000170100	ZNF778	2.77764	up	zf-C2H2
ENSG00000167377	ZNF23	2.79298	up	zf-C2H2
ENSG00000197608	ZNF841	2.81073	up	zf-C2H2
ENSG00000105732	ZNF574	2.81686	up	zf-C2H2
ENSG00000129194	SOX15	2.87645	up	HMG
ENSG00000121417	ZNF211	2.91153	up	zf-C2H2
ENSG00000213015	ZNF580	2.92825	up	zf-C2H2
ENSG00000147789	ZNF7	2.9523	up	zf-C2H2
ENSG00000204060	FOXO6	2.98902	up	Fork_head
ENSG00000187559	FOXD4L3	3.00927	up	Fork_head
ENSG00000197063	MAFG	3.0653	up	TF_bZIP
ENSG00000171223	JUNB	3.12037	up	TF_bZIP
ENSG00000130803	ZNF317	3.15056	up	zf-C2H2
ENSG00000170345	FOS	3.17559	up	TF_bZIP
ENSG00000172748	ZNF596	3.2087	up	zf-C2H2
ENSG00000185513	L3MBTL1	3.33635	up	zf-C2HC
ENSG00000204947	ZNF425	3.34475	up	zf-C2H2
ENSG00000123358	NR4A1	3.35164	up	NGFIB-like
ENSG00000196724	ZNF418	3.38003	up	zf-C2H2
ENSG00000171970	ZNF57	3.40094	up	zf-C2H2
ENSG00000196110	ZNF699	3.44292	up	zf-C2H2
ENSG00000160961	ZNF333	3.54366	up	zf-C2H2
ENSG00000175213	ZNF408	3.63692	up	zf-C2H2
ENSG00000120738	EGR1	3.65512	up	zf-C2H2
ENSG00000167384	ZNF180	3.74496	up	zf-C2H2
ENSG00000169594	BNC1	3.74909	up	zf-C2H2
ENSG00000266265	KLF14	3.80019	up	zf-C2H2
ENSG00000125740	FOSB	3.94634	up	TF_bZIP
ENSG00000177374	HIC1	3.9976	up	ZBTB
ENSG00000116819	TFAP2E	4.10491	up	AP-2
ENSG00000258405	ZNF578	4.17878	up	zf-C2H2
ENSG00000186300	ZNF555	4.20528	up	zf-C2H2
ENSG00000273514	FOXD4L6	4.33834	up	Fork_head
ENSG00000119508	NR4A3	4.54563	up	NGFIB-like
ENSG00000135625	EGR4	4.82611	up	zf-C2H2
ENSG00000161298	ZNF382	5.35823	up	zf-C2H2
ENSG00000172006	ZNF554	5.61569	up	zf-C2H2
ENSG00000171786	NHLH1	6.10569	up	bHLH
ENSG00000119715	ESRRB	6.37086	up	ESR-like
ENSG00000170954	ZNF415	7.02159	up	zf-C2H2
ENSG00000137270	GCM1	7.30963	up	GCM
ENSG00000198715	GLMP	7.52897	up	NCU-G1
ENSG00000198028	ZNF560	9.46799	up	zf-C2H2
ENSG00000166268	MYRFL	9.6533	up	NDT80/PhoG
ENSG00000136931	NR5A1	9.70215	up	SF-like
ENSG00000124664	SPDEF	9.8395	up	ETS
ENSG00000172000	ZNF556	10.1168	up	zf-C2H2
ENSG00000205143	ARID3C	10.1698	up	ARID
ENSG00000171649	ZIK1	10.3182	up	zf-C2H2
ENSG00000179388	EGR3	10.495	up	zf-C2H2
ENSG00000136535	TBR1	10.7486	up	T-box
ENSG00000198633	ZNF534	10.9028	up	zf-C2H2
ENSG00000122877	EGR2	11.1779	up	zf-C2H2
ENSG00000064195	DLX3	12.4122	up	Homeobox
