# Supplementary material for: LINC00629, a KLF10-responsive lncRNA, promotes the anticancer effects of apigenin by decreasing Mcl1 stability in oral squamous cell carcinoma
Source: Aging (Albany NY). 2022 Nov 28;14(22):9149–66. doi: 10.18632/aging.204396 (PMC9740369; doi:10.18632/aging.204396)
Supplement: Supplementary Table 4 [file aging-14-204396-s005.xlsx]

## Sheet: Sheet1
Supplementary Table 4. The 144 candidate transcription factors predicted with JASPAR software.
Matrix ID	Name	Score	Relative score	Sequence ID	Start	End	Strand	Predicted sequence
MA0740.1	KLF14	17.9967	0.958718	seq1	1913	1926	-	ggccacgccccccg
MA0528.1	ZNF263	17.8988	0.9089	seq1	1979	1999	+	gggggcggaaggggggagggg
MA0741.1	KLF16	17.6824	1	seq1	1915	1925	-	gccacgccccc
MA1512.1	KLF11	17.404	0.997828	seq1	1915	1925	-	gccacgccccc
MA1516.1	KLF3	16.6544	0.984634	seq1	1916	1926	-	ggccacgcccc
MA1511.1	KLF10	16.5978	0.985251	seq1	1915	1925	-	gccacgccccc
MA0470.2	E2F4	16.5428	0.94056	seq1	1459	1472	-	tttcggcgccattt
MA1125.1	ZNF384	16.4414	0.993429	seq1	202	213	+	taaaaaaaaaaa
MA1513.1	KLF15	16.2227	0.976161	seq1	1941	1951	+	tccccgccccc
MA0162.2	EGR1	15.7883	0.94926	seq1	1804	1817	-	gctccgcctccgcc
MA0039.4	KLF4	15.6448	0.990313	seq1	798	809	+	agccccaccccc
MA1125.1	ZNF384	15.576	0.980184	seq1	201	212	+	gtaaaaaaaaaa
MA1125.1	ZNF384	15.4851	0.978793	seq1	359	370	+	agaaaaaaaaaa
MA0864.2	E2F2	15.4798	0.925049	seq1	1458	1473	-	atttcggcgccatttt
MA0599.1	KLF5	15.4291	0.999533	seq1	799	808	+	gccccacccc
MA1107.1	KLF9	15.3278	0.937253	seq1	1914	1926	-	ggccacgcccccc
MA1125.1	ZNF384	15.2898	0.975803	seq1	358	369	+	aagaaaaaaaaa
MA1125.1	ZNF384	15.1685	0.973947	seq1	200	211	+	ggtaaaaaaaaa
MA1653.1	ZNF148	15.0491	0.934343	seq1	1940	1951	+	ctccccgccccc
MA1513.1	KLF15	15.0214	0.958825	seq1	1184	1194	+	tccccgcccct
MA1517.1	KLF6	14.9698	0.990761	seq1	1916	1926	-	ggccacgcccc
MA1125.1	ZNF384	14.8417	0.968945	seq1	357	368	+	aaagaaaaaaaa
MA1125.1	ZNF384	14.7459	0.96748	seq1	1210	1221	-	ggaaaaaaaaaa
MA0741.1	KLF16	14.709	0.951393	seq1	799	809	+	gccccaccccc
MA1534.1	NR1I3	14.5095	1	seq1	515	523	-	atgaacttt
MA1534.1	NR1I3	14.5095	1	seq1	1098	1106	-	atgaacttt
MA0845.1	FOXB1	14.3153	0.94957	seq1	290	300	-	tttgtaaatat
MA1511.1	KLF10	14.2419	0.953973	seq1	799	809	+	gccccaccccc
MA0481.1	FOXP1	14.2081	0.904056	seq1	355	369	+	aaaaagaaaaaaaaa
MA0024.2	E2F1	14.1639	0.981114	seq1	1700	1710	+	ggggcgcgagg
MA0481.1	FOXP1	14.1335	0.902833	seq1	503	517	+	cttagaaaaacaaaa
MA0162.2	EGR1	14.1324	0.931526	seq1	799	812	+	gccccacccccttc
MA1102.2	CTCFL	14.0746	0.938897	seq1	1762	1773	+	tggagggggcgc
MA0599.1	KLF5	14.013	0.981518	seq1	1916	1925	-	gccacgcccc
MA0599.1	KLF5	13.9271	0.980425	seq1	1184	1193	+	tccccgcccc
MA0599.1	KLF5	13.9271	0.980425	seq1	1941	1950	+	tccccgcccc
MA1515.1	KLF2	13.8939	0.980665	seq1	1916	1926	-	ggccacgcccc
MA0598.1	EHF	13.8013	0.999537	seq1	1591	1598	-	ccttcctc
MA1125.1	ZNF384	13.7274	0.95189	seq1	1211	1222	-	gggaaaaaaaaa
MA1112.2	NR4A1	13.7148	0.959298	seq1	1270	1281	+	ttaaatgtcaga
MA0753.1	ZNF740	13.7106	0.944255	seq1	1317	1326	+	acccccccaa
MA0095.2	YY1	13.7069	0.92375	seq1	1457	1468	+	gaaaatggcgcc
MA0162.2	EGR1	13.6976	0.92687	seq1	1976	1989	-	cttccgcccccggg
MA0741.1	KLF16	13.6926	0.934777	seq1	1941	1951	+	tccccgccccc
MA1125.1	ZNF384	13.6201	0.950248	seq1	203	214	+	aaaaaaaaaaag
MA1125.1	ZNF384	13.5218	0.948744	seq1	361	372	+	aaaaaaaaaaca
MA1125.1	ZNF384	13.5218	0.948744	seq1	1208	1219	-	aaaaaaaaaaca
MA1522.1	MAZ	13.4953	0.951191	seq1	1761	1771	-	gccccctccac
MA0528.2	ZNF263	13.48	0.932939	seq1	1586	1597	+	acagggaggaag
MA0007.2	AR	13.3485	0.921898	seq1	933	947	-	aggtacatcgtgtgt
MA1125.1	ZNF384	13.3267	0.945758	seq1	360	371	+	gaaaaaaaaaac
MA1125.1	ZNF384	13.3267	0.945758	seq1	1209	1220	-	gaaaaaaaaaac
MA0599.1	KLF5	13.314	0.972626	seq1	1991	2000	-	tcccctcccc
MA1110.1	NR1H4	13.2141	0.949293	seq1	746	756	-	tgaatgaccct
MA1125.1	ZNF384	13.1849	0.943587	seq1	199	210	+	tggtaaaaaaaa
MA0471.2	E2F6	13.1766	0.925134	seq1	1939	1951	-	gggggcggggagc
MA1125.1	ZNF384	13.1328	0.942791	seq1	1212	1223	-	tgggaaaaaaaa
MA1512.1	KLF11	13.1009	0.935169	seq1	1941	1951	+	tccccgccccc
MA0032.2	FOXC1	13.0852	0.949914	seq1	290	300	-	tttgtaaatat
MA0042.1	FOXI1	13.0041	0.94972	seq1	1000	1011	-	ggttgtttagtt
MA1638.1	HAND2	12.9535	0.992096	seq1	1355	1364	+	accagatgtt
MA1522.1	MAZ	12.9469	0.943202	seq1	1188	1198	+	cgcccctccat
MA1512.1	KLF11	12.9173	0.932495	seq1	799	809	+	gccccaccccc
MA0039.4	KLF4	12.7022	0.930568	seq1	1940	1951	+	ctccccgccccc
MA1517.1	KLF6	12.6583	0.949207	seq1	920	930	+	ccccacacccc
MA0647.1	GRHL1	12.6476	0.900081	seq1	367	378	+	aaaacatgttta
MA0800.1	EOMES	12.4631	0.90243	seq1	1046	1058	-	aatgtgtgattaa
MA0912.2	HOXD3	12.4359	0.972561	seq1	214	221	-	ctaatgac
MA0610.1	DMRT3	12.3465	0.932543	seq1	756	766	-	attgtatcagt
MA0100.3	MYB	12.3002	0.9899	seq1	23	32	+	tccaactgta
MA0670.1	NFIA	12.2902	0.981403	seq1	279	288	-	attgccaaaa
MA0698.1	ZBTB18	12.2722	0.909731	seq1	1353	1365	+	tcaccagatgttt
MA0471.2	E2F6	12.2663	0.908347	seq1	1182	1194	-	aggggcggggaga
MA1515.1	KLF2	12.2549	0.948463	seq1	920	930	+	ccccacacccc
MA1468.1	ATOH7	12.1719	0.955004	seq1	1355	1364	-	aacatctggt
MA1513.1	KLF15	12.1602	0.917538	seq1	1291	1301	+	atcccgcccgc
MA0764.2	ETV4	12.1467	0.95744	seq1	1590	1599	+	ggaggaagga
MA0764.2	ETV4	12.1457	0.957422	seq1	861	870	-	agaggaagag
MA0042.1	FOXI1	12.1356	0.928754	seq1	434	445	-	gtatatttgtgt
MA0039.4	KLF4	12.1002	0.918346	seq1	920	931	+	ccccacacccca
MA0599.1	KLF5	12.0872	0.957019	seq1	921	930	+	cccacacccc
MA1499.1	HOXB4	12.0724	0.998332	seq1	214	221	+	gtcattag
MA0039.4	KLF4	12.0514	0.917357	seq1	1183	1194	+	ctccccgcccct
MA0148.4	FOXA1	12.0037	0.910645	seq1	288	299	-	ttgtaaatatca
MA0748.2	YY2	11.9422	0.91974	seq1	1459	1469	+	aaatggcgccg
MA1099.2	HES1	11.9391	0.959945	seq1	1924	1933	-	agcgcgtggc
MA0764.2	ETV4	11.8578	0.95237	seq1	1594	1603	+	gaaggaaggg
MA1515.1	KLF2	11.7789	0.93911	seq1	798	808	+	agccccacccc
MA0122.2	NKX3-2	11.7744	0.954587	seq1	89	97	-	gacacttaa
MA0047.3	FOXA2	11.7222	0.929975	seq1	289	299	-	ttgtaaatatc
MA0741.1	KLF16	11.7222	0.902567	seq1	1990	2000	-	tcccctccccc
MA0650.1	HOXA13	11.6237	0.922718	seq1	99	108	-	ctaataaata
MA0741.1	KLF16	11.6025	0.900609	seq1	1184	1194	+	tccccgcccct
MA0124.1	NKX3-1	11.5805	1	seq1	31	37	-	atactta
MA0124.1	NKX3-1	11.5805	1	seq1	140	146	-	atactta
MA1509.1	IRF6	11.5673	0.920094	seq1	776	784	+	atcgatact
MA0470.1	E2F4	11.5445	0.92763	seq1	1701	1711	+	gggcgcgaggt
MA0063.2	NKX2-5	11.5031	0.942659	seq1	87	97	-	gacacttaaca
MA0039.3	KLF4	11.5005	0.913546	seq1	922	932	+	ccacaccccaa
MA0895.1	HMBOX1	11.4959	0.948876	seq1	104	113	+	attagttaat
MA0754.1	CUX1	11.4852	0.937223	seq1	774	783	+	gaatcgatac
MA1478.1	DMRTA2	11.4777	0.914797	seq1	775	786	+	aatcgatacttt
MA1472.1	BHLHA15(var.2)	11.467	0.953275	seq1	1355	1364	+	accagatgtt
MA0899.1	HOXA10	11.4664	0.933963	seq1	108	118	+	gttaataaaat
MA0755.1	CUX2	11.4402	0.921867	seq1	774	783	+	gaatcgatac
MA1125.1	ZNF384	11.4388	0.916863	seq1	204	215	+	aaaaaaaaaagt
MA1511.1	KLF10	11.4332	0.916682	seq1	921	931	+	cccacacccca
MA1471.1	BARX2	11.4293	0.93486	seq1	210	221	+	aaaagtcattag
MA0470.1	E2F4	11.4263	0.925759	seq1	1182	1192	-	gggcggggaga
MA0900.2	HOXA2	11.4197	0.980781	seq1	214	221	+	gtcattag
MA0909.1	HOXD13	11.3831	0.927117	seq1	99	108	-	ctaataaata
MA0635.1	BARHL2	11.3793	0.978422	seq1	831	840	+	gctaaatgat
MA1513.1	KLF15	11.3566	0.905941	seq1	1915	1925	-	gccacgccccc
MA0610.1	DMRT3	11.3157	0.91099	seq1	38	48	-	agtgtaacaag
MA1507.1	HOXD4	11.305	0.999229	seq1	214	221	+	gtcattag
MA0774.1	MEIS2	11.2885	0.952576	seq1	1113	1120	-	ttgacaga
MA0673.1	NKX2-8	11.2754	0.974426	seq1	1451	1459	+	ccactcgaa
MA0471.1	E2F6	11.2743	0.92736	seq1	1577	1587	+	gcgagggagac
MA0468.1	DUX4	11.2328	0.927973	seq1	1042	1052	+	gaaattaatca
MA1478.1	DMRTA2	11.2204	0.909602	seq1	755	766	+	cactgatacaat
MA1496.1	HOXA4	11.1957	1	seq1	214	221	+	gtcattag
MA0738.1	HIC2	11.1796	0.977517	seq1	1712	1720	-	gtgcccagc
MA0901.1	HOXB13	11.1768	0.915347	seq1	99	108	-	ctaataaata
MA1504.1	HOXC4	11.1502	0.99937	seq1	214	221	+	gtcattag
MA0893.2	GSX2	11.1127	0.993741	seq1	214	221	+	gtcattag
MA0105.3	NFKB1	11.0853	0.910692	seq1	1235	1245	+	gagaatttccc
MA0470.1	E2F4	11.0788	0.920255	seq1	1939	1949	-	gggcggggagc
MA0158.2	HOXA5	11.0644	0.97587	seq1	214	221	+	gtcattag
MA1472.1	BHLHA15(var.2)	11.0527	0.944818	seq1	1355	1364	-	aacatctggt
MA0648.1	GSC	11.0519	0.946198	seq1	319	328	-	attaatccca
MA1125.1	ZNF384	11.0289	0.910588	seq1	1422	1433	+	ttttaaaaaatc
MA1467.1	ATOH1(var.2)	10.9646	0.907982	seq1	1355	1364	+	accagatgtt
MA0891.1	GSC2	10.9509	0.958233	seq1	319	328	-	attaatccca
MA1522.1	MAZ	10.9392	0.913956	seq1	1606	1616	-	tccgcctcccc
MA1512.1	KLF11	10.9149	0.903338	seq1	921	931	+	cccacacccca
MA0765.2	ETV5	10.8923	0.912799	seq1	1982	1992	-	ccccttccgcc
MA0909.1	HOXD13	10.8208	0.916744	seq1	109	118	+	ttaataaaat
MA0462.1	BATF::JUN	10.8093	0.924513	seq1	1169	1179	-	aaactgagtaa
MA0846.1	FOXC2	10.7796	0.901626	seq1	505	516	+	tagaaaaacaaa
MA1471.1	BARX2	10.7768	0.924602	seq1	833	844	-	ttaaatcattta
MA1476.1	DLX5	10.7569	0.974329	seq1	387	394	+	acaattat
MA0672.1	NKX2-3	10.7398	0.940508	seq1	88	97	-	gacacttaac
MA0710.1	NOTO	10.7233	0.95736	seq1	50	59	+	acaaattaag
MA1535.1	NR2C1	10.7081	0.977625	seq1	745	753	+	gagggtcat
MA0650.1	HOXA13	10.7077	0.903427	seq1	350	359	+	cccttaaaaa
MA0475.1	FLI1	10.7023	0.902541	seq1	1226	1236	-	tcaggaaacgg
MA0902.2	HOXB2	10.6925	0.980168	seq1	214	221	+	gtcattag
MA1515.1	KLF2	10.6914	0.917744	seq1	1183	1193	+	ctccccgcccc
MA1515.1	KLF2	10.6914	0.917744	seq1	1940	1950	+	ctccccgcccc
MA0775.1	MEIS3	10.6689	0.965308	seq1	1113	1120	-	ttgacaga
MA0618.1	LBX1	10.6671	0.950775	seq1	130	137	+	ttaataag
MA0032.2	FOXC1	10.6053	0.912687	seq1	363	373	+	aaaaaaaacat
MA0612.1	EMX1	10.59	0.960672	seq1	213	222	-	actaatgact
MA0042.2	FOXI1	10.5742	0.94941	seq1	291	297	-	gtaaata
MA0475.1	FLI1	10.5599	0.90042	seq1	860	870	-	agaggaagagg
MA1683.1	FOXA3	10.5456	0.908302	seq1	289	299	-	ttgtaaatatc
MA0481.3	FOXP1	10.5405	0.91107	seq1	289	299	-	ttgtaaatatc
MA1642.1	NEUROG2(var.2)	10.5394	0.903814	seq1	1353	1365	+	tcaccagatgttt
MA0076.2	ELK4	10.5375	0.904627	seq1	1982	1992	-	ccccttccgcc
MA1517.1	KLF6	10.5007	0.910418	seq1	798	808	+	agccccacccc
MA0767.1	GCM2	10.4674	0.905104	seq1	1284	1293	-	gatgggggca
MA0033.2	FOXL1	10.4667	0.967048	seq1	291	297	-	gtaaata
MA0700.2	LHX2	10.4522	0.916253	seq1	385	395	+	gtacaattatc
MA0498.2	MEIS1	10.3534	1	seq1	1114	1120	-	ttgacag
MA0895.1	HMBOX1	10.3444	0.924762	seq1	667	676	+	cctagtttac
MA1468.1	ATOH7	10.3209	0.920963	seq1	1355	1364	+	accagatgtt
MA0506.1	NRF1	10.3156	0.904382	seq1	1864	1874	-	ccggctgcgcc
MA0904.2	HOXB5	10.2961	0.967073	seq1	214	221	+	gtcattag
MA0156.1	FEV	10.2758	0.938074	seq1	486	493	-	aaggaaat
MA0848.1	FOXO4	10.2484	0.951265	seq1	291	297	-	gtaaata
MA0904.2	HOXB5	10.2424	0.966	seq1	214	221	-	ctaatgac
MA0913.2	HOXD9	10.2409	0.916245	seq1	109	118	+	ttaataaaat
MA0847.1	FOXD2	10.2358	0.970097	seq1	291	297	-	gtaaata
MA0903.1	HOXB3	10.2263	0.971962	seq1	213	222	+	agtcattagt
MA0801.1	MGA	10.2242	0.928154	seq1	1050	1057	-	atgtgtga
MA0899.1	HOXA10	10.2217	0.908087	seq1	200	210	+	ggtaaaaaaaa
MA0914.1	ISL2	10.1975	0.952798	seq1	89	96	-	acacttaa
MA0645.1	ETV6	10.1701	0.902152	seq1	1982	1991	+	ggcggaaggg
MA0693.2	VDR	10.1321	0.952398	seq1	515	522	+	aaagttca
MA0693.2	VDR	10.1321	0.952398	seq1	1098	1105	+	aaagttca
MA0033.2	FOXL1	10.1199	0.960697	seq1	99	105	-	ataaata
MA1502.1	HOXB8	10.0945	0.963588	seq1	214	221	+	gtcattag
MA0909.1	HOXD13	10.094	0.903336	seq1	350	359	+	cccttaaaaa
MA0671.1	NFIX	10.0865	0.982969	seq1	280	288	-	attgccaaa
MA1498.1	HOXA7	10.0856	0.968413	seq1	214	221	+	gtcattag
MA1500.1	HOXB6	10.0766	0.975534	seq1	214	221	-	ctaatgac
MA0882.1	DLX6	10.0611	0.974047	seq1	387	394	+	acaattat
MA1517.1	KLF6	10.0572	0.902445	seq1	723	733	-	caagacgcccc
MA1106.1	HIF1A	10.0553	0.928883	seq1	1563	1572	+	gaacgtgcaa
MA1578.1	VEZF1	10.0419	0.913937	seq1	1317	1326	+	acccccccaa
MA0707.1	MNX1	10.0305	0.93902	seq1	108	117	+	gttaataaaa
MA0899.1	HOXA10	10.0256	0.904009	seq1	99	109	-	actaataaata
MA0775.1	MEIS3	10.0251	0.951051	seq1	537	544	-	ttgacacc
MA0878.1	CDX1	10.0107	0.931481	seq1	109	117	+	ttaataaaa
MA0668.1	NEUROD2	10.0083	0.928316	seq1	904	913	-	ggcatatgca
MA1530.1	NKX6-3	10.0074	0.941278	seq1	129	137	-	cttattaaa
MA1578.1	VEZF1	9.9538	0.912123	seq1	1318	1327	+	cccccccaaa
MA0498.2	MEIS1	9.94789	0.991412	seq1	1148	1154	+	ctgacag
MA0878.1	CDX1	9.91462	0.929525	seq1	100	108	-	ctaataaat
MA1536.1	NR2C2(var.2)	9.90234	0.994045	seq1	746	753	+	agggtcat
MA0673.1	NKX2-8	9.85135	0.948676	seq1	88	96	-	acacttaac
MA0157.2	FOXO3	9.83891	0.905451	seq1	201	208	+	gtaaaaaa
MA0910.2	HOXD8	9.83216	0.952788	seq1	214	221	+	gtcattag
MA1578.1	VEZF1	9.83166	0.909608	seq1	1985	1994	-	ccccccttcc
MA1515.1	KLF2	9.83023	0.900823	seq1	800	810	+	ccccaccccct
MA0124.1	NKX3-1	9.80297	0.936115	seq1	699	705	+	ttactta
MA0032.2	FOXC1	9.794	0.900509	seq1	1207	1217	-	aaaaaaaacaa
MA0702.1	LMX1A	9.75724	0.927981	seq1	109	116	+	ttaataaa
MA0708.1	MSX2	9.75103	0.934045	seq1	387	394	+	acaattat
MA0875.1	BARX1	9.73487	0.968839	seq1	387	394	+	acaattat
MA0672.1	NKX2-3	9.73167	0.923204	seq1	1450	1459	+	tccactcgaa
MA1463.1	ARGFX	9.72645	0.900737	seq1	475	484	+	cctaatttaa
MA0774.1	MEIS2	9.72226	0.91705	seq1	537	544	-	ttgacacc
MA0668.1	NEUROD2	9.71628	0.923545	seq1	1355	1364	-	aacatctggt
MA0161.1	NFIC	9.69742	1	seq1	281	286	+	ttggca
MA0156.1	FEV	9.66612	0.916754	seq1	1239	1246	-	cgggaaat
MA0259.1	ARNT::HIF1A	9.65682	0.953992	seq1	1563	1570	+	gaacgtgc
MA0894.1	HESX1	9.64488	0.926919	seq1	386	395	-	gataattgta
MA0157.1	FOXO3	9.63936	0.91593	seq1	373	380	-	gctaaaca
MA1106.1	HIF1A	9.61721	0.918566	seq1	1303	1312	+	aaacgtgctt
MA0612.2	EMX1	9.58054	0.943565	seq1	214	221	+	gtcattag
MA1100.2	ASCL1	9.57094	0.914277	seq1	1775	1784	+	ggctgctgcc
MA0775.1	MEIS3	9.53184	0.940128	seq1	1435	1442	-	gtgacatg
MA0888.1	EVX2	9.51376	0.939803	seq1	213	222	+	agtcattagt
MA0902.1	HOXB2	9.49145	0.957535	seq1	213	222	+	agtcattagt
MA0152.1	NFATC2	9.49015	0.931047	seq1	1094	1100	-	ttttcct
MA0158.2	HOXA5	9.49012	0.946602	seq1	214	221	-	ctaatgac
MA1501.1	HOXB7	9.48492	0.906135	seq1	213	222	+	agtcattagt
MA0703.1	LMX1B	9.46497	0.952356	seq1	109	116	+	ttaataaa
MA1495.1	HOXA1	9.45305	0.962819	seq1	214	221	-	ctaatgac
MA0895.1	HMBOX1	9.44278	0.905879	seq1	1070	1079	-	gttagttatg
MA1525.1	NFATC4	9.43708	0.908413	seq1	427	436	-	tgtggaacaa
MA0057.1	MZF1(var.2)	9.4262	0.919257	seq1	1986	1995	+	gaagggggga
MA1468.1	ATOH7	9.42042	0.904403	seq1	904	913	+	tgcatatgcc
MA0157.1	FOXO3	9.37963	0.907206	seq1	291	298	-	tgtaaata
MA0157.1	FOXO3	9.37963	0.907206	seq1	670	677	-	tgtaaact
MA0498.2	MEIS1	9.36863	0.979145	seq1	979	985	-	ttgacat
MA1535.1	NR2C1	9.36716	0.951802	seq1	1749	1757	+	cggggtcgc
MA0886.1	EMX2	9.36619	0.928655	seq1	213	222	+	agtcattagt
MA0122.2	NKX3-2	9.34659	0.903759	seq1	1264	1272	+	aacacttta
MA0498.2	MEIS1	9.34544	0.978654	seq1	538	544	-	ttgacac
MA0024.2	E2F1	9.31643	0.908185	seq1	1290	1300	-	cgggcgggatg
MA0498.2	MEIS1	9.29801	0.97765	seq1	193	199	-	atgacat
MA0710.1	NOTO	9.2825	0.931881	seq1	475	484	-	ttaaattagg
MA0707.1	MNX1	9.2688	0.921564	seq1	100	109	-	actaataaat
MA0877.2	BARHL1	9.2677	0.96099	seq1	832	839	+	ctaaatga
MA0895.1	HMBOX1	9.2606	0.902064	seq1	217	226	+	attagtaaca
MA0674.1	NKX6-1	9.25538	0.937978	seq1	130	137	-	cttattaa
MA1495.1	HOXA1	9.2538	0.959012	seq1	214	221	+	gtcattag
MA0122.2	NKX3-2	9.2401	0.90153	seq1	499	507	+	actacttag
MA0775.1	MEIS3	9.22628	0.933362	seq1	730	737	-	gtgacaag
MA0666.1	MSX1	9.22115	0.937845	seq1	387	394	+	acaattat
MA0706.1	MEOX2	9.21926	0.921788	seq1	213	222	+	agtcattagt
MA0847.1	FOXD2	9.19033	0.947923	seq1	99	105	-	ataaata
MA0152.1	NFATC2	9.18689	0.919862	seq1	995	1001	-	ttttccc
MA0152.1	NFATC2	9.18689	0.919862	seq1	1216	1222	+	ttttccc
MA0654.1	ISX	9.17917	0.937535	seq1	387	394	+	acaattat
MA0644.1	ESX1	9.15214	0.926854	seq1	386	395	+	tacaattatc
MA0675.1	NKX6-2	9.14932	0.952499	seq1	324	331	-	tccattaa
MA0914.1	ISL2	9.14516	0.925419	seq1	241	248	-	gcaattta
MA0849.1	FOXO6	9.14239	0.929555	seq1	291	297	-	gtaaata
